# Supplementary material for: Visible-light-absorbing C–N cross-coupling for the synthesis of hydrazones involving C(sp2)–H/C(sp3)–H functionalization
Source: Royal Society of Chemistry journal article supplement (doi:10.1039/d2cc07001d), 2023-01-01
Supplement: d2cc07001d1.pdf [file d2cc07001d1.pdf]

## **Visible-light-Absorbing, Photocatalysed C-N cross-coupling for synthesis of Hydrazones involving C(sp<sup>2</sup>)-H/C(sp<sup>3</sup>)-H functionalization**

Ambuj Kumar Kushwaha, Suresh Kumar Maury, Arsala Kamal, Himanshu Kumar Singh, Shikha Pandey and Sundaram Singh\*

Department of Chemistry, Indian Institute of Technology (BHU), Varanasi-221005

\* Address for Correspondence

Dr. Sundaram Singh, Department of Chemistry, Indian Institute of Technology (BHU),  
Varanasi– 221 005, U.P., India,

ORCID: <https://orcid.org/0000-0001-7931-9652>

E-mail: [sundaram.apc@iitbhu.ac.in](mailto:sundaram.apc@iitbhu.ac.in), Tel: +919451658650.

## Table of Content

|                                                                |     |
|----------------------------------------------------------------|-----|
| 1. General considerations                                      | S3  |
| 2. Experimental Procedures                                     | S3  |
| 2.1 General procedure for the preparation of compound 4a-4o    | S3  |
| 2.2 General procedure for the preparation of compound 6a-6o    | S3  |
| 3. Mechanistic Study                                           | S4  |
| 3.1. Radical trapping experiments by TEMPO/ HRMS data          | S4  |
| 3.2 UV-Vis absorption experiment                               | S6  |
| 3.3 Stern- Volmer Fluorescence plots and quenching experiments | S6  |
| 3.4 Quantum yield                                              | S7  |
| 3.5 Light-Dark cycle experiment                                | S8  |
| 4. Characterization data of desired compounds                  | S9  |
| 4.1 HRMS spectra of products                                   | S9  |
| 4.2 <sup>1</sup> H and <sup>13</sup> C NMR data                | S10 |
| 4.3 <sup>1</sup> H and <sup>13</sup> C NMR spectra             | S25 |
| 5. Optimization Table                                          | S80 |
| 6. Control Experiments                                         | S82 |

## 1. General considerations

All the starting materials like Indole, Phenyl hydrazine, Toluene etc. were purchased from Sigma-Aldrich and were directly used without any further purification. All reactions were conducted under open air and oven-dried glassware were used. All reactions were conducted using a blue light-emitting diode (LED) as the visible light source. The progress of reaction was monitored by thin-layer chromatography (TLC) and visualized using UV light. Melting points were determined on a digital melting point apparatus and temperatures were uncorrected. UV-visible spectroscopy of reaction solution was recorded on a SHIMADZU UV-3600 UV-visible spectrophotometer. All the  $^1\text{H}$ ,  $^{13}\text{C}$ , and  $^{19}\text{F}$  NMR spectra were recorded through Bruker 500 MHz spectrometer ( $^1\text{H}$  NMR at 500 MHz,  $^{13}\text{C}$  NMR at 126 MHz and  $^{19}\text{F}$  NMR at 126 MHz), in  $\text{DMSO-d}_6$  and  $\text{CDCl}_3$  chemical shift was indicated in  $\delta$  ppm, using TMS as an internal standard. HRMS ( $m/z$ ) were recorded in an electron ionization or electrospray ionization (ESI) mode on Waters-Q-TOF Premier-HAB213 and Sciex X500R QTOF instruments.

## 2. Experimental Procedures

### 2.1 General procedure for the preparation of compounds 4a-4o and 5a-5o.

A 25 mL RB flask equipped with a magnetic stirring bar was charged with Indole derivatives **1** (0.25 mmol), Eosin Y (3 mol%) and solvent (5 mL). The mixture was then stirred at room temperature and irradiated with blue LEDs lights strips for 6 h under open air. After that Phenyl hydrazine derivatives **2** (0.25 mmol) were added to the reaction mixture. The progress of the reaction was monitored via TLC. The precipitate obtained was filtered and washed with ethanol after the completion of the reaction. The desired product was obtained in good yields after recrystallization using ethanol.

### 2.2 General procedure for the preparation of compounds 6a-6t.

A 25 mL RB flask equipped with a magnetic stirring bar was charged with methylarenes **3** (0.25 mmol), Eosin Y (3 mol%) and solvent (5 mL). The mixture was then stirred at room temperature and irradiated with blue LEDs lights strips for 6 h under open air. After that Phenyl hydrazine derivatives **2** (0.25 mmol) were added to the reaction mixture. The progress of the reaction was monitored via TLC. The precipitate obtained was filtered and washed with ethanol after the completion of the reaction. The desired product was obtained in good yields after recrystallization using ethanol.

### 3. Mechanistic Studies

#### 3.1 Radical trapping experiments by TEMPO/ HRMS data

Several mechanistic investigations were performed to investigate the mechanism of the visible-light photoredox C(sp<sup>2</sup>)-H/C(sp<sup>3</sup>)-H functionalization. At first 2, 2, 6, 6-tetramethylpiperidinoxy (TEMPO) (radical scavengers) (3 equiv.) was added to the reaction system, and the trace amount of the 4a and 6a was formed and TEMPO adducts 7a, 8a and 9a were detected in HRMS data from the crude reaction mixture (**Fig.1, 2 and 3**). These results suggested that the reaction passes through radical pathway.

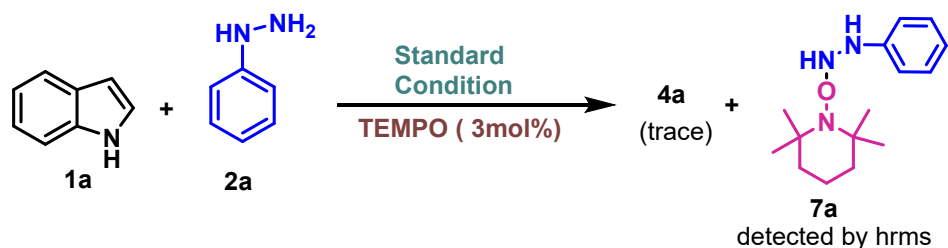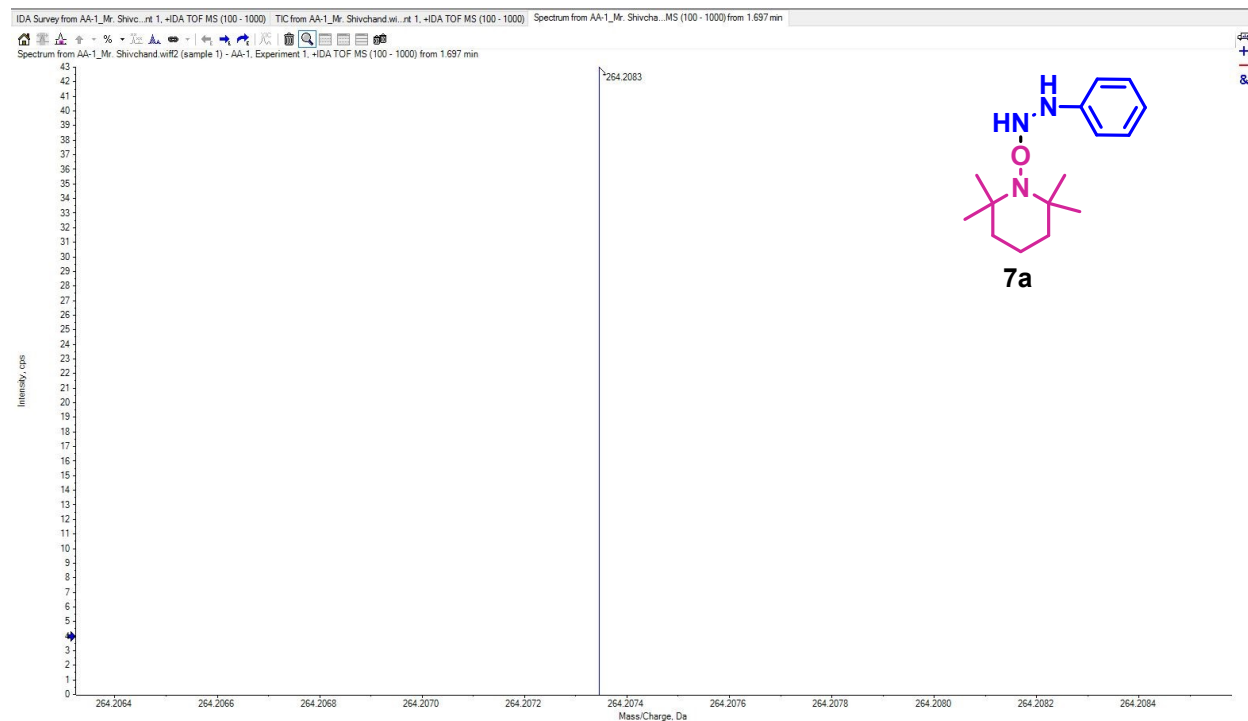

**Fig 1: HRMS of adduct 7a**

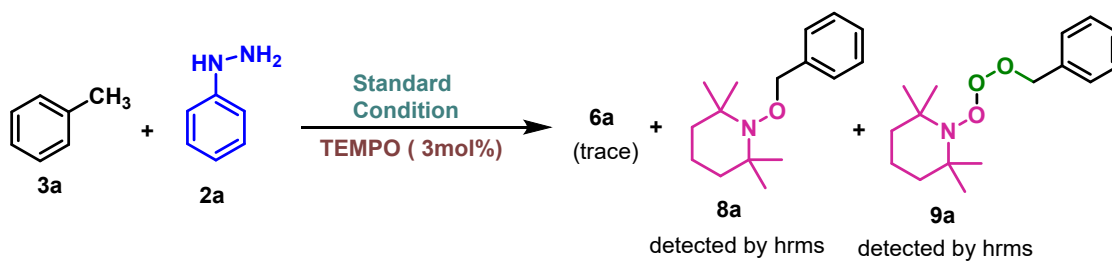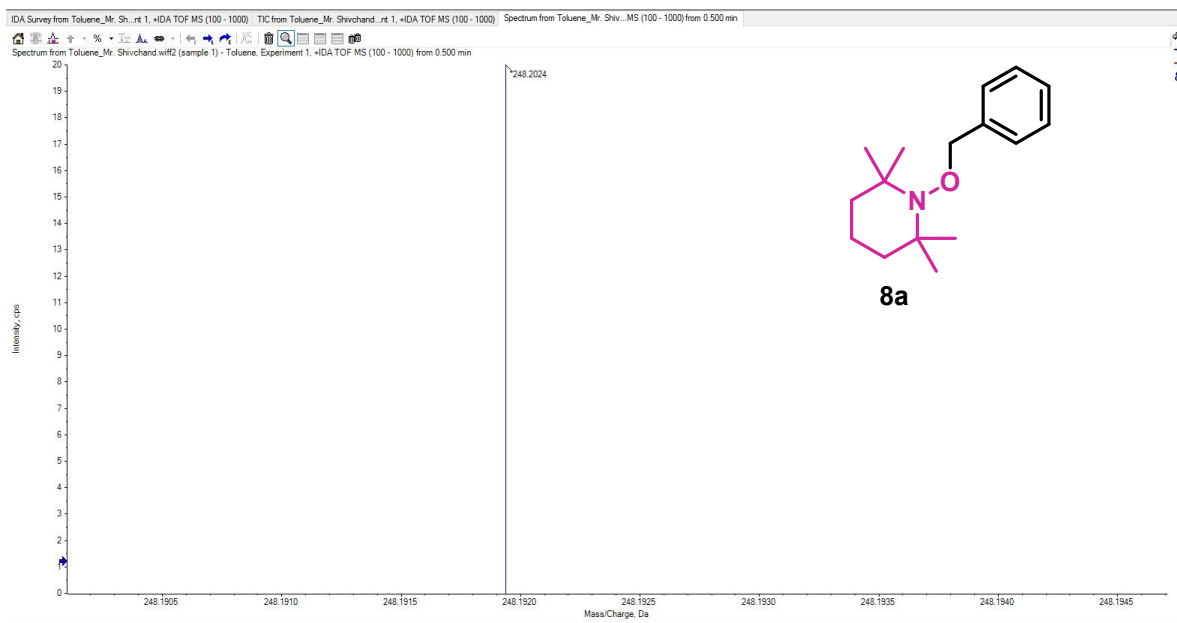

**Fig 2: HRMS of adduct 8a**

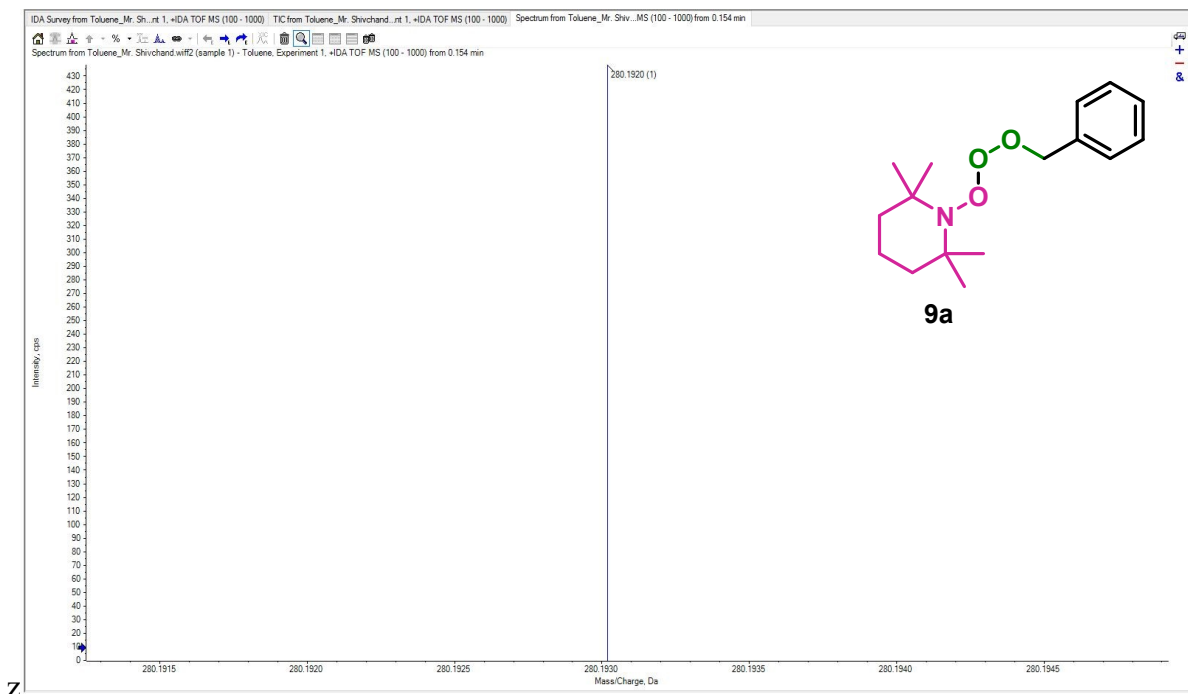

**Fig 3: HRMS of adduct 9a**

### 3.2 UV/Vis absorption spectrometry

SHIMADZU UV-1800 UV-visible spectrophotometer was used to record UV- visible spectroscopy of reactants and reaction mixture. The sample was prepared by mixing of 1a, 2a and mixture (1a+2a) (**Fig 1A**) and 3a, 2a and mixture (2a+3a) (**Fig 1B**) in methanol solvent [Conc. reaction mixture =  $1.25 \times 10^{-4}$  mol/L] in a light path quartz UV cuvette.

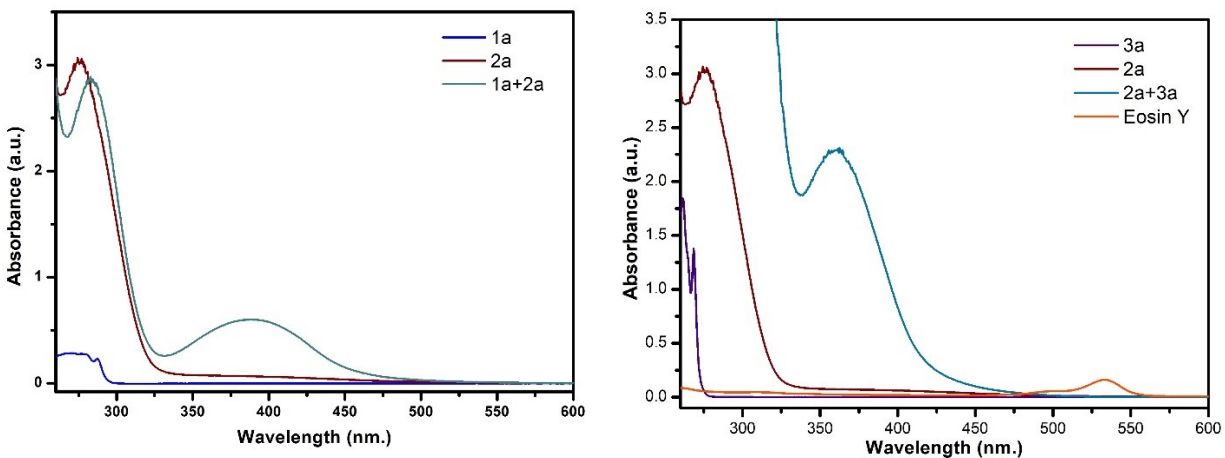

**Fig 4- (A)** UV-vis absorption spectra of (1a+2a), **(B)** UV-vis absorption spectra (2a+3a)

### 3.3 Stern- Volmer Fluorescence plots and quenching experiments

In a Fluorescence experiment, the solution of **2a** in ethanol was added to the appropriate amount of **1a**. The addition of **1a** was repeated 7 consecutive times. We recorded the emission spectra after each addition. All the solutions were excited at **275nm** and the emission was acquired from 0 nm to 450 nm. The result shown in **Fig 5** indicates that **2a** quenches the excited state of **1a** and its emission.

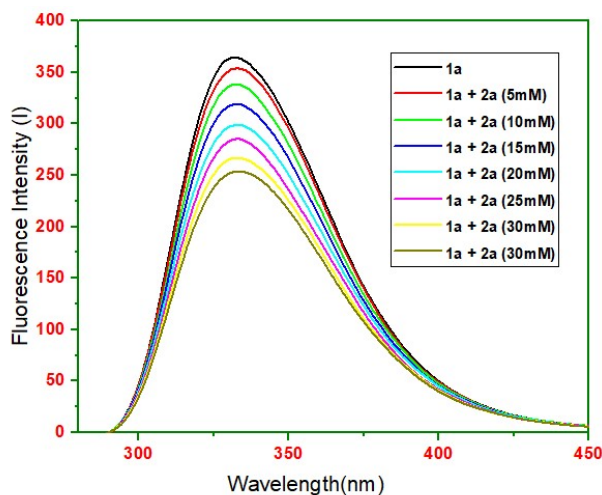

**Fig 5:** The fluorescence emission spectra of 1a with different concentration of quencher 2

The stern-volmer plot (Fig 6) indicated a linear relationship between the concentration of 1 and the ratio  $I_0/I$ . The stern-volmer constant  $K_{SV}$  was calculated using equation 1.

$$I_0/I = 1 + K_{SV}[Q] \quad \dots\dots\dots\text{Eq. 1}$$

Where,  $I_0$  = the intensity of fluorescence of 2a, without quencher 1

$I$  = the intensity of fluorescence of 2a, with quencher 1

$[Q]$  = concentration of the quencher 1

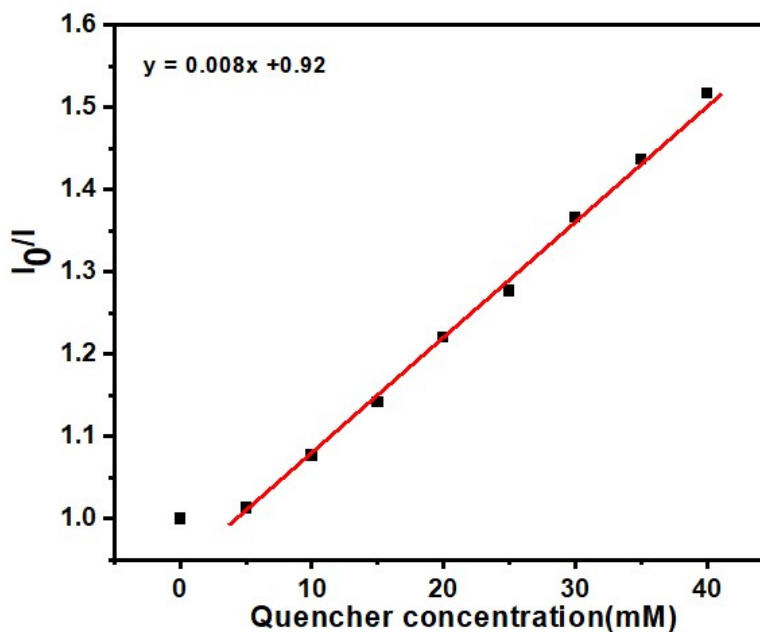

Fig 6: Stern-Volmer fluorescence quenching plot

### 3.4 Quantum Yield

The Quantum yield was recorded on a PerkinElmer LS 55 Fluorescence spectrometer 1.0 mM stock solution of 4a was prepared and diluted with ethanol. The solution was placed in a screw top 1.cm quartz cuvette and emission spectra of the sample was collected. The excitation wavelength was fixed at 395nm (Fig 7).

**Estimation of Quantum Yields:** The quantum yield of probe *DPA* and *DPA*+ $N_2H_4$  with respect to Quinine sulfate ( $\Phi = 0.54$ , 1M  $H_2SO_4$ ) as an internal standard was estimated by using equation

$$Q = Q_R \cdot I/I_R \cdot OD_R/OD \cdot n^2/n^2_R$$

Where  $Q$  is the quantum yield,  $I$  stand for integrated area of fluorescence intensities,  $OD$  is optical densities and  $n$  is the refractive indexes of solution. The subscript  $R$  refers to the reference fluorophore of known quantum yield.

**Quantum Yields  $\Phi = 0.0074$**

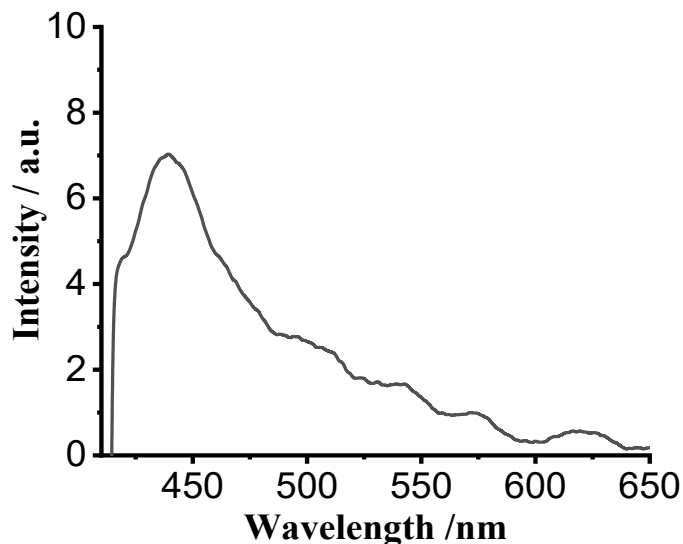

**Fig 7: Quantum yield**

### 3.5 Light-Dark cycle experiment

The reaction between **1b** and **2a** was conducted under the standard conditions on a 0.25 mmol scale. The reaction mixture was subjected to sequential periods of stirring under visible light irradiation (blue LED) followed by stirring in the absence of light. At each time point, one reaction system was suspended, which was then purified with column chromatography to give the corresponding products **3a**. The yield of **3a** was measured by weight of the product (**Fig 8**).

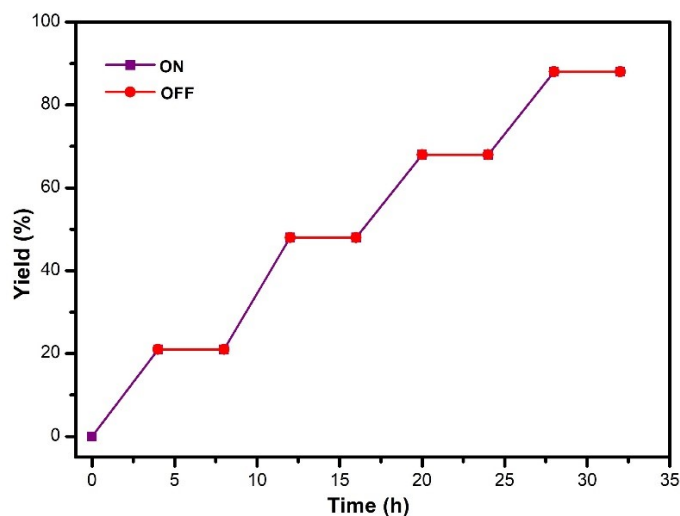

**Fig 8: Light-Dark cycle experiment**



## 4. Characterization data of desired compounds

### 4.1 HRMS spectra of products

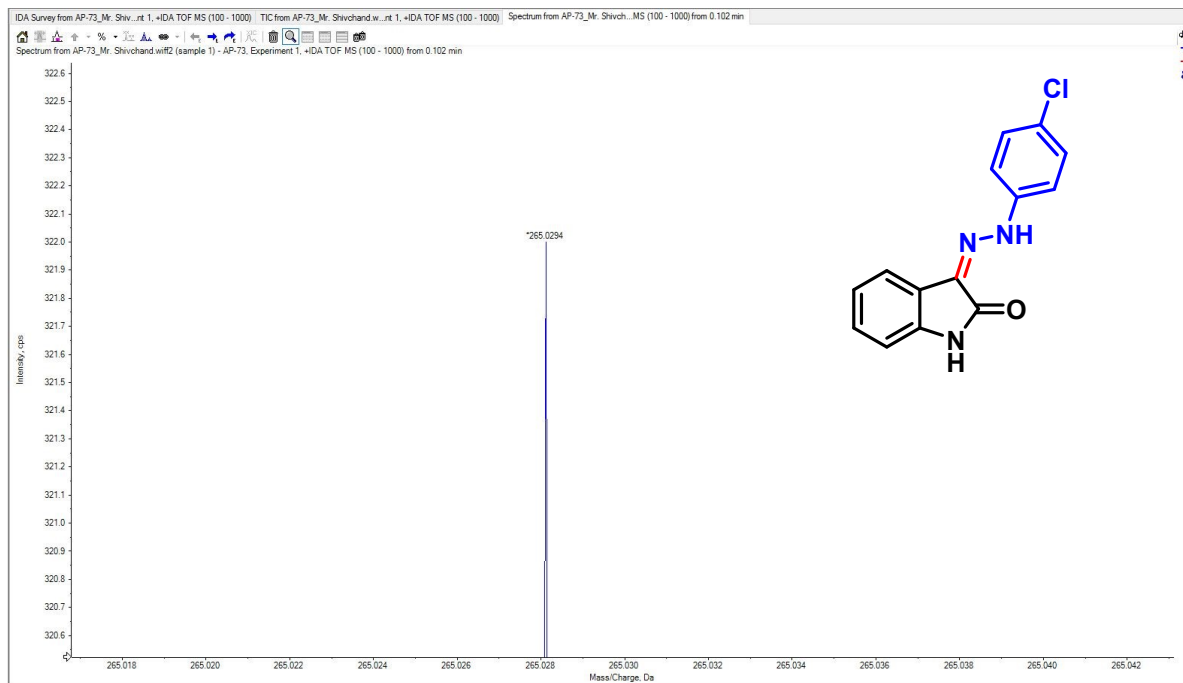

Fig 9: HRMS of compound 5c

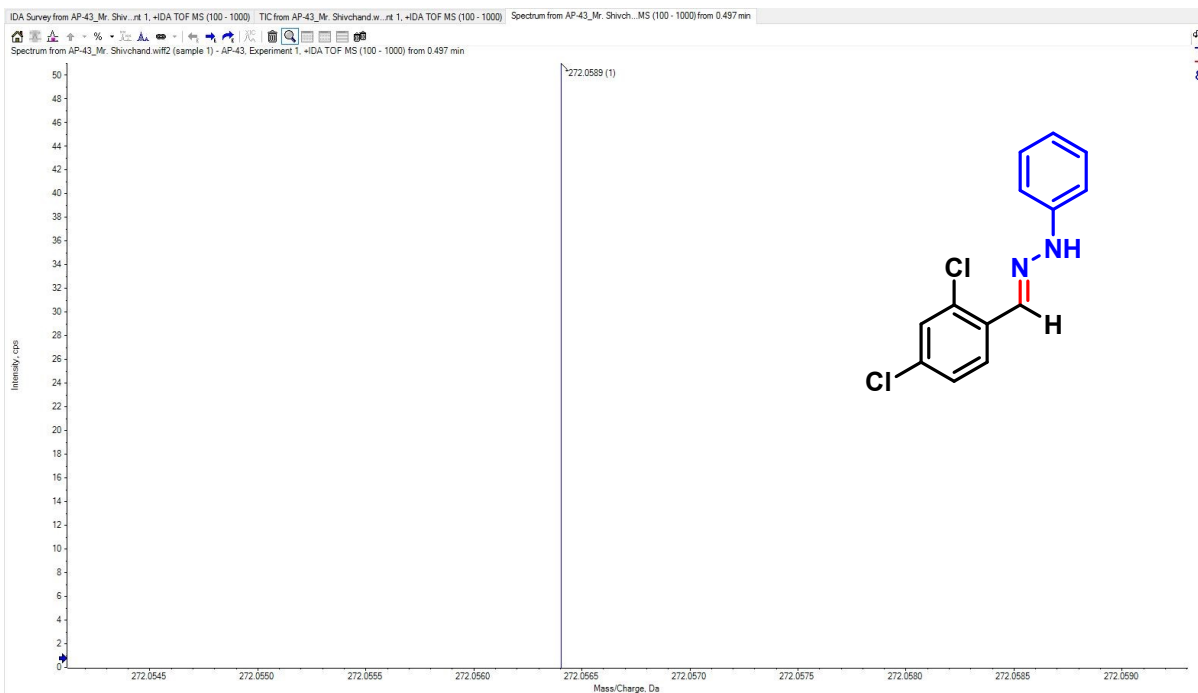

Fig 10: HRMS of compound 6c

## 4.2 <sup>1</sup>H and <sup>13</sup>C NMR data

### 3-(2-phenylhydrazineylidene)indolin-2-one (4a)

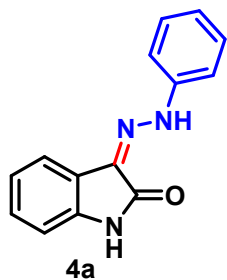

88% yield. Dark yellow solid. m.p.: 218-219 °C. <sup>1</sup>H NMR (500 MHz, DMSO) δ 12.75 (s, 1H), 11.03 (s, 1H), 7.56 (d, *J* = 7.3 Hz, 1H), 7.43 (d, *J* = 7.6 Hz, 2H), 7.39 (d, *J* = 7.3 Hz, 2H), 7.25 (t, *J* = 7.7 Hz, 1H), 7.08 – 7.04 (m, 2H), 6.93 (d, *J* = 7.8 Hz, 1H). <sup>13</sup>C NMR (126 MHz, DMSO) δ 163.65, 142.98, 140.28, 129.97, 128.99, 128.16, 123.39, 122.36, 121.63, 119.10, 114.55, 110.99. HRMS (ESI) *m/z*: [M+H]<sup>+</sup> + calculated for C<sub>14</sub>H<sub>11</sub>N<sub>3</sub>O 238.0902; found: 238.0900.

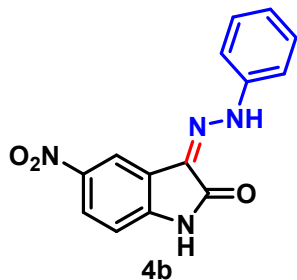

### 5-nitro-3-(2-phenylhydrazineylidene)indolin-2-one (4b)

92% yield. Yellowish brown. m.p.: 280-281°C. <sup>1</sup>H NMR (500 MHz, DMSO) δ 12.75 (s, 1H), 11.67 (s, 1H), 8.33 (d, *J* = 2.3 Hz, 1H), 8.18 (m, *J* = 8.6 Hz, 1H), 7.57 (m, *J* = 8.6 Hz, 2H), 7.41 (m, *J* = 7.8 Hz, 2H), 7.12 (m, *J* = 8.2 Hz, 2H). <sup>13</sup>C NMR (126 MHz, DMSO) δ 163.77, 145.13, 142.90, 142.57, 129.98, 126.06, 124.77, 124.39, 122.45, 115.39, 114.02, 111.05. HRMS (ESI) *m/z*: [M+H]<sup>+</sup> + calculated for C<sub>14</sub>H<sub>10</sub>N<sub>4</sub>O<sub>3</sub> 283.0753; found: 283.0757.

### 5-chloro-3-(2-phenylhydrazineylidene)indolin-2-one (4c)

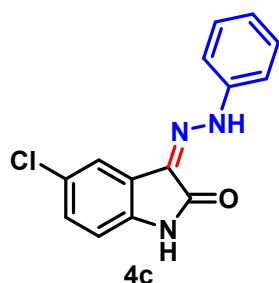

89% yield. Yellow solid. m.p.: 270-271 °C <sup>1</sup>H NMR (500 MHz, DMSO) δ 12.75 (s, 1H), 11.15 (s, 1H), 7.58 (d, *J* = 7.1 Hz, 1H), 7.49 (d, *J* = 7.8 Hz, 2H), 7.39 (m, *J* = 7.8 Hz, 2H), 7.28 (m, *J* = 8.3 Hz, 1H), 7.09 (d, *J* = 7.3 Hz, 1H), 6.94 (d, *J* = 8.3 Hz, 1H). <sup>13</sup>C NMR (126 MHz, DMSO) δ 163.42, 142.76, 138.80, 129.95, 128.23, 126.95, 126.58, 123.88, 123.46, 118.66, 114.96, 112.40. HRMS (ESI) *m/z*: [M+H]<sup>+</sup> + calculated for C<sub>14</sub>H<sub>11</sub>N<sub>3</sub>O 238.0902; found: 238.0900.

### 5-bromo-3-(2-phenylhydrazineylidene)indolin-2-one (4d)

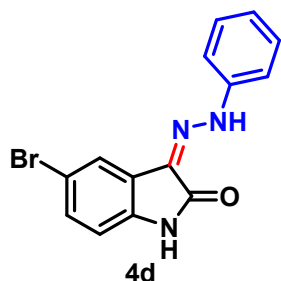

91% yield. Brown solid. m.p.: 265-267 °C.  $^1\text{H NMR}$  (500 MHz, DMSO)  $\delta$  12.75 (s, 1H), 11.15 (s, 1H), 7.58 (d,  $J = 2.0$  Hz, 1H), 7.49 (d,  $J = 7.7$  Hz, 2H), 7.39 (t,  $J = 7.9$  Hz, 2H), 7.27 (m,  $J = 8.3$  Hz, 1H), 7.08 (s, 1H), 6.93 (d,  $J = 8.3$  Hz, 1H).  $^{13}\text{C NMR}$  (126 MHz, DMSO)  $\delta$  163.42, 142.76, 138.81, 129.94, 128.23, 126.96, 126.58, 123.87, 123.46, 118.66, 114.96, 112.39. **HRMS** (ESI)  $m/z$ :  $[\text{M}+\text{H}]^+$  + calculated for  $\text{C}_{14}\text{H}_{10}\text{N}_3\text{BrO}$  316.0007; found: 316.0006.

#### 5-fluoro-3-(2-phenylhydrazineylidene)indolin-2-one (4e)

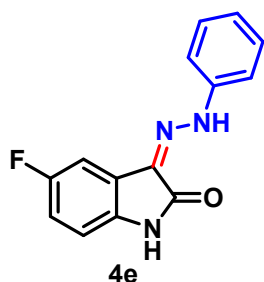

86% yield. Reddish solid. m.p.: 251-253 °C.  $^1\text{H NMR}$  (500 MHz, DMSO)  $\delta$  12.77 (s, 1H), 11.12 (s, 1H), 7.81 (d,  $J = 8.8$  Hz, 2H), 7.64 (d,  $J = 8.9$  Hz, 3H), 7.46 – 7.42 (m, 1H), 7.15 – 7.09 (m, 1H), 6.92 (dd,  $J = 8.5, 4.2$  Hz, 1H).  $^{13}\text{C NMR}$  (126 MHz, DMSO)  $\delta$  163.43, 159.69, 146.69, 137.41, 134.25, 130.59, 122.55, 119.75, 116.41, 116.22, 115.28, 112.10, 107.10, 106.90, 104.69.  $^{19}\text{F NMR}$  (471 MHz, DMSO)  $\delta$  -121.15, -121.16. **HRMS** (ESI)  $m/z$ :  $[\text{M}+\text{H}]^+$  + calculated for  $\text{C}_{14}\text{H}_{10}\text{FN}_3\text{O}$  256.0808; found: 256.0809.

#### 6-chloro-3-(2-phenylhydrazineylidene)indolin-2-one (4f)

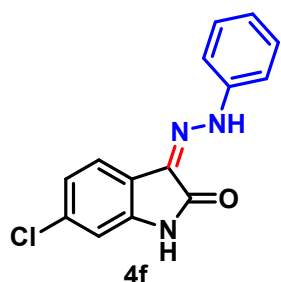

91% yield. Yellowish solid. m.p.: 264-265 °C.  $^1\text{H NMR}$  (500 MHz, DMSO)  $\delta$  12.80 (s, 1H), 11.09 (s, 1H), 7.54 (d,  $J = 7.5$  Hz, 1H), 7.52 – 7.40 (m, 3H), 7.24 (m,  $J = 8.3$  Hz, 1H), 6.99 – 6.97 (m, 2H), 6.92 (d,  $J = 8.3$  Hz, 1H).  $^{13}\text{C NMR}$  (126 MHz, DMSO)  $\delta$  163.44, 156.39, 138.29, 136.38, 127.60, 126.43, 125.57, 123.67, 118.22, 116.37, 115.24, 112.24. **HRMS** (ESI)  $m/z$ :  $[\text{M}+\text{H}]^+$  + calculated for  $\text{C}_{14}\text{H}_{10}\text{ClN}_3\text{O}$  272.0512; found: 272.0514.

#### 6-bromo-3-(2-phenylhydrazineylidene)indolin-2-one (4g)

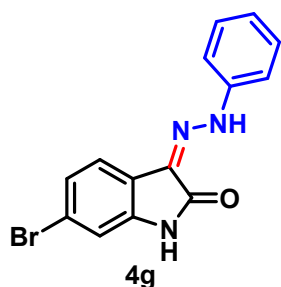

found: 316.0009.

92% yield. Yellowish solid. m.p.: 270-272 °C.  $^1\text{H NMR}$  (500 MHz, DMSO)  $\delta$  12.79 (s, 1H), 11.09 (s, 1H), 7.67 (d,  $J = 7.9$  Hz, 1H), 7.52 – 7.41 (m, 3H), 7.37 (m,  $J = 8.3$  Hz, 1H), 6.99 – 6.96 (m, 2H), 6.88 (d,  $J = 8.3$  Hz, 1H).  $^{13}\text{C NMR}$  (126 MHz, DMSO)  $\delta$  163.27, 156.40, 138.65, 136.39, 130.38, 125.40, 124.11, 120.98, 116.40, 115.13, 114.13, 112.74. **HRMS** (ESI) m/z:  $[\text{M}+\text{H}]^+$  calculated for  $\text{C}_{14}\text{H}_{10}\text{BrN}_3\text{O}$  316.0007;

#### Chloro-3-(2-phenylhydrazineylidene)indolin-2-one (4h)

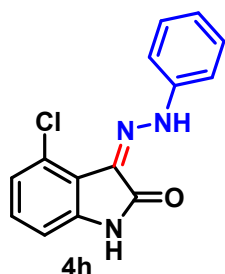

$\text{C}_{14}\text{H}_{10}\text{ClN}_3\text{O}$  272.0512; found: 272.0514.

85% yield. Yellowish solid. m.p.: 263-264 °C.  $^1\text{H NMR}$  (500 MHz, DMSO)  $\delta$  13.11 (s, 1H), 11.17 (s, 1H), 7.82 (m,  $J = 8.2$  Hz, 1H), 7.61 (m,  $J = 7.5$  Hz, 1H), 7.51 (m,  $J = 8.0$  Hz, 1H), 7.45 – 7.40 (m, 1H), 7.31 (m,  $J = 7.7$  Hz, 1H), 7.11 – 7.04 (m, 2H), 6.96 (d,  $J = 7.8$  Hz, 1H).  $^{13}\text{C NMR}$  (126 MHz, DMSO)  $\delta$  163.83, 140.96, 139.25, 130.09, 129.87, 129.06, 123.76, 122.57, 119.71, 118.64, 114.60, 111.26. **HRMS** (ESI) m/z:  $[\text{M}+\text{H}]^+$  calculated for

#### 5,7-dichloro-3-(2-phenylhydrazineylidene)indolin-2-one (4i)

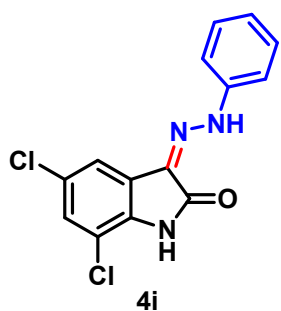

m/z:  $[\text{M}+\text{H}]^+$  calculated for  $\text{C}_{14}\text{H}_9\text{Cl}_2\text{N}_3\text{O}$  306.0123; found: 306.0124.

84% yield. Dark brown solid. m.p.: 258-259 °C.  $^1\text{H NMR}$  (500 MHz, DMSO)  $\delta$  13.09 (s, 1H), 11.20 (s, 1H), 7.80 (d,  $J = 8.9$  Hz, 1H), 7.69 (d,  $J = 8.3$  Hz, 1H), 7.61 (d,  $J = 7.2$  Hz, 1H), 7.49 (m,  $J = 8.8$  Hz, 1H), 7.32 (m,  $J = 7.7$  Hz, 1H), 7.09 (m,  $J = 7.6$  Hz, 1H), 6.96 (d,  $J = 7.8$  Hz, 1H).  $^{13}\text{C NMR}$  (126 MHz, DMSO)  $\delta$  163.84, 141.17, 138.52, 131.61, 130.16, 129.43, 126.50, 122.66, 120.85, 119.90, 115.68, 111.34. **HRMS** (ESI)

#### 5-methyl-3-(2-phenylhydrazineylidene)indolin-2-one (4j)

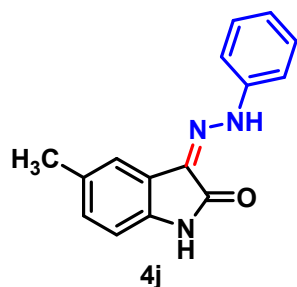

86% yield. Yellow solid. m.p.: 251-252 °C.  $^1\text{H NMR}$  (500 MHz, DMSO)  $\delta$  12.73 (s, 1H), 10.92 (s, 1H), 7.43 (d,  $J = 7.5$  Hz, 2H), 7.40 – 7.36 (m, 3H), 7.05 (m,  $J = 8.3$  Hz, 2H), 6.82 (d,  $J = 7.9$  Hz, 1H), 2.32 (s, 3H).

$^{13}\text{C NMR}$  (126 MHz, DMSO)  $\delta$  163.77, 143.04, 138.11, 131.28, 129.95, 129.49, 128.31, 123.28, 121.67, 119.54, 114.49, 110.74, 21.19.

**HRMS** (ESI)  $m/z$ :  $[\text{M}+\text{H}]^+$  + calculated for  $\text{C}_{15}\text{H}_{13}\text{N}_3\text{O}$  252.1059;

found: 252.1057.

#### 5-methoxy-3-(2-phenylhydrazineylidene)indolin-2-one (4k)

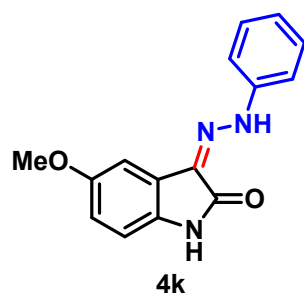

85% yield. Dark brown solid. m.p.: 245-247°C.  $^1\text{H NMR}$  (500 MHz, DMSO)  $\delta$  12.79 (s, 1H), 10.85 (s, 1H), 7.45 (d,  $J = 7.7$  Hz, 2H), 7.38 (t,  $J = 7.9$  Hz, 2H), 7.15 (s, 1H), 7.05 (s, 1H), 6.84 (d,  $J = 7.1$  Hz, 2H), 3.78 (s, 3H).  $^{13}\text{C NMR}$  (126 MHz, DMSO)  $\delta$  163.87, 155.56, 142.95, 134.06, 129.94, 128.49, 123.39, 122.44, 115.27, 114.60, 111.69, 104.34, 56.01.

**HRMS** (ESI)  $m/z$ :  $[\text{M}+\text{H}]^+$  + calculated for  $\text{C}_{15}\text{H}_{13}\text{N}_3\text{O}_2$  268.1008;

found: 268.1009.

#### 5,7-dimethyl-3-(2-phenylhydrazineylidene)indolin-2-one (4l)

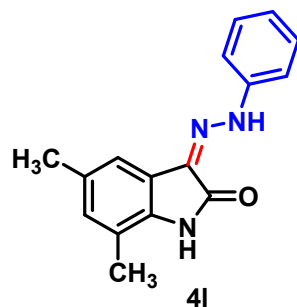

84% yield. White solid. m.p.: 256-258 °C.  $^1\text{H NMR}$  (500 MHz, DMSO)  $\delta$  12.95 (s, 1H), 11.07 (s, 1H), 7.61 – 7.55 (m, 2H), 7.25 (m,  $J = 7.7$  Hz, 1H), 7.12 – 7.04 (m, 3H), 6.95 (d,  $J = 7.8$  Hz, 1H), 2.26 (d,  $J = 5.2$  Hz, 6H).  $^{13}\text{C NMR}$  (126 MHz, DMSO)  $\delta$  164.05, 140.01, 138.51, 132.10, 131.78, 128.75, 128.28, 122.89, 122.34, 118.95, 112.89, 111.05, 20.83, 16.77.

**HRMS** (ESI)  $m/z$ :  $[\text{M}+\text{H}]^+$  + calculated for  $\text{C}_{16}\text{H}_{15}\text{N}_3\text{O}$

266.1215; found: 266.1217.

#### Ethyl-2-oxo-3-(2-phenylhydrazineylidene)indoline-1-carboxylate (4m)

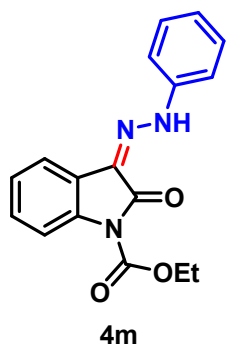

86% yield. Pale yellow solid. m.p.: 284-285 °C.  $^1\text{H NMR}$  (500 MHz, DMSO)  $\delta$  12.58 (s, 1H), 7.66 – 7.63 (m, 1H), 7.49 (d,  $J$  = 7.7 Hz, 2H), 7.39 (d,  $J$  = 8.4 Hz, 2H), 7.33 (t,  $J$  = 7.7 Hz, 1H), 7.16 (m,  $J$  = 7.5 Hz, 2H), 7.08 (t,  $J$  = 7.3 Hz, 1H), 4.20 (s, 3H), 1.23 (d,  $J$  = 7.1 Hz, 3H).  $^{13}\text{C NMR}$  (126 MHz, DMSO)  $\delta$  168.54, 154.11, 145.74, 142.85, 134.26, 131.50, 129.97, 126.64, 123.14, 114.88, 110.01, 61.74, 14.52. **HRMS** (ESI)  $m/z$ :  $[M+H]^+$  + calculated for  $\text{C}_{17}\text{H}_{15}\text{N}_3\text{O}_3$  310.1113; found: 310.1114.

#### 1-benzyl-3-(2-phenylhydrazineylidene)indolin-2-one (4n)

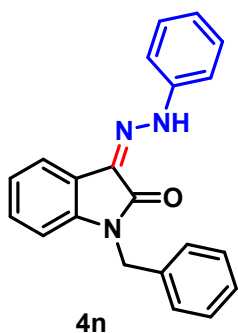

83% yield. Light brown solid. m.p.: 277-278 °C.  $^1\text{H NMR}$  (500 MHz, DMSO)  $\delta$  12.73 (s, 1H), 7.63 (d,  $J$  = 7.4 Hz, 1H), 7.49 (d,  $J$  = 7.7 Hz, 2H), 7.42 – 7.33 (m, 6H), 7.30 – 7.25 (m, 2H), 7.12 – 7.07 (m, 2H), 5.04 (s, 2H).  $^{13}\text{C NMR}$  (126 MHz, DMSO)  $\delta$  161.63, 142.91, 140.55, 136.84, 129.98, 129.19, 128.84, 128.00, 127.86, 123.66, 123.00, 121.05, 118.99, 114.80, 110.28, 42.80. **HRMS** (ESI)  $m/z$ :  $[M+H]^+$  + calculated for  $\text{C}_{21}\text{H}_{17}\text{N}_3\text{O}$  328.1372; found: 328.1374.

#### 5-chloro-1-ethyl-3-(2-phenylhydrazineylidene)indolin-2-one (4o)

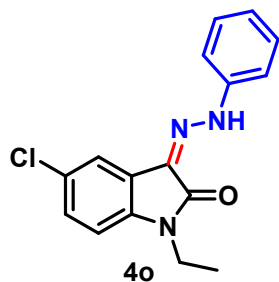

86% yield. Yellow solid. m.p.: 280-281 °C.  $^1\text{H NMR}$  (500 MHz, DMSO)  $\delta$  12.70 (s, 1H), 7.85 – 7.76 (m, 3H), 7.69 – 7.66 (m, 3H), 7.40 (m,  $J$  = 8.4 Hz, 1H), 7.22 (d,  $J$  = 8.4 Hz, 1H), 3.82 (d,  $J$  = 7.2 Hz, 2H), 1.21 (s, 3H).  $^{13}\text{C NMR}$  (126 MHz, DMSO)  $\delta$  160.74, 146.62, 139.97, 134.22, 129.24, 129.01, 127.29, 122.37, 119.72, 119.44, 115.47, 111.49, 104.90, 31.77, 13.23. **HRMS** (ESI)  $m/z$ :  $[M+H]^+$  + calculated for  $\text{C}_{16}\text{H}_{14}\text{ClN}_3\text{O}$

299.0825; found: 299.0823.

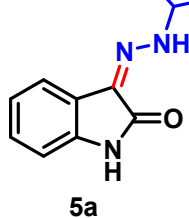

### 4-(2-(2-oxoindolin-3-ylidene)hydrazineyl)benzonitrile (5a)

93% yield. White solid. m.p.: 241-243°C.  $^1\text{H NMR}$  (500 MHz, DMSO)  $\delta$  12.76 (s, 1H), 11.12 (s, 1H), 7.82 – 7.78 (m, 2H), 7.61 – 7.57 (m, 3H), 7.32 – 7.28 (m, 1H), 7.08 (m,  $J = 7.6$  Hz, 1H), 6.93 (d,  $J = 7.8$  Hz, 1H).

$^{13}\text{C NMR}$  (126 MHz, DMSO)  $\delta$  163.33, 146.86, 141.26, 134.27, 131.15, 130.16, 122.59, 121.15, 119.91, 119.82, 114.95, 111.19, 104.24.

**HRMS** (ESI)  $m/z$ :  $[\text{M}+\text{H}]^+$  + calculated for  $\text{C}_{15}\text{H}_{10}\text{N}_4\text{O}$  263.0855; found: 263.0854.

### 3-(2-(4-nitrophenyl)hydrazineylidene)indolin-2-one (5b)

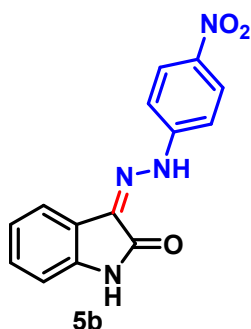

92% yield. Reddish solid. m.p.: 247-249 °C.  $^1\text{H NMR}$  (500 MHz, DMSO)  $\delta$  12.72 (s, 1H), 11.01 (s, 1H), 7.55 (d,  $J = 7.1$  Hz, 1H), 7.49 (m,  $J = 9.1$  Hz, 2H), 7.27 – 7.20 (m, 3H), 7.06 (m,  $J = 7.5$  Hz, 1H), 6.93 (d,  $J = 7.7$  Hz, 1H).

$^{13}\text{C NMR}$  (126 MHz, DMSO)  $\delta$  163.53, 140.30, 128.97, 128.12, 122.32, 121.65, 119.08, 116.66, 116.48, 116.16, 116.09, 110.96. **HRMS** (ESI)  $m/z$ :  $[\text{M}+\text{H}]^+$  + calculated for  $\text{C}_{14}\text{H}_{10}\text{N}_4\text{O}_3$  283.0753; found: 283.0754.

### 3-(2-(4-chlorophenyl)hydrazineylidene)indolin-2-one (5c)

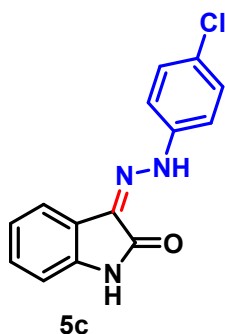

88% yield. White solid. m.p.: 255-256°C.  $^1\text{H NMR}$  (500 MHz, DMSO)  $\delta$  12.70 (s, 1H), 11.05 (s, 1H), 7.55 (d,  $J = 7.5$  Hz, 1H), 7.47 (m,  $J = 8.8$  Hz, 2H), 7.41 (d,  $J = 8.8$  Hz, 2H), 7.26 (td,  $J = 7.7$  Hz, 1H), 7.06 (td,  $J = 7.5$  Hz, 1H), 6.93 (d,  $J = 7.8$  Hz, 1H).  $^{13}\text{C NMR}$  (126 MHz, DMSO)  $\delta$  163.52, 142.09, 140.53, 129.75, 129.30, 128.86, 126.81, 122.42, 121.48, 119.30, 116.20, 111.05. **HRMS** (ESI)  $m/z$ :  $[\text{M}+\text{H}]^+$  + calculated for  $\text{C}_{14}\text{H}_{10}\text{ClN}_3\text{O}$  272.0512; found: 272.0513.

### 3-(2-(4-bromophenyl)hydrazineylidene)indolin-2-one (5d)

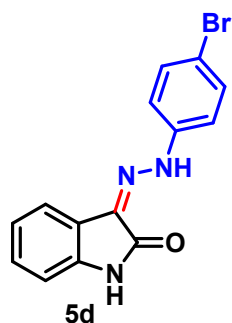

found: 316.0009.

89% yield. Yellowish solid. m.p.: 259-260 °C.  $^1\text{H NMR}$  (500 MHz, DMSO)  $\delta$  12.71 (s, 1H), 11.05 (s, 1H), 7.56 (d,  $J = 7.4$  Hz, 1H), 7.47 (d,  $J = 8.8$  Hz, 2H), 7.41 (m,  $J = 9.1$  Hz, 2H), 7.26 (m,  $J = 7.7$  Hz, 1H), 7.06 (m,  $J = 7.5$  Hz, 1H), 6.93 (d,  $J = 7.8$  Hz, 1H).  $^{13}\text{C NMR}$  (126 MHz, DMSO)  $\delta$  163.51, 142.11, 140.54, 129.75, 129.30, 128.86, 126.81, 122.41, 121.49, 119.30, 116.20, 111.05. **HRMS** (ESI)  $m/z$ :  $[\text{M}+\text{H}]^+$  calculated for  $\text{C}_{14}\text{H}_{10}\text{BrN}_3\text{O}$ ; 316.0007

### 3-(2-(4-fluorophenyl)hydrazineylidene)indolin-2-one (5e)

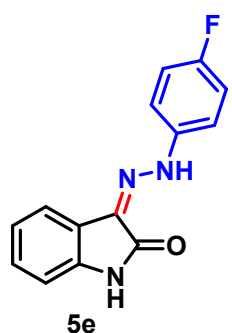

85% yield. White solid. m.p.: 248-249 °C.  $^1\text{H NMR}$  (500 MHz, DMSO)  $\delta$  12.72 (s, 1H), 11.01 (s, 1H), 7.55 (d,  $J = 7.2$  Hz, 1H), 7.51 – 7.46 (m, 2H), 7.27 – 7.20 (m, 3H), 7.06 (td,  $J = 7.5$  Hz, 1H), 6.93 (d,  $J = 7.8$  Hz, 1H).  $^{13}\text{C NMR}$  (126 MHz, DMSO)  $\delta$  163.53, 140.30, 139.71, 128.97, 122.32, 121.65, 119.08, 116.66, 116.48, 116.16, 116.09, 110.96.  $^{19}\text{F NMR}$  (471 MHz, DMSO)  $\delta$  -120.75. **HRMS** (ESI)  $m/z$ :  $[\text{M}+\text{H}]^+$  calculated for  $\text{C}_{14}\text{H}_{10}\text{FN}_3\text{O}$  256.0808; found: 256.0809.

### 3-(2-(2-chlorophenyl)hydrazineylidene)indolin-2-one (5f)

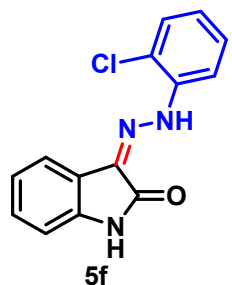

calculated for  $\text{C}_{14}\text{H}_{10}\text{ClN}_3\text{O}$  272.0512; found: 272.0514.

86% yield. White solid. m.p.: 257-258 °C.  $^1\text{H NMR}$  (500 MHz, DMSO)  $\delta$  13.11 (s, 1H), 11.17 (s, 1H), 7.82 (m,  $J = 8.2$  Hz, 1H), 7.61 (m,  $J = 7.5$  Hz, 1H), 7.51 (m,  $J = 8.0$  Hz, 1H), 7.45 – 7.40 (m, 1H), 7.31 (m,  $J = 7.7$  Hz, 1H), 7.11 – 7.04 (m, 2H), 6.96 (d,  $J = 7.8$  Hz, 1H).  $^{13}\text{C NMR}$  (126 MHz, DMSO)  $\delta$  163.83, 140.96, 139.25, 130.94, 130.09, 129.87, 129.06, 123.76, 122.57, 121.03, 119.71, 118.64, 114.60, 111.26. **HRMS** (ESI)  $m/z$ :  $[\text{M}+\text{H}]^+$

### 3-(2-(2-bromophenyl)hydrazineylidene)indolin-2-one (5g)



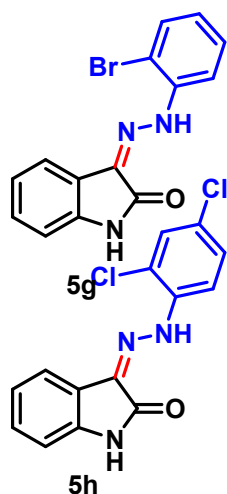

86% yield. Yellowish solid. m.p.: 264-265 °C.  $^1\text{H NMR}$  (500 MHz, DMSO)  $\delta$  13.11 (s, 1H), 11.17 (s, 1H), 7.82 (m,  $J = 8.2$  Hz, 1H), 7.61 (d,  $J = 7.1$  Hz, 1H), 7.51 (m,  $J = 8.0$  Hz, 1H), 7.45 – 7.40 (m, 1H), 7.31 (m,  $J = 7.7$  Hz, 1H), 7.12 – 7.05 (m, 2H), 6.96 (d,  $J = 7.8$  Hz, 1H).  $^{13}\text{C NMR}$  (126 MHz, DMSO)  $\delta$  163.84, 140.97, 139.27, 130.95, 130.10, 129.88, 129.08, 123.78, 122.58, 121.04, 119.72, 118.65, 114.61, 111.27. **HRMS** (ESI)  $m/z$ :  $[M+H]^+$  + calculated for  $\text{C}_{14}\text{H}_{10}\text{BrN}_3\text{O}$  316.0007; found: 316.0008.

### 3-(2-(2,4-dichlorophenyl)hydrazineylidene)indolin-2-one (5h)

83% yield. White solid. m.p.: 248-249 °C.  $^1\text{H NMR}$  (500 MHz, DMSO)  $\delta$  13.09 (s, 1H), 11.20 (s, 1H), 7.80 (d,  $J = 8.9$  Hz, 1H), 7.69 (d,  $J = 7.3$  Hz, 1H), 7.61 (d,  $J = 7.2$  Hz, 1H), 7.49 (m,  $J = 8.8$  Hz, 1H), 7.34 – 7.29 (m, 1H), 7.09 (m,  $J = 7.6$  Hz, 1H), 6.96 (d,  $J = 7.8$  Hz, 1H).  $^{13}\text{C NMR}$  (126 MHz, DMSO)  $\delta$  163.84, 141.17, 138.52, 131.61, 130.16, 129.43, 129.19, 126.50, 122.66, 120.85, 119.90, 119.19, 115.68, 111.34. **HRMS** (ESI)  $m/z$ :  $[M+H]^+$  + calculated for  $\text{C}_{14}\text{H}_9\text{Cl}_2\text{N}_3\text{O}$  306.0123; found: 306.0125.

### 3-(2-(2,4-dibromophenyl)hydrazineylidene)indolin-2-one (5i)

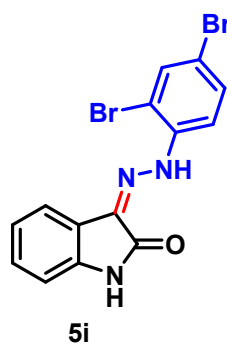

82% yield. White solid. m.p.: 237-238 °C.  $^1\text{H NMR}$  (500 MHz, DMSO)  $\delta$  13.09 (s, 1H), 11.20 (s, 1H), 7.80 (d,  $J = 8.9$  Hz, 1H), 7.69 (d,  $J = 2.3$  Hz, 1H), 7.61 (d,  $J = 7.4$  Hz, 1H), 7.49 (m,  $J = 8.8$  Hz, 1H), 7.32 (m,  $J = 7.7$  Hz, 1H), 7.09 (m,  $J = 7.5$  Hz, 1H), 6.96 (d,  $J = 7.8$  Hz, 1H).  $^{13}\text{C NMR}$  (126 MHz, DMSO)  $\delta$  163.84, 141.17, 138.53, 131.61, 130.17, 129.43, 129.19, 126.51, 122.66, 120.85, 119.90, 119.20, 115.69, 111.35. **HRMS** (ESI)  $m/z$ :  $[M+H]^+$  + calculated for  $\text{C}_{14}\text{H}_9\text{Br}_2\text{N}_3\text{O}$  393.9112; found: 393.9114.

### 3-(2-(3,4-dichlorophenyl)hydrazineylidene)indolin-2-one (5j)

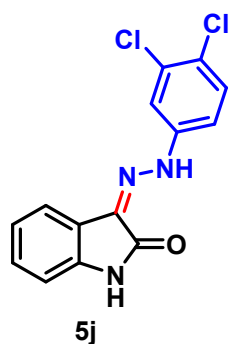

86% yield. White solid. m.p.: 238-239 °C.  $^1\text{H NMR}$  (500 MHz, DMSO)  $\delta$  13.09 (s, 1H), 11.20 (s, 1H), 7.80 (d,  $J = 8.9$  Hz, 1H), 7.69 (d,  $J = 2.3$  Hz, 1H), 7.61 (d,  $J = 7.4$  Hz, 1H), 7.49 (m,  $J = 8.8$  Hz, 1H), 7.32 (m,  $J = 7.7$  Hz, 1H), 7.09 (m,  $J = 7.5$  Hz, 1H), 6.96 (d,  $J = 7.8$  Hz, 1H).  $^{13}\text{C NMR}$  (126 MHz, DMSO)  $\delta$  163.84, 141.17, 138.53, 131.61, 130.17, 129.43, 129.19, 126.51, 122.66, 120.85, 119.90, 119.20, 115.69, 111.35. **HRMS** (ESI)  $m/z$ :  $[\text{M}+\text{H}]^+$  + calculated for  $\text{C}_{14}\text{H}_9\text{Cl}_2\text{N}_3\text{O}$  306.0123; found: 306.0124.

### 3-(2-(2,4-dimethylphenyl)hydrazineylidene)indolin-2-one (5k)

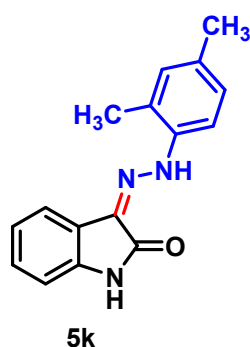

85% yield. Reddish solid. m.p.: 229-230 °C.  $^1\text{H NMR}$  (500 MHz, DMSO)  $\delta$  12.95 (s, 1H), 11.07 (s, 1H), 7.61 – 7.55 (m, 2H), 7.25 (m,  $J = 7.7$  Hz, 1H), 7.12 – 7.04 (m, 3H), 6.95 (d,  $J = 7.8$  Hz, 1H), 2.26 (d,  $J = 5.2$  Hz, 6H).  $^{13}\text{C NMR}$  (126 MHz, DMSO)  $\delta$  164.05, 140.01, 138.51, 132.10, 131.78, 128.75, 128.33, 128.28, 122.89, 122.34, 121.52, 118.95, 112.89, 111.05, 20.83, 16.77. **HRMS** (ESI)  $m/z$ :  $[\text{M}+\text{H}]^+$  + calculated for  $\text{C}_{16}\text{H}_{15}\text{N}_3\text{O}$  266.1215; found: 266.1216.

### 3-(2-(4-methoxyphenyl)hydrazineylidene)indolin-2-one (5l)

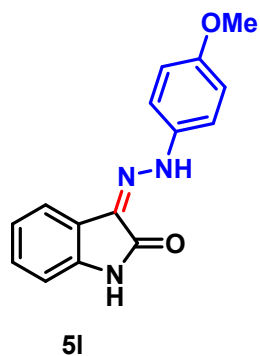

86% yield. Brick red solid. m.p.: 227-229 °C.  $^1\text{H NMR}$  (500 MHz, DMSO)  $\delta$  12.78 (s, 1H), 10.96 (s, 1H), 7.53 (d,  $J = 7.4$  Hz, 1H), 7.40 (d,  $J = 9.0$  Hz, 2H), 7.22 (t,  $J = 8.3$  Hz, 1H), 7.04 (m,  $J = 9.3$  Hz, 1H), 6.97 (d,  $J = 9.0$  Hz, 2H), 6.92 (d,  $J = 7.8$  Hz, 1H), 3.76 (s, 3H).  $^{13}\text{C NMR}$  (126 MHz, DMSO)  $\delta$  163.66, 156.03, 139.81, 136.65, 128.39, 126.82, 122.18, 121.86, 118.70, 115.93, 115.28, 110.86, 55.81. **HRMS** (ESI)  $m/z$ :  $[\text{M}+\text{H}]^+$  + calculated for  $\text{C}_{15}\text{H}_{13}\text{N}_3\text{O}_2$  268.1008; found: 268.1009.

### 3-(2-(3,4-dimethylphenyl)hydrazineylidene)indolin-2-one (5m)

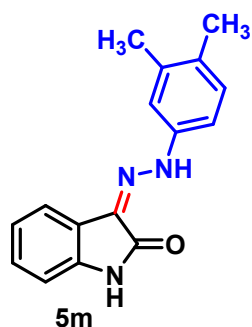

86% yield. White solid. m.p.: 238-239 °C.  $^1\text{H NMR}$  (500 MHz, DMSO)  $\delta$  12.95 (s, 1H), 11.07 (s, 1H), 7.60 – 7.55 (m, 2H), 7.25 (m,  $J = 7.7$  Hz, 1H), 7.09 (m,  $J = 7.1$  Hz, 1H), 7.06 (m,  $J = 7.6$  Hz, 2H), 6.95 (d,  $J = 7.8$  Hz, 1H), 2.26 (d,  $J = 5.2$  Hz, 6H).  $^{13}\text{C NMR}$  (126 MHz, DMSO)  $\delta$  164.05, 140.01, 138.51, 132.10, 131.78, 128.75, 128.33, 128.28, 122.89, 122.34, 121.52, 118.95, 112.89, 111.05, 20.83, 16.78. **HRMS** (ESI)  $m/z$ :  $[M+H]^+$  calculated for  $\text{C}_{16}\text{H}_{15}\text{N}_3\text{O}$  266.1215; found: 266.1217.

### 3-(2-(4-isopropylphenyl)hydrazineylidene)indolin-2-one (5n)

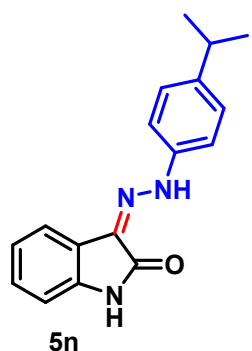

88% yield. White solid. m.p.: 228-229°C.  $^1\text{H NMR}$  (500 MHz, DMSO)  $\delta$  12.78 (s, 1H), 11.13 (s, 1H), 7.55 (d,  $J = 7.1$  Hz, 1H), 7.41 (d,  $J = 8.6$  Hz, 2H), 7.26 (m,  $J = 8.6$  Hz, 4H), 6.93 (d,  $J = 8.3$  Hz, 1H), 2.91 – 2.85 (m, 1H), 1.21 (d,  $J = 6.9$  Hz, 6H).  $^{13}\text{C NMR}$  (126 MHz, DMSO)  $\delta$  163.47, 144.23, 140.71, 138.56, 127.95, 127.74, 126.51, 126.30, 123.54, 118.43, 115.02, 112.33, 33.34, 24.42. **HRMS** (ESI)  $m/z$ :  $[M+H]^+$  calculated for  $\text{C}_{16}\text{H}_{15}\text{N}_3\text{O}$  279.1372; found: 279.1374.

### 3-(2-(mesityl)hydrazineylidene)indolin-2-one (5o)

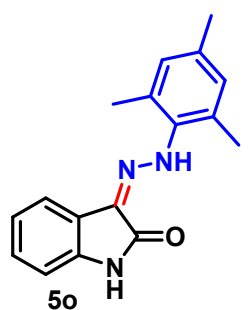

82% yield. White solid. m.p.: 231-232 °C.  $^1\text{H NMR}$  (500 MHz, DMSO)  $\delta$  12.76 (s, 1H), 11.02 (s, 1H), 7.24 (m,  $J = 8.4$  Hz, 1H), 7.06 – 7.01 (m, 1H), 6.95 – 6.90 (m, 3H), 2.36 (s, 6H), 2.24 (s, 3H).  $^{13}\text{C NMR}$  (126 MHz, DMSO)  $\delta$  163.51, 138.06, 136.50, 134.15, 130.42, 128.50, 127.54, 126.43, 125.87, 123.72, 117.80, 112.33, 20.82, 19.37. **HRMS** (ESI)  $m/z$ :  $[M+H]^+$  calculated for  $\text{C}_{17}\text{H}_{17}\text{N}_3\text{O}$  279.1372; found: 279.1375.

### 3-(2-(benzo[d]thiazol-2-yl)hydrazineylidene)indolin-2-one (5p)

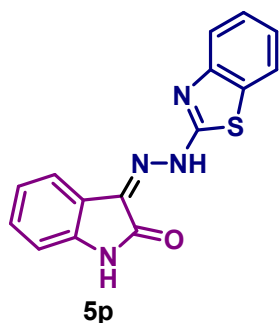

83% yield. Brick red solid. m.p.: 270-272 °C.  $^1\text{H NMR}$  (500 MHz, DMSO)  $\delta$  12.13 (s, 1H), 11.04 (s, 1H), 7.59 (m,  $J = 7.7$  Hz, 2H), 7.51 (m,  $J = 7.4$  Hz, 2H), 7.07 (m,  $J = 7.4$  Hz, 2H), 6.91 (m,  $J = 7.9$  Hz, 2H).  $^{13}\text{C NMR}$  (126 MHz, DMSO)  $\delta$  184.86, 159.83, 151.19, 138.84, 136.28, 127.58, 125.16, 123.23, 118.30, 112.67.

#### 1-benzylidene-2-phenylhydrazine (6a)

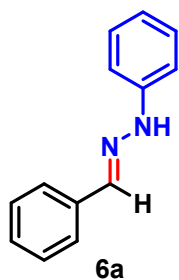

86% yield. White solid. m.p.: 210-212 °C.  $^1\text{H NMR}$  (500 MHz, DMSO)  $\delta$  10.34 (s, 1H), 7.86 (s, 1H), 7.67 – 7.63 (m, 2H), 7.39 (t,  $J = 7.6$  Hz, 2H), 7.29 (t,  $J = 7.3$  Hz, 1H), 7.22 (m,  $J = 7.4$  Hz, 2H), 7.08 (d,  $J = 1.0$  Hz, 2H), 6.75 (t,  $J = 7.3$  Hz, 1H).  $^{13}\text{C NMR}$  (126 MHz, DMSO)  $\delta$  145.75, 136.87, 136.30, 129.59, 129.12, 128.38, 126.08, 119.21, 112.44. **HRMS** (ESI)  $m/z$ :  $[\text{M}+\text{H}]^+$  + calculated for  $\text{C}_{13}\text{H}_{12}\text{N}_2$  197.1000; found: 197.1002.

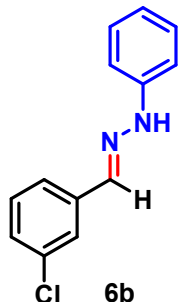

#### 1-(3-chlorobenzylidene)-2-phenylhydrazine (6b)

90% yield. Light brown. m.p.: 215-216 °C.  $^1\text{H NMR}$  (500 MHz, DMSO)  $\delta$  10.52 (s, 1H), 7.83 (s, 1H), 7.70 (s, 1H), 7.60 (d,  $J = 7.7$  Hz, 1H), 7.41 (t,  $J = 7.8$  Hz, 1H), 7.33 (d,  $J = 5.8$  Hz, 1H), 7.26 – 7.21 (m, 2H), 7.09 (d,  $J = 7.5$  Hz, 2H), 6.78 (t,  $J = 7.3$  Hz, 1H).  $^{13}\text{C NMR}$  (126 MHz, DMSO)  $\delta$  145.42, 138.65, 135.03, 134.01, 130.97, 129.63, 127.87, 124.68, 112.63. **HRMS** (ESI)  $m/z$ :  $[\text{M}+\text{H}]^+$  + calculated for  $\text{C}_{13}\text{H}_{11}\text{ClN}_2$  231.0611; found: 231.0613.

#### 1-(2,4-dichlorobenzylidene)-2-phenylhydrazine (6c)

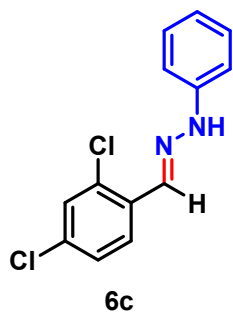

87% yield. Cream solid. m.p.: 219-221 °C.  $^1\text{H NMR}$  (500 MHz, DMSO)  $\delta$  10.80 (s, 1H), 8.14 (s, 1H), 8.02 (d,  $J = 8.6$  Hz, 1H), 7.62 (d,  $J = 2.1$  Hz, 1H), 7.44 (d,  $J = 8.6$  Hz, 1H), 7.27 – 7.23 (m, 2H), 7.10 (d,  $J = 7.6$  Hz, 2H), 6.81 (t,  $J = 7.3$  Hz, 1H).  $^{13}\text{C NMR}$  (126 MHz, DMSO)  $\delta$  145.08, 132.09, 131.24, 129.69, 129.56, 128.18, 127.40, 120.02, 112.74. **HRMS** (ESI)  $m/z$ :  $[\text{M}+\text{H}]^+$  + calculated for  $\text{C}_{13}\text{H}_{10}\text{Cl}_2\text{N}_2$  265.0221; found: 265.0222.

### 1-(3,4-dichlorobenzylidene)-2-phenylhydrazine (6d)

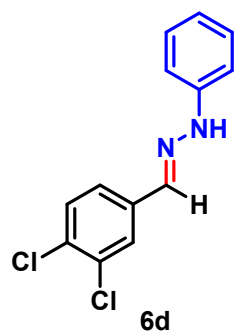

87% yield. White solid. m.p.: 216-218 °C.  $^1\text{H NMR}$  (500 MHz, DMSO)  $\delta$  10.81 (s, 1H), 8.14 (s, 1H), 8.02 (d,  $J = 8.6$  Hz, 1H), 7.63 (d,  $J = 7.1$  Hz, 1H), 7.44 (m,  $J = 8.6$  Hz, 1H), 7.27 – 7.21 (m, 2H), 7.10 (d,  $J = 7.6$  Hz, 2H), 6.81 (t,  $J = 7.3$  Hz, 1H).  $^{13}\text{C NMR}$  (126 MHz, DMSO)  $\delta$  145.07, 132.88, 132.54, 132.09, 131.23, 129.70, 129.57, 128.20, 127.40, 120.02, 112.73. **HRMS** (ESI)  $m/z$ :  $[\text{M}+\text{H}]^+$  calculated for  $\text{C}_{13}\text{H}_{10}\text{Cl}_2\text{N}_2$  265.0221; found: 265.0223.

### 1-(3-bromobenzylidene)-2-phenylhydrazine (6e)

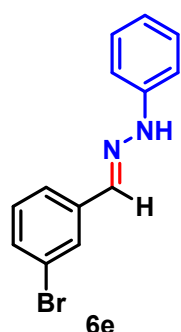

92% yield. White solid. m.p.: 213-215 °C.  $^1\text{H NMR}$  (500 MHz, DMSO)  $\delta$  10.53 (s, 1H), 7.83 (s, 1H), 7.71 – 7.69 (m, 1H), 7.60 (d,  $J = 7.8$  Hz, 1H), 7.41 (t,  $J = 7.8$  Hz, 1H), 7.33 (m,  $J = 7.9$  Hz, 1H), 7.26 – 7.21 (m, 2H), 7.09 (m,  $J = 8.6$  Hz, 2H), 6.78 (m,  $J = 13.5$  Hz, 1H).  $^{13}\text{C NMR}$  (126 MHz, DMSO)  $\delta$  145.40, 138.63, 135.01, 133.99, 130.96, 129.62, 127.86, 125.24, 124.67, 119.59, 112.61. **HRMS** (ESI)  $m/z$ :  $[\text{M}+\text{H}]^+$  calculated for  $\text{C}_{13}\text{H}_{11}\text{BrN}_2$  275.0106; found: 275.0107.

### 1-(2,4-dibromobenzylidene)-2-phenylhydrazine (6f)

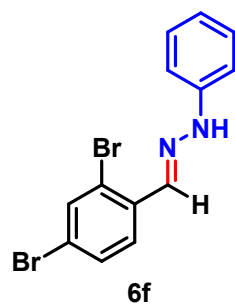

88% yield. White solid. m.p.: 217-219 °C.  $^1\text{H NMR}$  (500 MHz, DMSO)  $\delta$  10.81 (s, 1H), 8.14 (s, 1H), 8.02 (d,  $J = 8.6$  Hz, 1H), 7.63 (d,  $J = 8.1$  Hz, 1H), 7.44 (m,  $J = 8.6$  Hz, 1H), 7.25 (m,  $J = 7.4$  Hz, 2H), 7.12 – 7.08 (m, 2H), 6.81 (t,  $J = 7.3$  Hz, 1H).  $^{13}\text{C NMR}$  (126 MHz, DMSO)  $\delta$  145.05, 132.88, 132.53, 132.08, 131.22, 129.68, 129.56, 128.18, 127.39, 120.02, 112.72. **HRMS** (ESI)  $m/z$ :  $[\text{M}+\text{H}]^+$  calculated for  $\text{C}_{13}\text{H}_{10}\text{Br}_2\text{N}_2$  352.9211; found: 352.9210.

### 1-(4-nitrobenzylidene)-2-phenylhydrazine (6g)

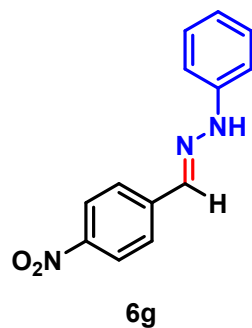

93% yield. Reddish brown solid. m.p.: 205-207 °C.  $^1\text{H NMR}$  (500 MHz, DMSO)  $\delta$  11.38 (s, 1H), 8.28 – 8.23 (m, 2H), 8.05 (s, 1H), 7.96 (d,  $J = 9.4$  Hz, 2H), 7.68 (d,  $J = 8.9$  Hz, 2H), 7.25 (d,  $J = 8.7$  Hz, 2H).  $^{13}\text{C NMR}$  (126 MHz, DMSO)  $\delta$  148.46, 147.29, 142.20, 137.68, 134.24, 127.31, 124.40, 120.32, 113.08. **HRMS** (ESI)  $m/z$ :  $[\text{M}+\text{H}]^+$  calculated for  $\text{C}_{13}\text{H}_{11}\text{N}_3\text{O}_2$  242.0851; found: 242.0853.

### 1-(3-nitrobenzylidene)-2-phenylhydrazine (6h)

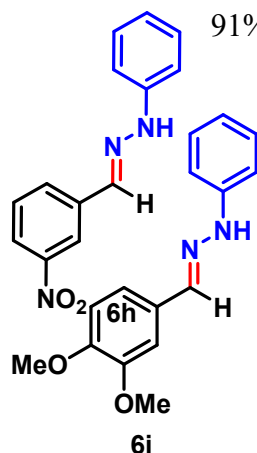

91% yield. Red solid. m.p.: 208-209 °C.  $^1\text{H NMR}$  (500 MHz, DMSO)  $\delta$  10.69 (s, 1H), 8.45 – 8.43 (m, 1H), 8.12 – 8.08 (m, 2H), 7.97 (s, 1H), 7.66 (t,  $J = 8.0$  Hz, 1H), 7.26 (t,  $J = 7.8$  Hz, 2H), 7.13 (d,  $J = 7.8$  Hz, 2H), 6.81 (d,  $J = 7.2$  Hz, 1H).  $^{13}\text{C NMR}$  (126 MHz, DMSO)  $\delta$  148.78, 145.21, 138.33, 134.21, 130.60, 129.67, 122.41, 119.96, 119.90, 112.74. **HRMS** (ESI)  $m/z$ :  $[\text{M}+\text{H}]^+$  + calculated for  $\text{C}_{13}\text{H}_{11}\text{N}_3\text{O}_2$  242.0851; found: 242.0853.

### 1-(3,4-dimethoxybenzylidene)-2-phenylhydrazine (6i)

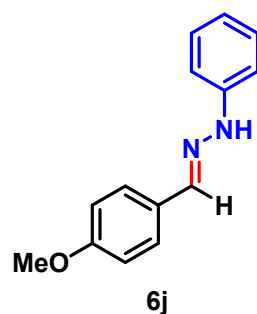

85% yield. White solid. m.p.: 198-200 °C.  $^1\text{H NMR}$  (500 MHz, DMSO)  $\delta$  9.88 (s, 1H), 7.92 – 7.86 (m, 4H), 7.16 – 7.11 (m, 3H), 7.02 (d,  $J = 9.0$  Hz, 1H), 3.85 (d,  $J = 21.8$  Hz, 6H).  $^{13}\text{C NMR}$  (126 MHz, DMSO)  $\delta$  167.48, 164.70, 163.30, 132.27, 131.80, 130.14, 123.48, 114.98, 114.27, 56.15, 55.89. **HRMS** (ESI)  $m/z$ :  $[\text{M}+\text{H}]^+$  + calculated for  $\text{C}_{15}\text{H}_{16}\text{N}_2\text{O}_2$  257.1212; found: 257.1215.

### 1-(4-methoxybenzylidene)-2-phenylhydrazine (6j)

86% yield. Cream solid. m.p.: 201-203 °C.  $^1\text{H NMR}$  (500 MHz, DMSO)  $\delta$  10.81 (s, 1H), 7.93 (s, 1H), 7.65 (d,  $J = 6.8$  Hz, 2H), 7.61 (s, 2H), 7.13 (s, 2H), 7.00 (d,  $J = 4.7$  Hz, 2H), 3.80 (s, 3H).  $^{13}\text{C NMR}$  (126 MHz, DMSO)  $\delta$  160.35, 149.18, 140.65, 133.51, 127.95, 120.79, 114.69, 112.27, 55.78. **HRMS** (ESI)  $m/z$ :  $[\text{M}+\text{H}]^+$  + calculated for  $\text{C}_{14}\text{H}_{14}\text{N}_2\text{O}$  227.1106; found: 227.1108.

### 4-(2-(4-methoxybenzylidene)hydrazineyl)benzonitrile (6k)

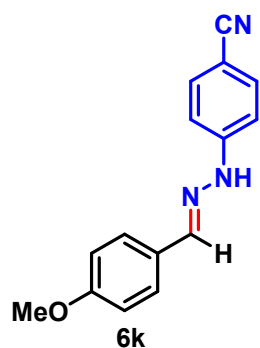

89% yield. Whitish brown solid. m.p.: 231-232 °C. <sup>1</sup>H NMR (500 MHz, DMSO) δ 10.81 (s, 1H), 7.93 (s, 1H), 7.66 – 7.64 (m, 2H), 7.60 (d, *J* = 9.0 Hz, 2H), 7.12 (d, *J* = 8.6 Hz, 2H), 7.00 – 6.97 (m, 2H), 3.80 (s, 3H).

<sup>13</sup>C NMR (126 MHz, DMSO) δ 160.45, 149.26, 140.65, 134.10, 128.21, 128.09, 120.67, 114.73, 112.34, 99.23, 55.72. HRMS (ESI) *m/z*: [M+H]<sup>+</sup> + calculated for C<sub>15</sub>H<sub>13</sub>N<sub>3</sub>O 252.1059; found: 252.1057.

#### 4-(2-(4-nitrobenzylidene)hydrazinyl)benzonitrile (6l)

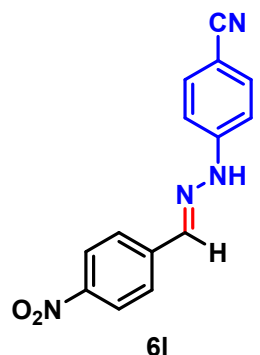

90% yield. Dark orange solid. m.p.: 224-225 °C. <sup>1</sup>H NMR (500 MHz, DMSO) δ 11.38 (s, 1H), 8.25 (d, *J* = 8.9 Hz, 2H), 8.05 (s, 1H), 7.96 (d, *J* = 8.9 Hz, 2H), 7.68 (d, *J* = 8.9 Hz, 2H), 7.25 (d, *J* = 8.7 Hz, 2H).

<sup>13</sup>C NMR (126 MHz, DMSO) δ 148.46, 147.23, 142.08, 137.83, 134.24, 127.31, 124.53, 120.32, 113.20, 101.07. HRMS (ESI) *m/z*: [M+H]<sup>+</sup> + calculated for C<sub>14</sub>H<sub>10</sub>N<sub>4</sub>O<sub>2</sub> 267.0804; found: 267.0807.

#### 1-benzylidene-2-(2-chlorophenyl)hydrazine (6m)

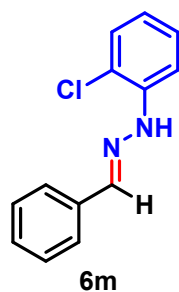

85% yield. White solid. m.p.: 213-215 °C. <sup>1</sup>H NMR (500 MHz, DMSO) δ 9.90 (s, 1H), 8.30 (s, 1H), 7.68 (d, *J* = 7.2 Hz, 2H), 7.58 (d, *J* = 8.2 Hz, 1H), 7.42 (t, *J* = 7.5 Hz, 2H), 7.34 (t, *J* = 6.6 Hz, 2H), 7.27 (t, *J* = 8.2 Hz, 1H), 6.82 – 6.78 (m, 1H).

<sup>13</sup>C NMR (126 MHz, DMSO) δ 141.88, 140.85, 135.91, 129.83, 129.21, 129.03, 128.53, 126.50, 120.10, 116.65, 114.52. HRMS (ESI) *m/z*: [M+H]<sup>+</sup> + calculated for C<sub>13</sub>H<sub>11</sub>ClN<sub>2</sub> 231.0611; found: 231.0614.

#### 1-benzylidene-2-(4-chlorophenyl)hydrazine (6n)

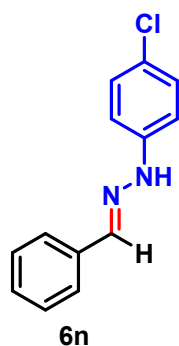

86% yield. White solid. m.p.: 217-218 °C.  $^1\text{H NMR}$  (500 MHz, DMSO)  $\delta$  10.47 (s, 1H), 7.88 (s, 1H), 7.67 – 7.64 (m, 2H), 7.40 (m,  $J = 7.6$  Hz, 2H), 7.32 (m,  $J = 8.1$  Hz, 1H), 7.27 – 7.23 (m, 2H), 7.10 – 7.06 (m, 2H).  $^{13}\text{C NMR}$  (126 MHz, DMSO)  $\delta$  144.70, 137.79, 136.04, 129.39, 129.13, 128.64, 126.23, 122.43, 113.88. **HRMS** (ESI)  $m/z$ :  $[\text{M}+\text{H}]^+$  + calculated for  $\text{C}_{13}\text{H}_{11}\text{ClN}_2$  231.0611; found: 231.0608.

### 1-benzylidene-2-(2,4-dichlorophenyl)hydrazine (6o)

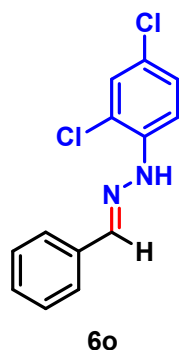

84% yield. White solid. m.p.: 223-224 °C.  $^1\text{H NMR}$  (500 MHz, DMSO)  $\delta$  10.05 (s, 1H), 8.31 (s, 1H), 7.70 – 7.66 (m, 2H), 7.57 (d,  $J = 8.9$  Hz, 1H), 7.47 (d,  $J = 8.3$  Hz, 1H), 7.42 (t,  $J = 7.5$  Hz, 2H), 7.36 (d,  $J = 7.4$  Hz, 1H), 7.33 – 7.30 (m, 1H).  $^{13}\text{C NMR}$  (126 MHz, DMSO)  $\delta$  141.61, 141.11, 135.68, 129.24, 129.22, 129.06, 128.54, 126.62, 122.67, 117.11, 115.52. **HRMS** (ESI)  $m/z$ :  $[\text{M}+\text{H}]^+$  + calculated for  $\text{C}_{13}\text{H}_{10}\text{Cl}_2\text{N}_2$  265.0221; found: 265.0224.

### 1-benzylidene-2-(2-bromophenyl)hydrazine (6p)

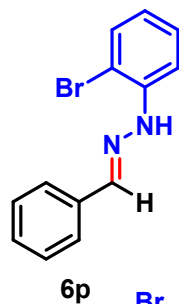

86% yield. White solid. m.p.: 218-219 °C.  $^1\text{H NMR}$  (500 MHz, DMSO)  $\delta$  9.89 (s, 1H), 8.30 (s, 1H), 7.68 (d,  $J = 9.3$  Hz, 2H), 7.60 – 7.57 (m, 1H), 7.42 (t,  $J = 7.5$  Hz, 2H), 7.34 (t,  $J = 8.5$  Hz, 2H), 7.27 (t,  $J = 7.7$  Hz, 1H), 6.83 – 6.77 (m, 1H).  $^{13}\text{C NMR}$  (126 MHz, DMSO)  $\delta$  141.95, 140.85, 135.91, 129.75, 129.28, 129.03, 128.53, 126.50, 120.10, 116.75, 114.64. **HRMS** (ESI)  $m/z$ :  $[\text{M}+\text{H}]^+$  + calculated for  $\text{C}_{13}\text{H}_{11}\text{BrN}_2$  275.0106; found: 275.0108.

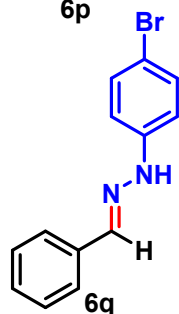

### 1-benzylidene-2-(4-bromophenyl)hydrazine (6q)

89% yield. White solid. m.p.: 227-228 °C.  $^1\text{H NMR}$  (500 MHz, DMSO)  $\delta$  10.47 (s, 1H), 7.88 (s, 1H), 7.68 – 7.63 (m, 2H), 7.39 (t,  $J = 6.8$  Hz, 2H), 7.33 – 7.28 (m, 1H), 7.25 (d,  $J = 8.9$  Hz, 2H), 7.07 (d,  $J = 8.9$  Hz, 2H).  $^{13}\text{C NMR}$  (126 MHz, DMSO)  $\delta$  144.68, 137.79, 136.04, 129.39, 129.06, 128.55, 126.23, 122.36, 113.95. **HRMS** (ESI)  $m/z$ :  $[\text{M}+\text{H}]^+$  + calculated for  $\text{C}_{13}\text{H}_{11}\text{BrN}_2$  275.0106; found: 275.0107.

### 1-benzylidene-2-(2,4-dibromophenyl)hydrazine (6r)



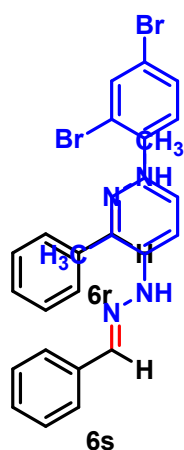

87% yield. White solid. m.p.: 228-229 °C.  $^1\text{H NMR}$  (500 MHz, DMSO)  $\delta$  10.05 (s, 1H), 8.31 (s, 1H), 7.68 (d,  $J = 8.5$  Hz, 2H), 7.57 (d,  $J = 8.9$  Hz, 1H), 7.47 (s, 1H), 7.44 – 7.40 (m, 2H), 7.37 – 7.33 (m, 1H), 7.31 (d,  $J = 8.9$  Hz, 1H).  $^{13}\text{C NMR}$  (126 MHz, DMSO)  $\delta$  141.61, 141.11, 135.78, 129.24, 128.99, 128.45, 126.74, 122.61, 117.19, 115.52. **HRMS** (ESI)  $m/z$ :  $[\text{M}+\text{H}]^+$  + calculated for  $\text{C}_{13}\text{H}_{10}\text{Br}_2\text{N}_2$  352.9211; found: 352.9210.

#### 1-benzylidene-2-(2,4-dimethylphenyl)hydrazine (6s)

86% yield. Cream solid. m.p.: 216-218 °C.  $^1\text{H NMR}$  (500 MHz, DMSO)  $\delta$  10.38 (d,  $J = 8.0$  Hz, 1H), 7.93 (m,  $J = 8.3$  Hz, 2H), 7.58 (d,  $J = 7.4$  Hz, 1H), 7.54 – 7.50 (m, 2H), 7.12 (d,  $J = 3.0$  Hz, 1H), 6.87 – 6.81 (m, 2H), 6.63 (d,  $J = 8.1$  Hz, 1H), 2.18 (d,  $J = 11.9$  Hz, 6H).  $^{13}\text{C NMR}$  (126 MHz, DMSO)  $\delta$  166.59, 145.01, 133.54, 132.05, 131.18, 128.95, 127.83, 127.72, 127.16, 122.63, 111.97, 20.57, 17.67. **HRMS** (ESI)  $m/z$ :  $[\text{M}+\text{H}]^+$  + calculated for  $\text{C}_{15}\text{H}_{16}\text{N}_2$  225.1313; found: 225.1315.

#### 1-benzylidene-2-(4-fluorophenyl)hydrazine (6t)

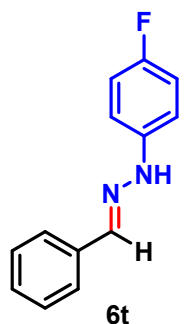

80% yield. White solid. m.p.: 210-211 °C.  $^1\text{H NMR}$  (500 MHz, DMSO)  $\delta$  10.47 (s, 1H), 7.88 (s, 1H), 7.68 – 7.64 (m, 2H), 7.40 (m,  $J = 7.6$  Hz, 2H), 7.33 – 7.28 (m, 1H), 7.28 – 7.24 (m, 2H), 7.10 – 7.05 (m, 2H).  $^{13}\text{C NMR}$  (126 MHz, DMSO)  $\delta$  144.63, 137.79, 136.04, 129.45, 129.26, 128.64, 126.23, 122.43, 113.98.  $^{19}\text{F NMR}$  (471 MHz, DMSO)  $\delta$  -121.65, -121.66.

#### 1-(naphthalen-1-ylmethylene)-2-phenylhydrazine (6u)

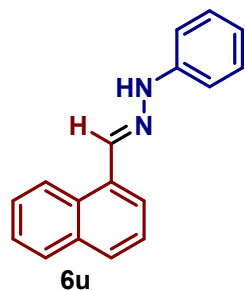

81% yield. Brown solid. m.p.: 79-80 °C.  $^1\text{H NMR}$  (500 MHz, DMSO)  $\delta$  10.41 (s, 1H), 9.17 (d,  $J = 8.5$  Hz, 2H), 8.27 (d,  $J = 8.2$  Hz, 2H), 8.18 (d,  $J = 7.1$  Hz, 2H), 8.07 (d,  $J = 8.2$  Hz, 1H), 7.78 – 7.69 (m, 4H), 7.65 (t,  $J = 6.9$  Hz, 2H).  $^{13}\text{C NMR}$  (126 MHz, DMSO)  $\delta$  152.30, 137.22, 135.71, 133.79, 131.34, 130.25, 129.48, 129.18, 127.38, 125.84, 124.60.

#### 1-phenyl-2-(thiophen-2-ylmethylene)hydrazine(6v)

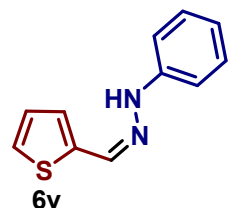

78% yield. White solid. m.p.: 145-147 °C.  $^1\text{H NMR}$  (500 MHz, DMSO)  $\delta$  10.30 (s, 1H), 8.06 (s, 1H), 7.46 (d,  $J = 5.0$  Hz, 1H), 7.21 (s, 3H), 7.06 (m,  $J =$

7.9 Hz, 1H), 6.99 (d,  $J = 7.7$  Hz, 2H), 6.74 (t,  $J = 7.3$  Hz, 1H).  $^{13}\text{C}$  NMR (126 MHz, DMSO)  $\delta$  145.52, 141.39, 132.47, 129.60, 128.05, 127.04, 126.21, 119.23, 112.34.

### 2-(2-benzylidenehydrazineyl)benzo[d]thiazole (6w)

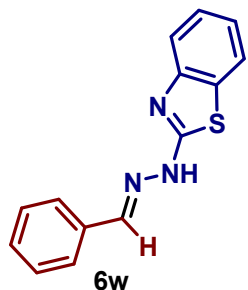

83% yield. Brown solid. m.p.: 190-191 °C.  $^1\text{H}$  NMR (500 MHz, DMSO)  $\delta$  12.49 (s, 1H), 8.44 (s, 2H), 7.55 (d,  $J = 8.1$  Hz, 2H), 7.36 (m,  $J = 7.9$  Hz, 2H), 7.21 (m,  $J = 7.7$  Hz, 2H), 7.15 (d,  $J = 7.9$  Hz, 2H).  $^{13}\text{C}$  NMR (126 MHz, DMSO)  $\delta$  161.36, 151.06, 145.30, 138.70, 130.06, 128.73, 125.96, 123.54, 111.81.

### Intermediate E (benzaldehyde)

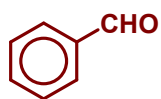

$^1\text{H}$  NMR (500 MHz, DMSO)  $\delta$  8.73 (s, 1H), 7.92 – 7.88 (m, 2H), 7.53 (m,  $J = 7.5$  Hz, 3H).  $^{13}\text{C}$  NMR (126 MHz, DMSO)  $\delta$  161.97, 134.27, 131.86, 129.41, 128.84.

### Intermediate VI (indoline-2,3-dione)

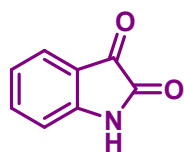

$^1\text{H}$  NMR (500 MHz, DMSO)  $\delta$  11.22 (s, 1H), 7.88 (s, 1H), 7.59 – 7.51 (m, 1H), 7.10 (d,  $J = 7.6$  Hz, 1H), 6.94 (s, 1H).  $^{13}\text{C}$  NMR (126 MHz, DMSO)  $\delta$  182.16, 164.21, 151.08, 146.87, 138.05, 126.28, 123.61.

## 4.3 $^1\text{H}$ and $^{13}\text{C}$ NMR spectra

### 3-(2-phenylhydrazineylidene)indolin-2-one (4a)

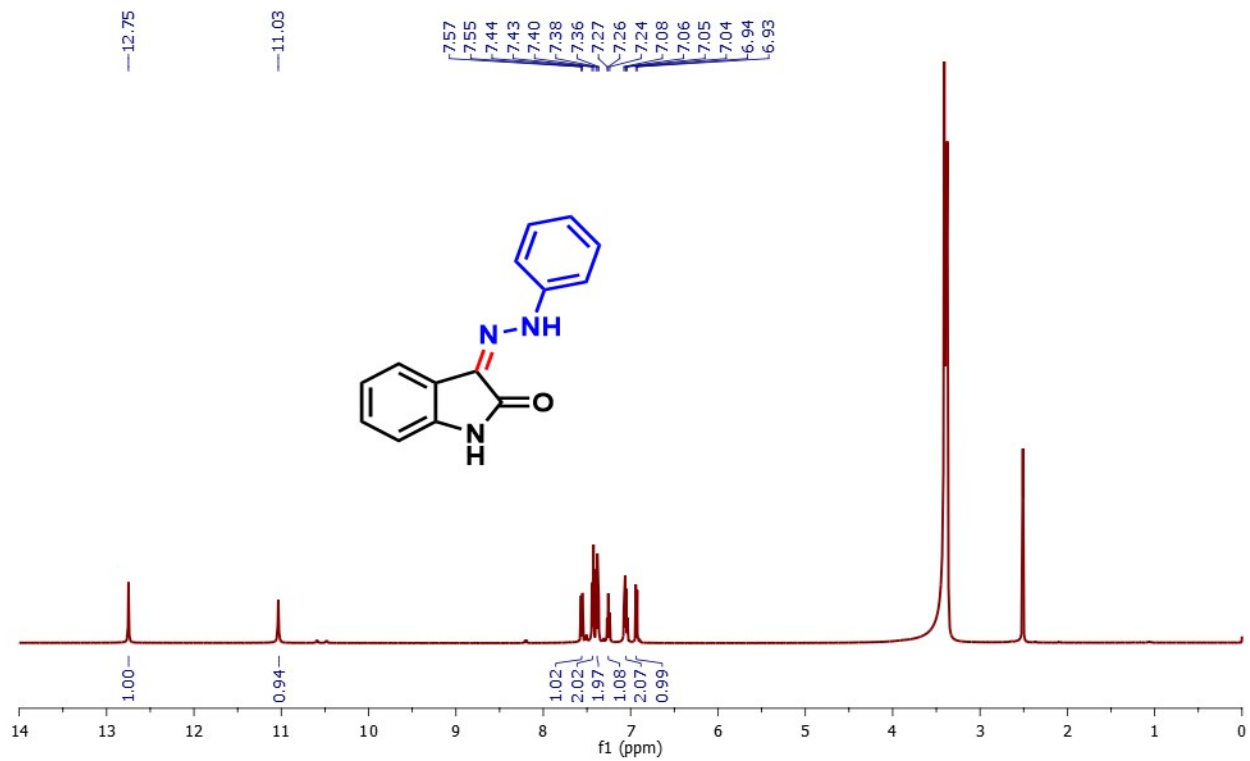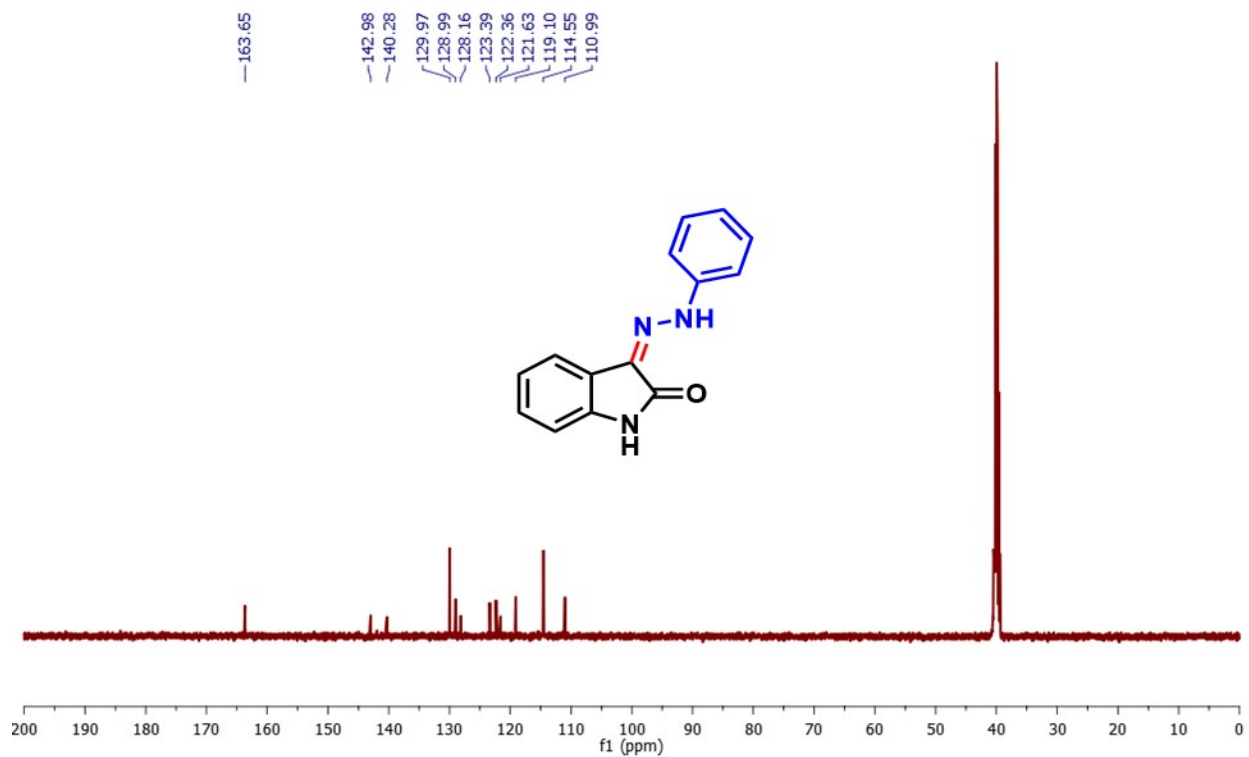

**5-nitro-3-(2-phenylhydrazineylidene)indolin-2-one (4b)**

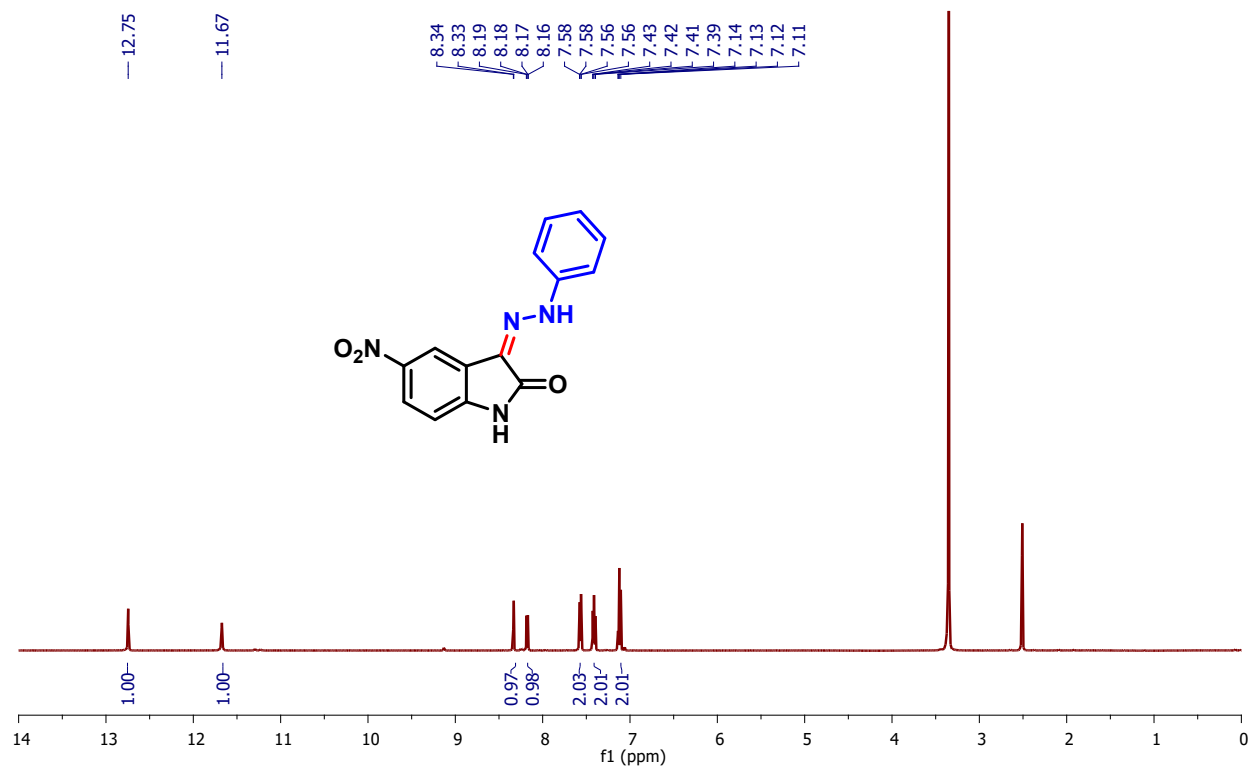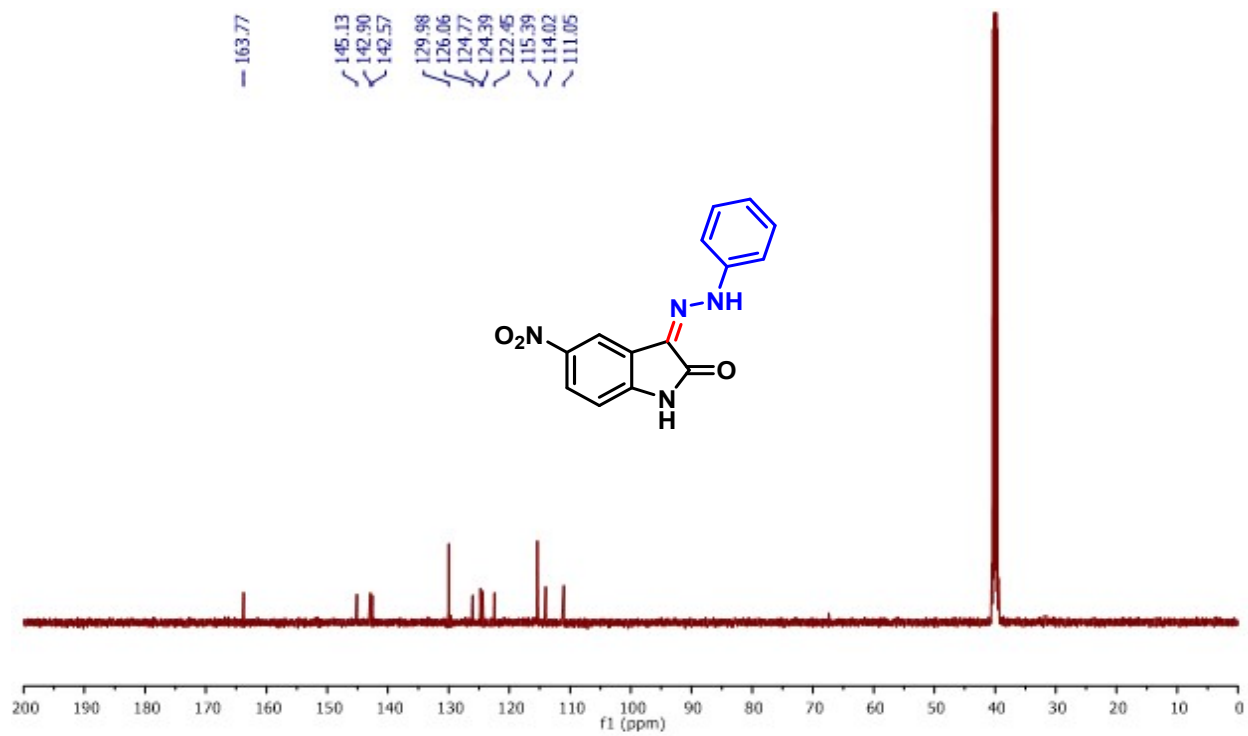

5-chloro-3-(2-phenylhydrazineylidene)indolin-2-one (4c)

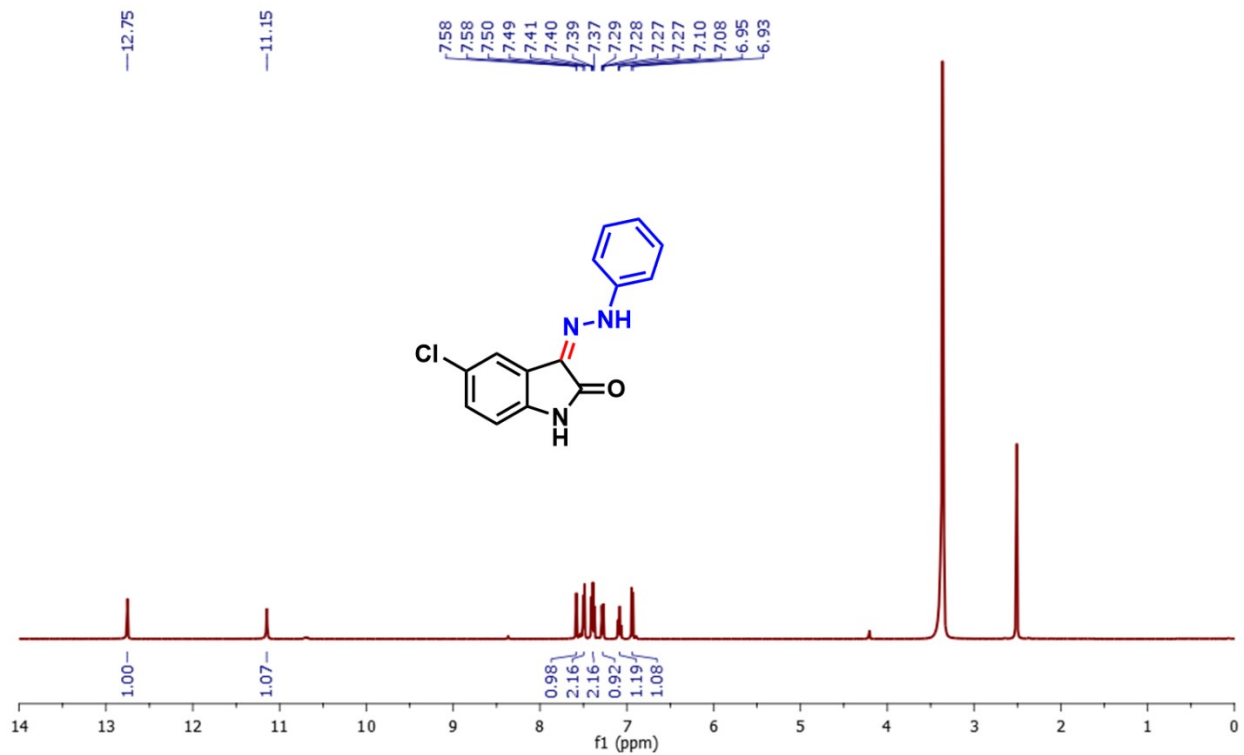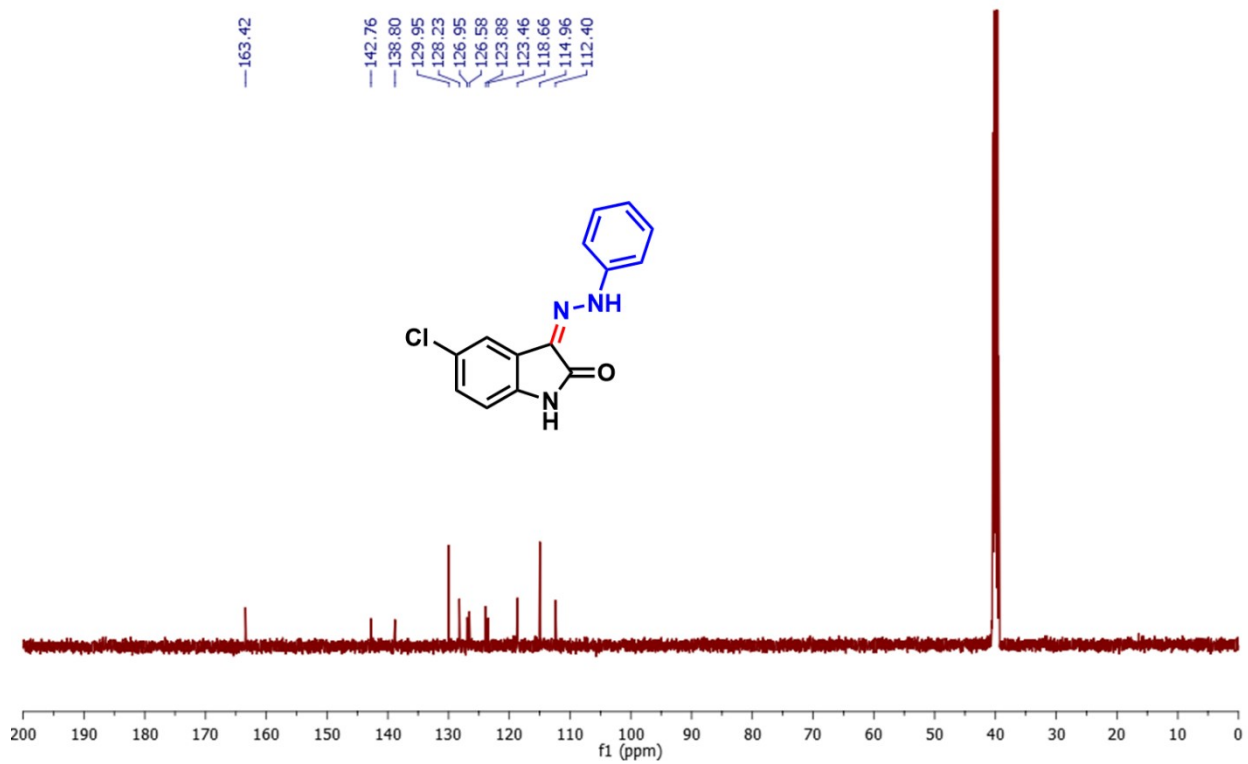

### 5-bromo-3-(2-phenylhydrazineylidene)indolin-2-one (4d)

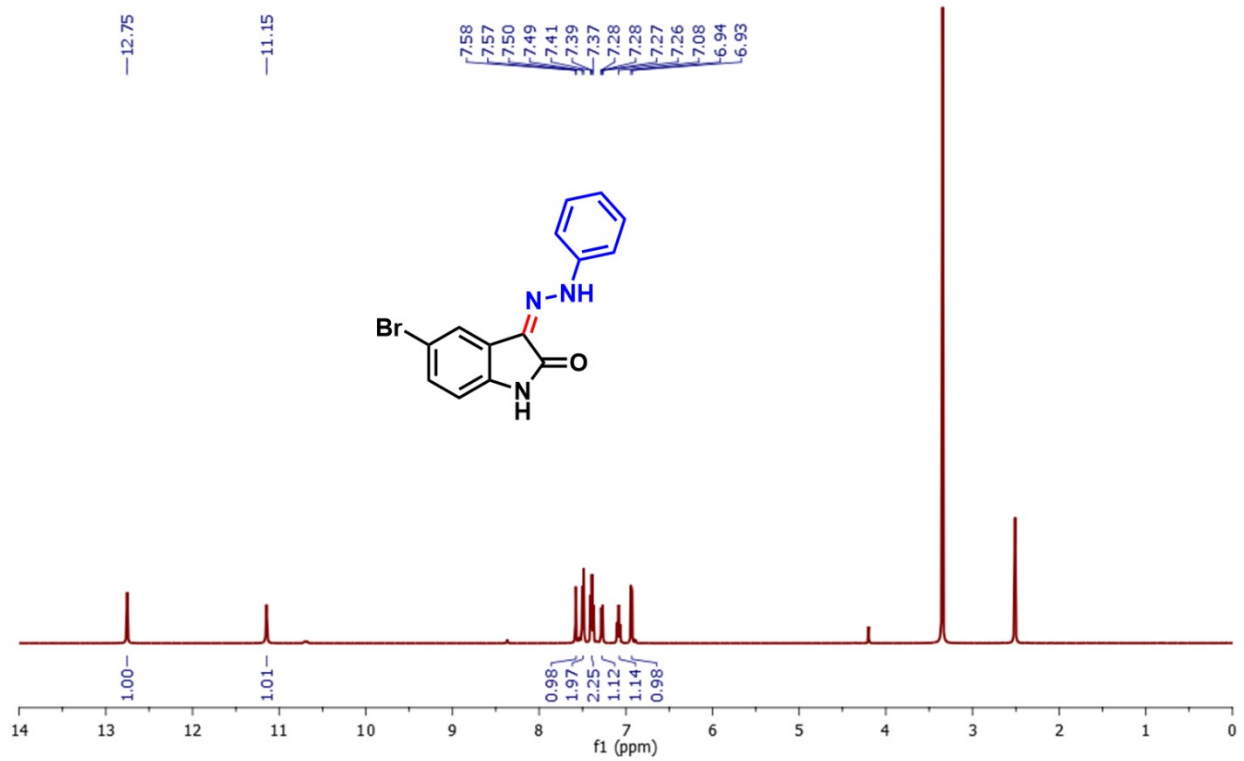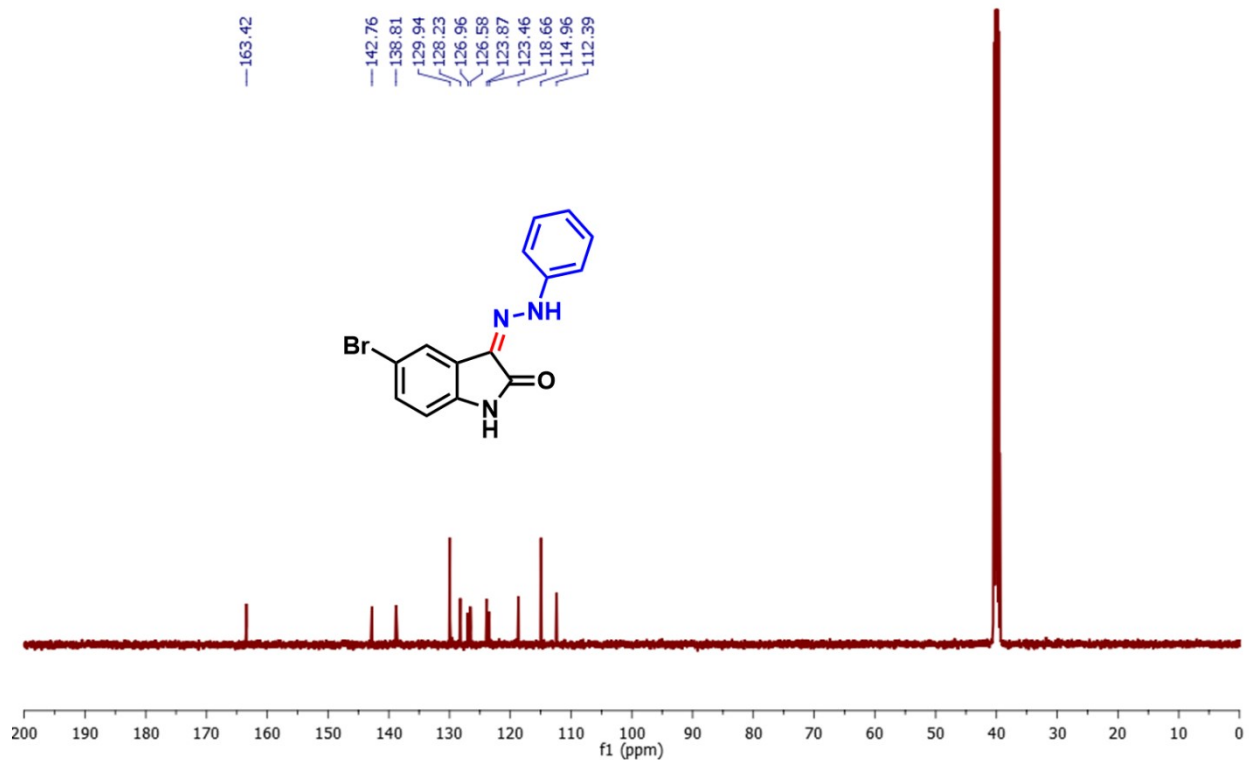

### 5-fluoro-3-(2-phenylhydrazineylidene)indolin-2-one (4e)

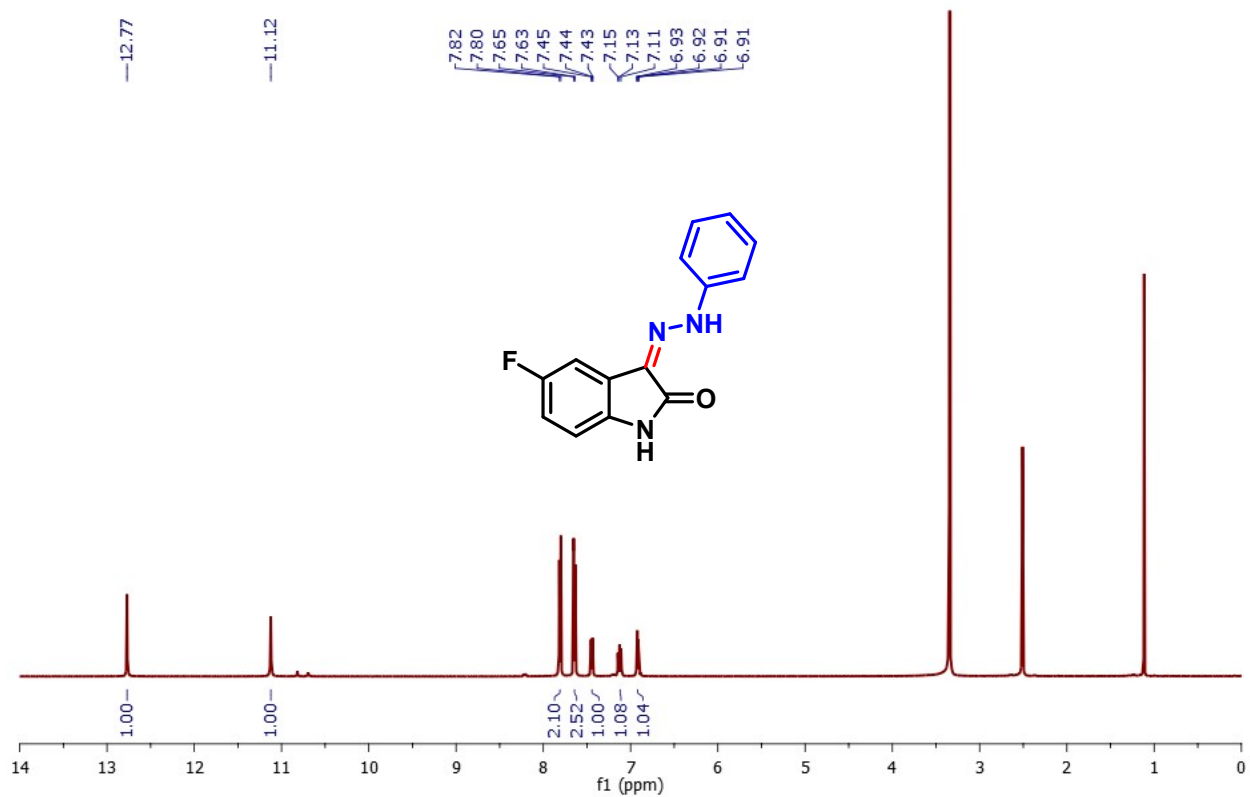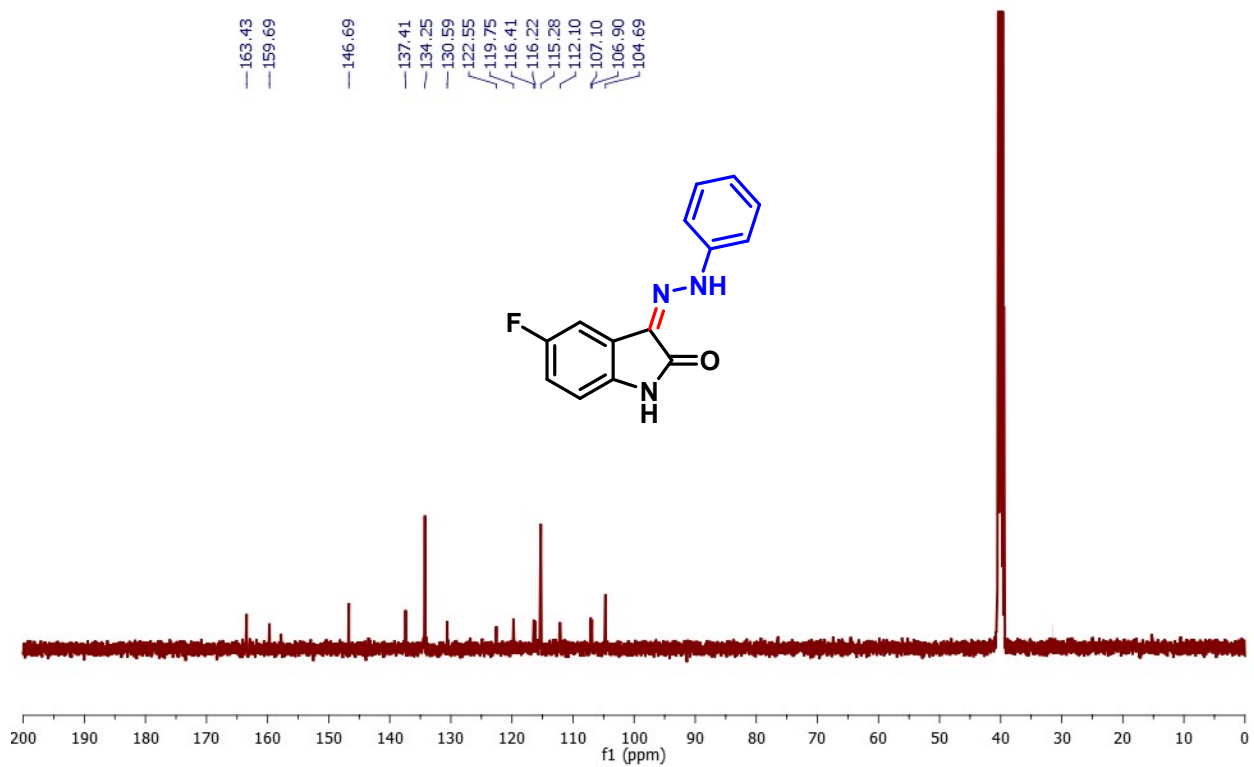

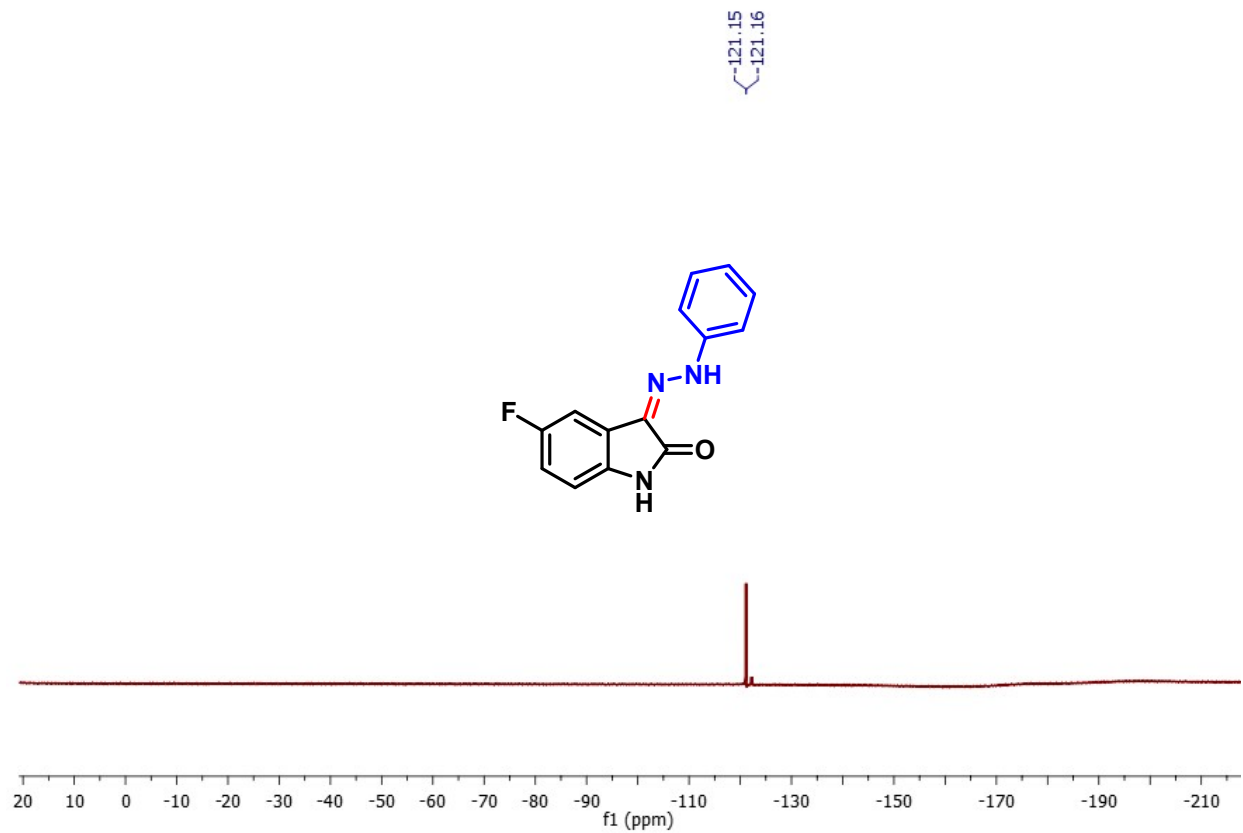

**6-chloro-3-(2-phenylhydrazineylidene)indolin-2-one (4f)**

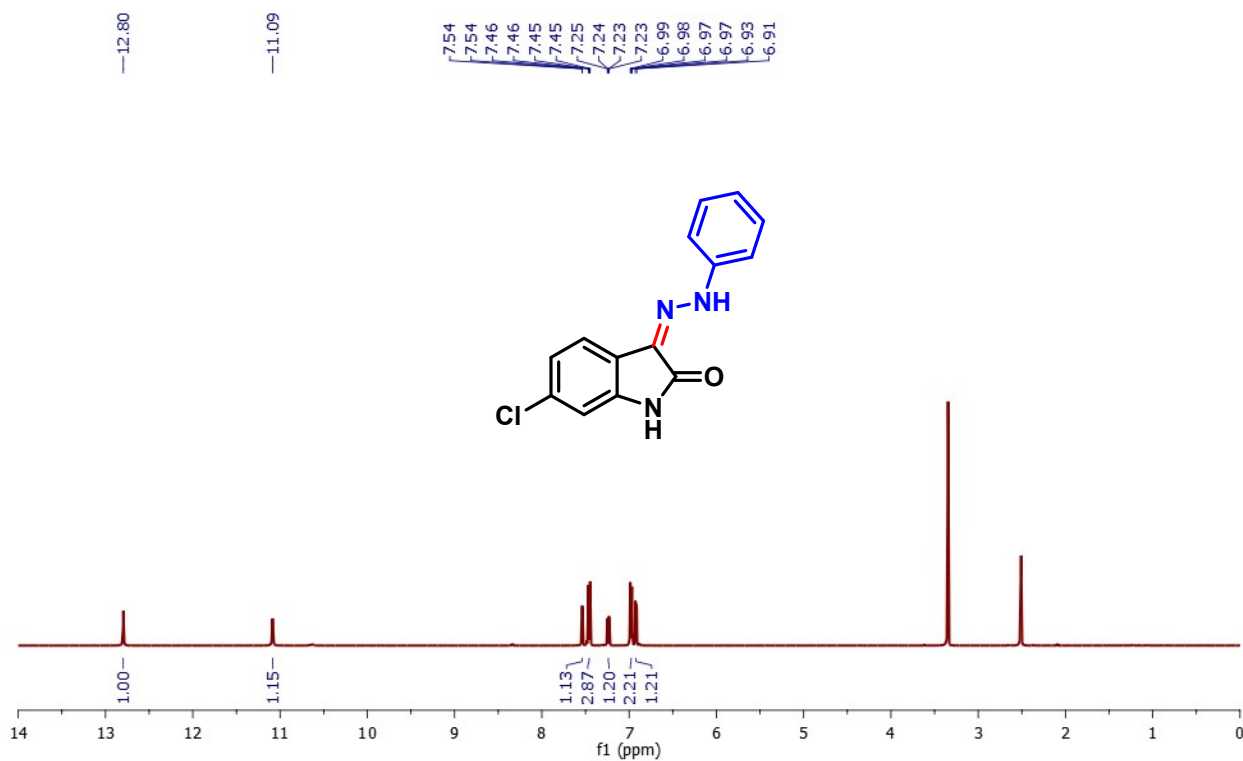



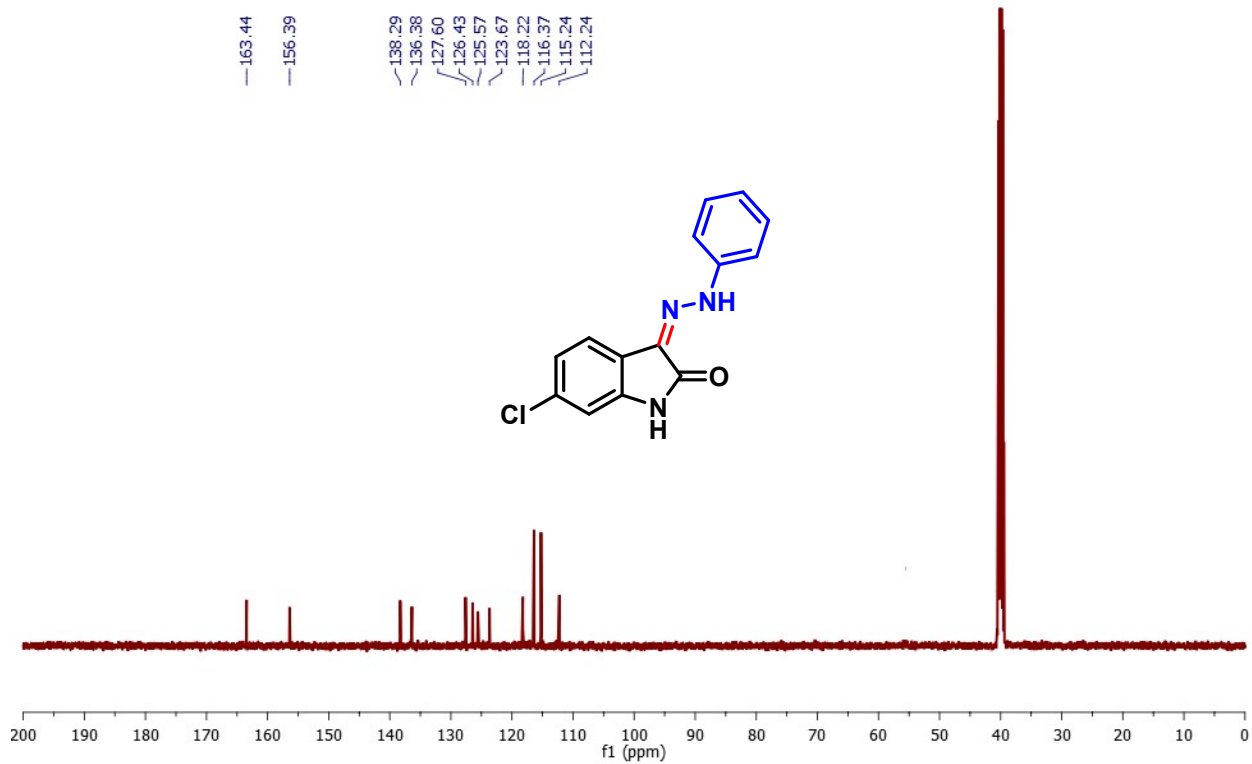

**6-bromo-3-(2-phenylhydrazineylidene)indolin-2-one (4g)**

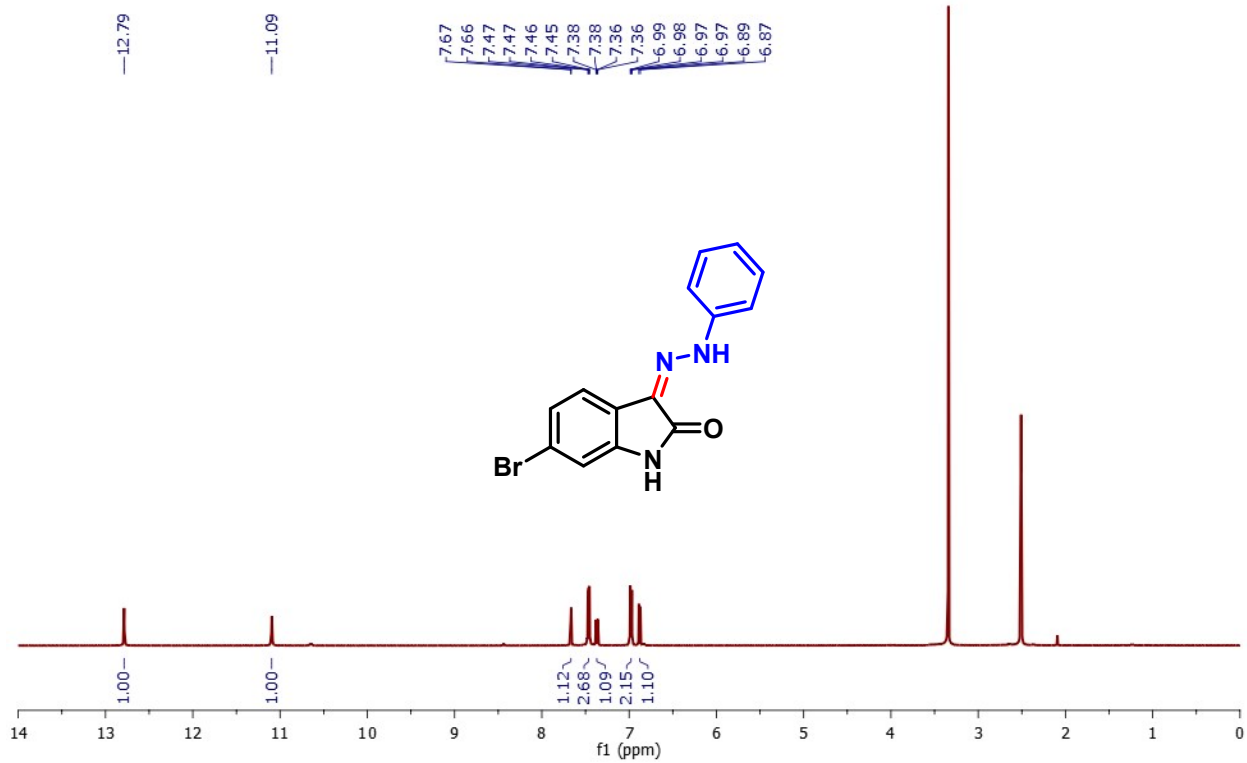

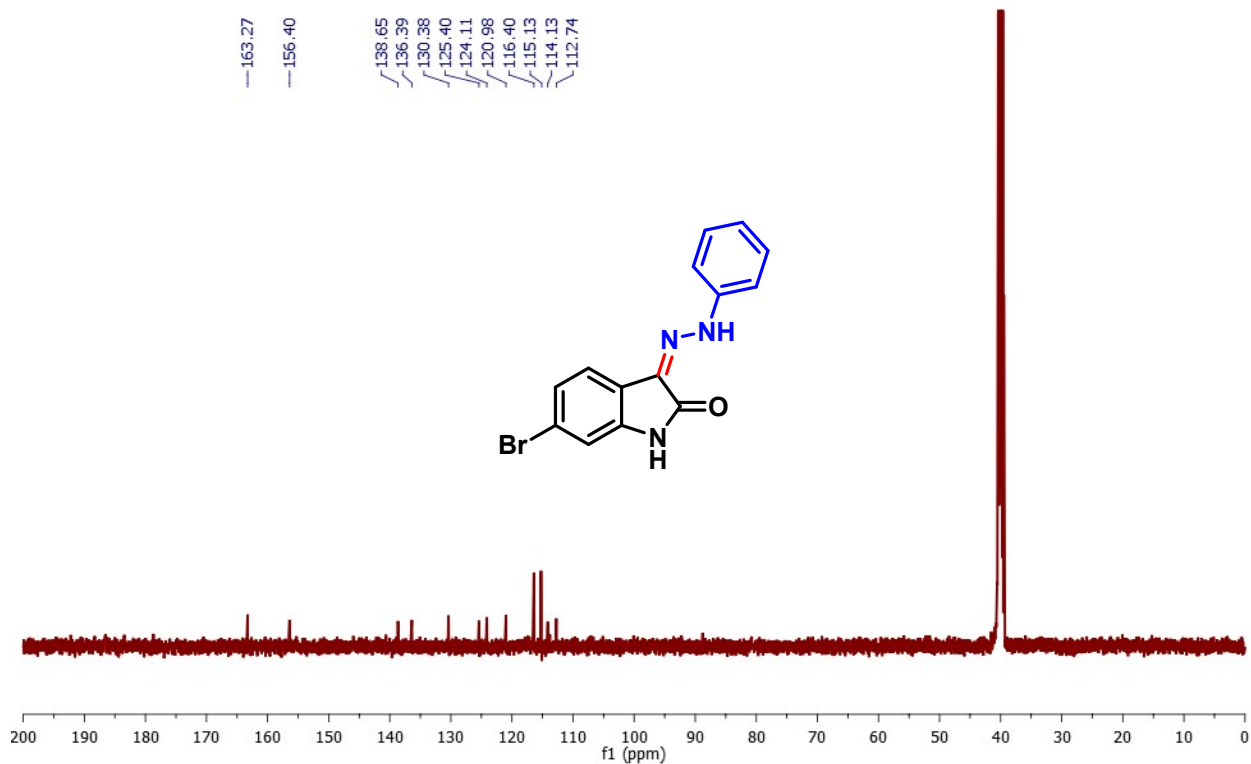

**4-chloro-3-(2-phenylhydrazineylidene)indolin-2-one (4h)**

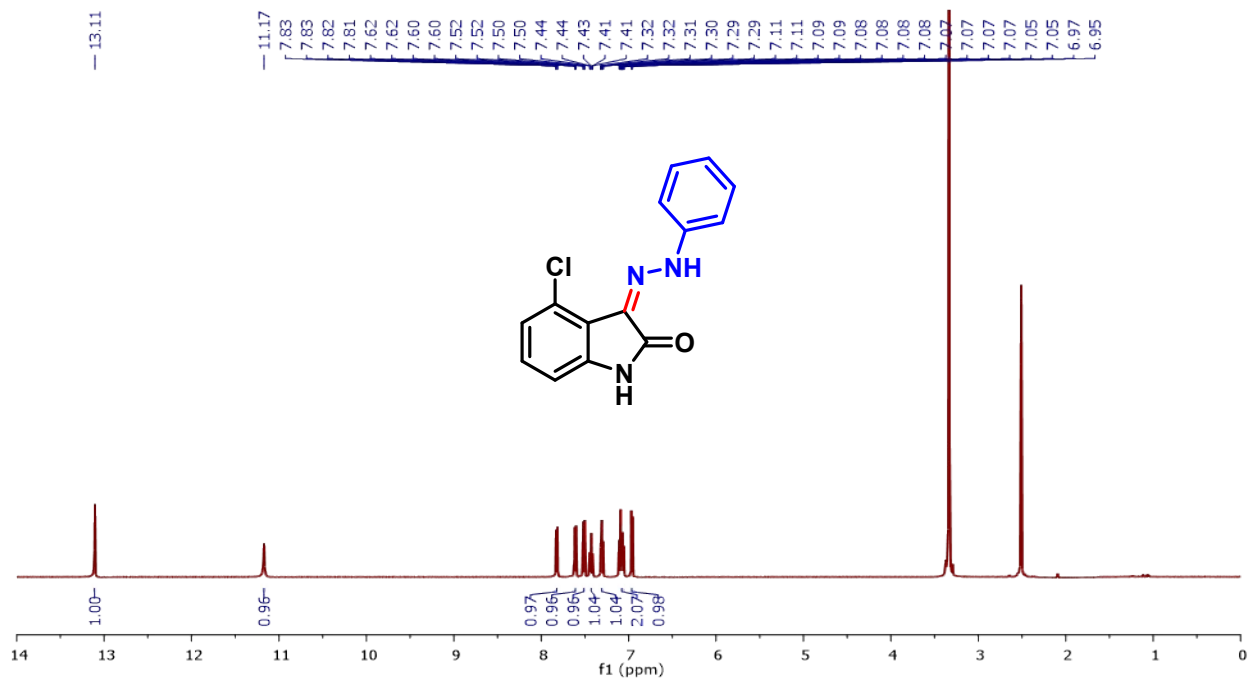

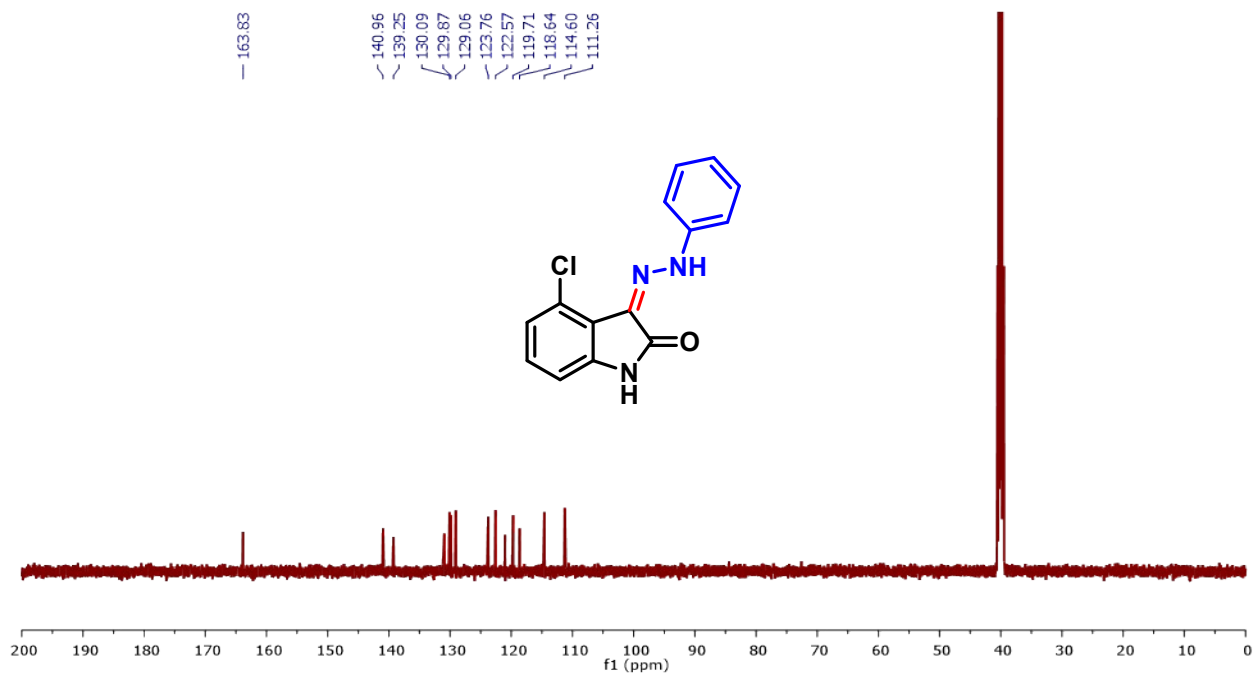

**5,7-dichloro-3-(2-phenylhydrazineylidene)indolin-2-one (4i)**

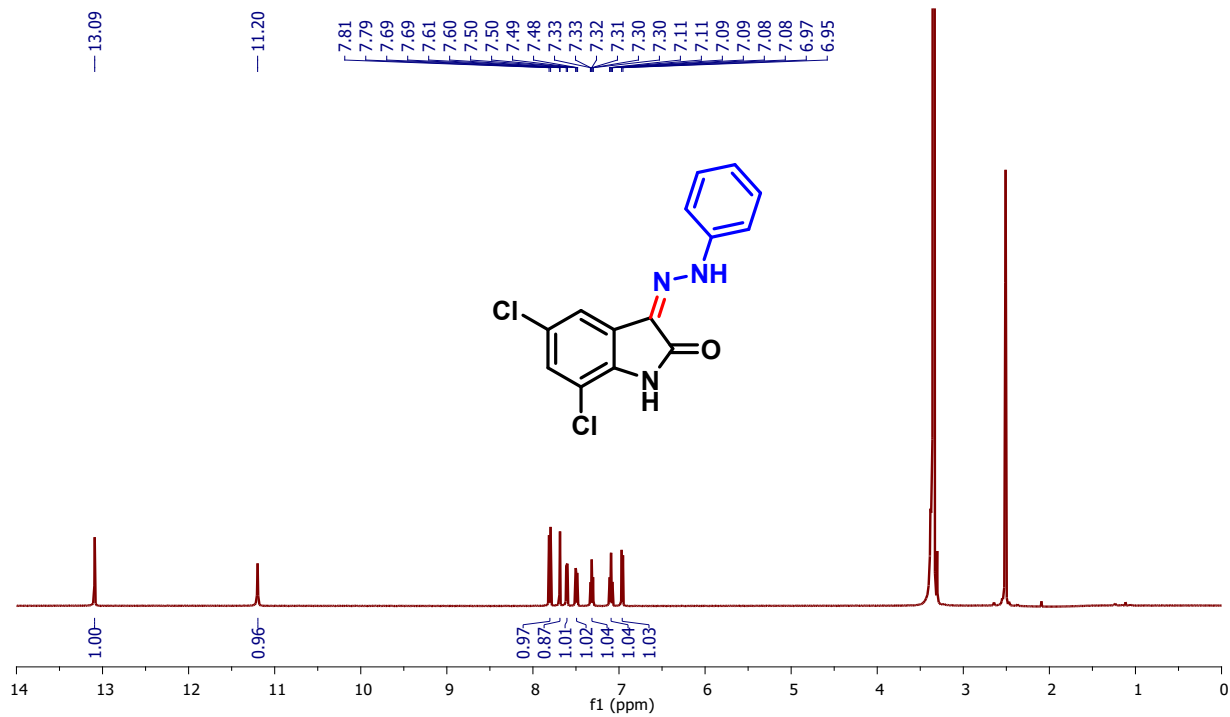

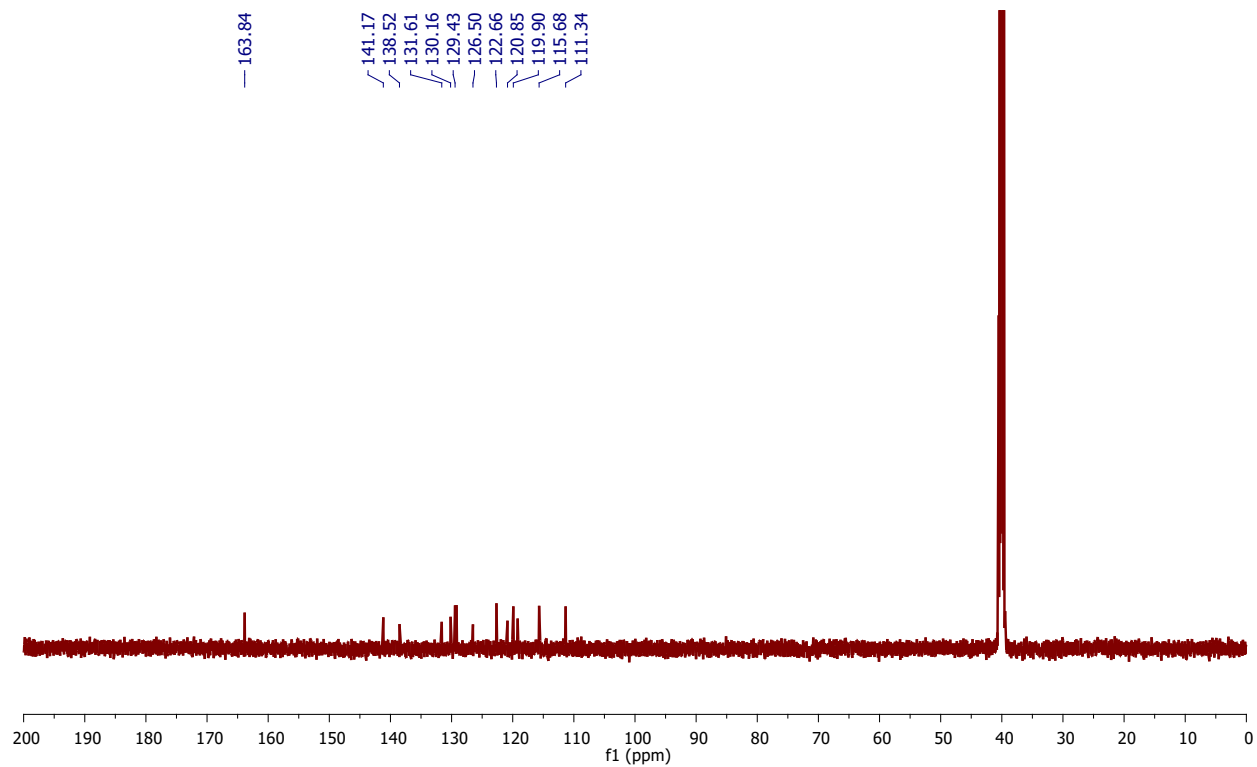

**5-methyl-3-(2-phenylhydrazineylidene)indolin-2-one (4j)**

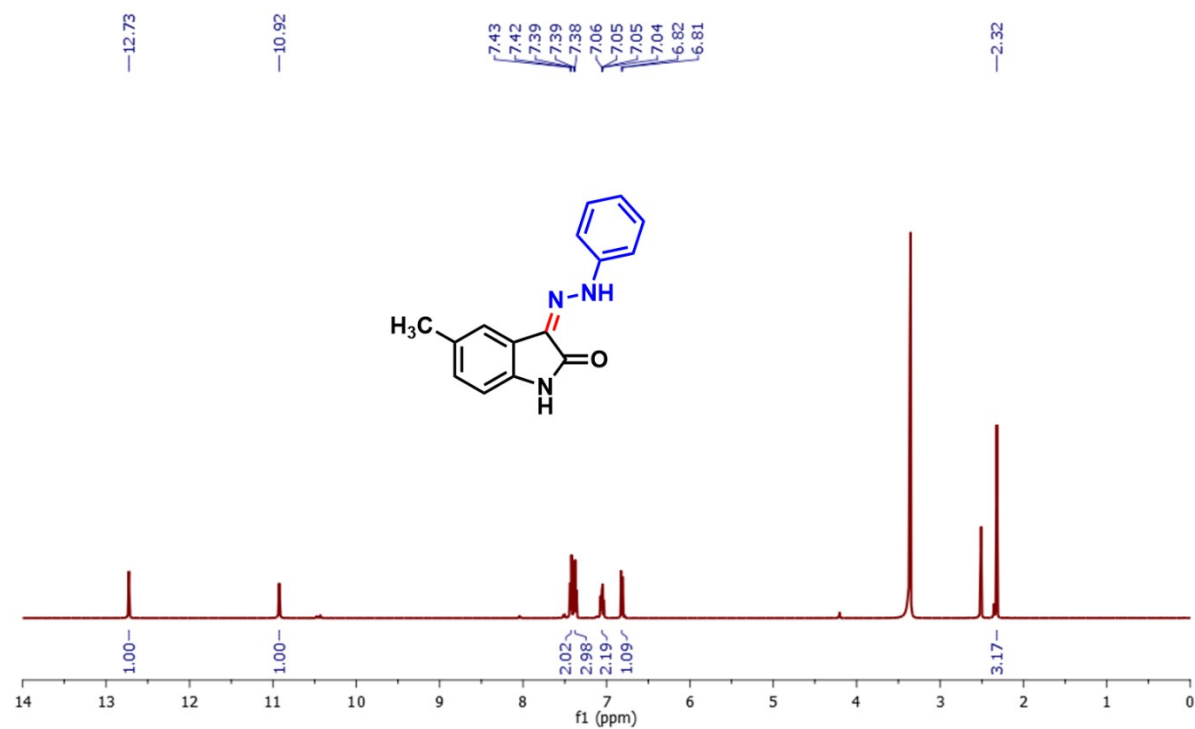

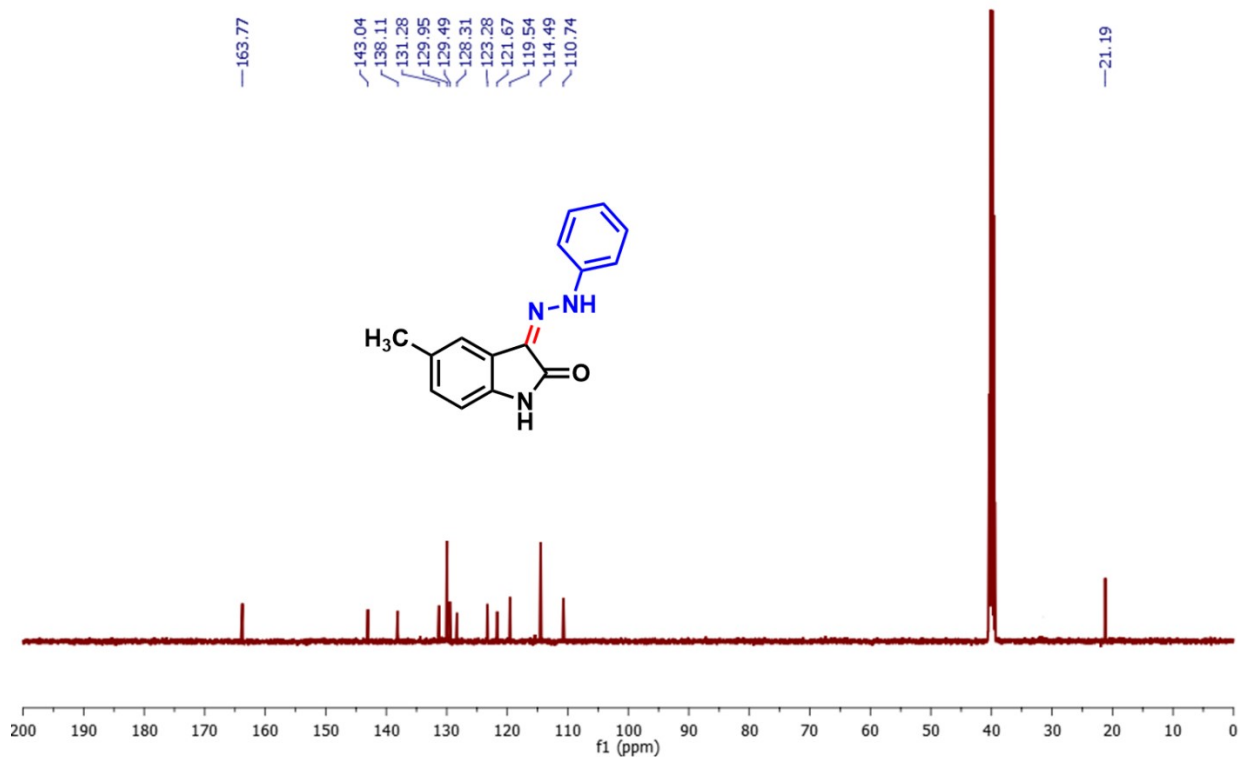

**5-methoxy-3-(2-phenylhydrazineylidene)indolin-2-one (4k)**

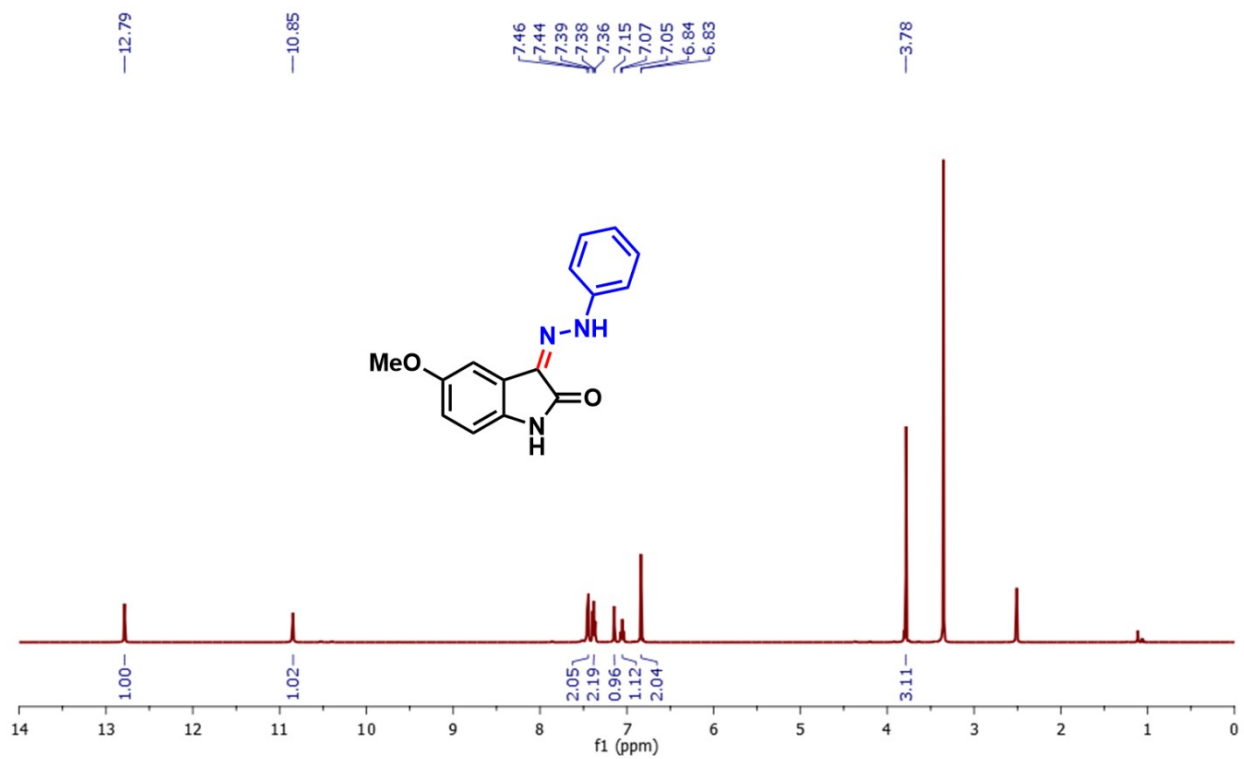

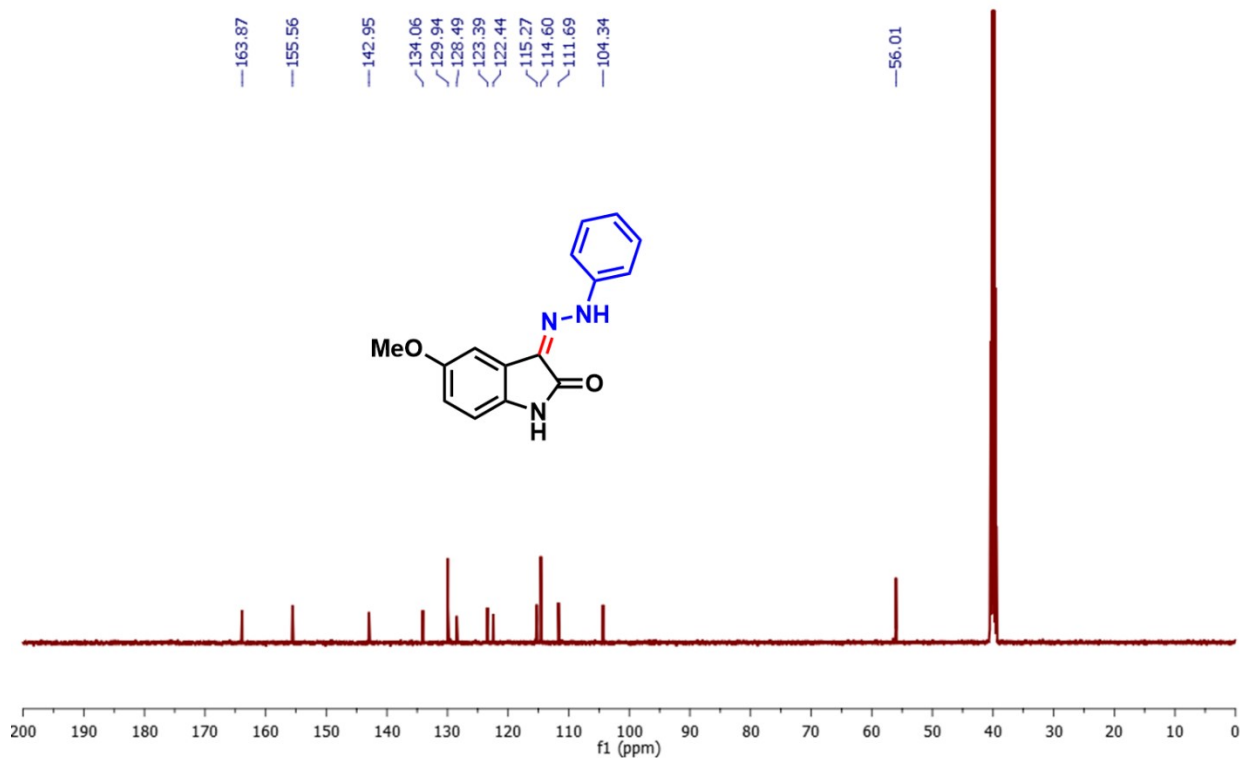

**5,7-dimethyl-3-(2-phenylhydrazineylidene)indolin-2-one (4l)**

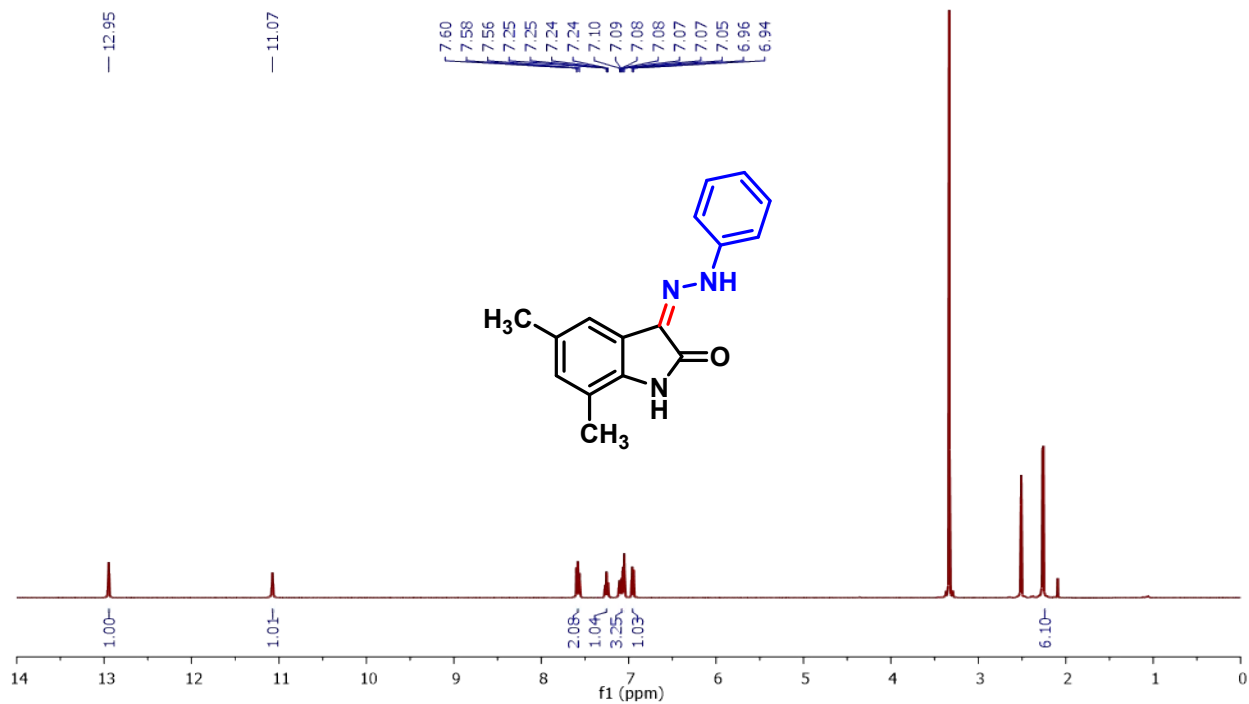

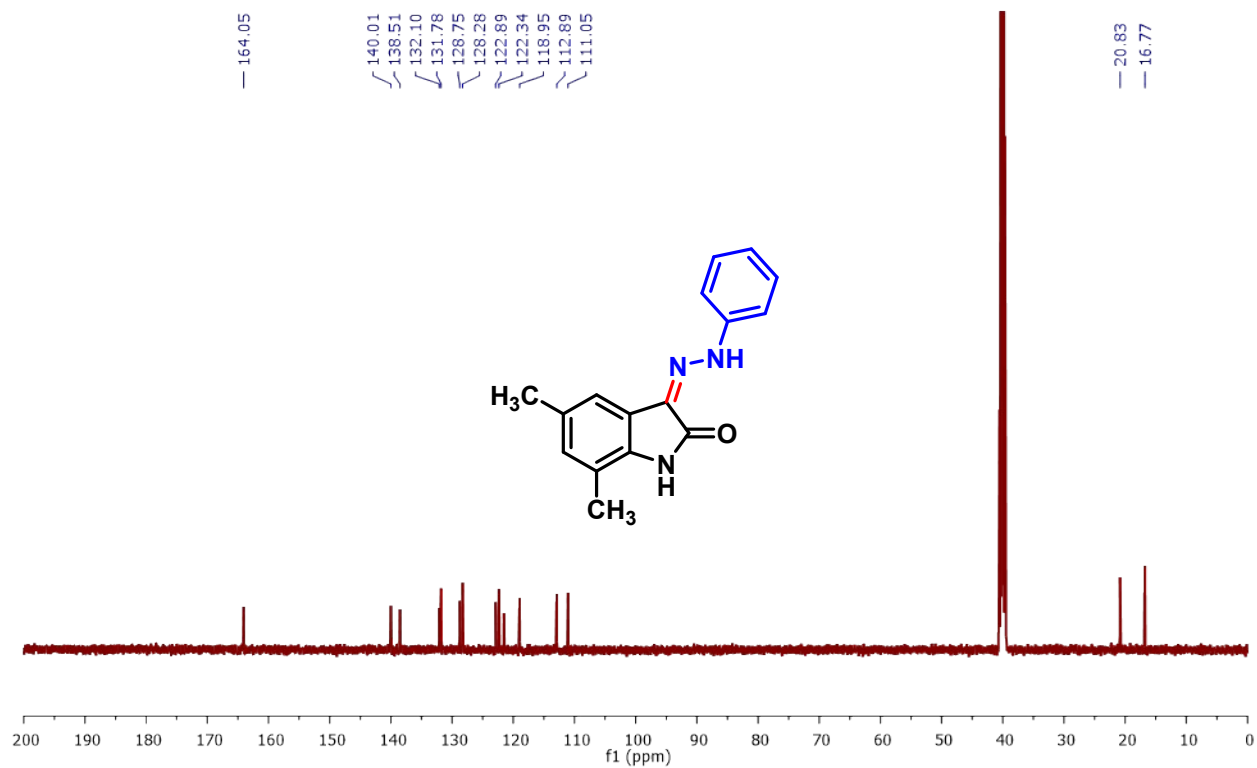

### Ethyl-2-oxo-3-(2-phenylhydrazineylidene)indoline-1-carboxylate (4m)

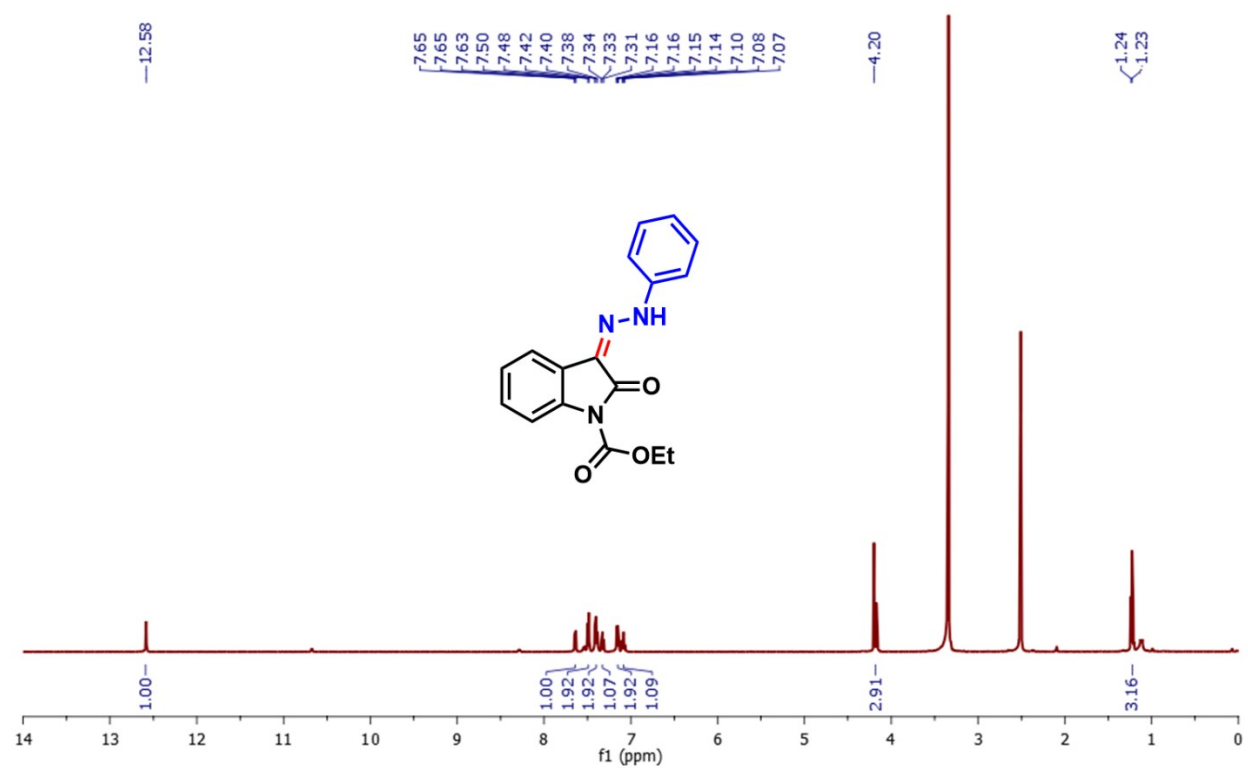

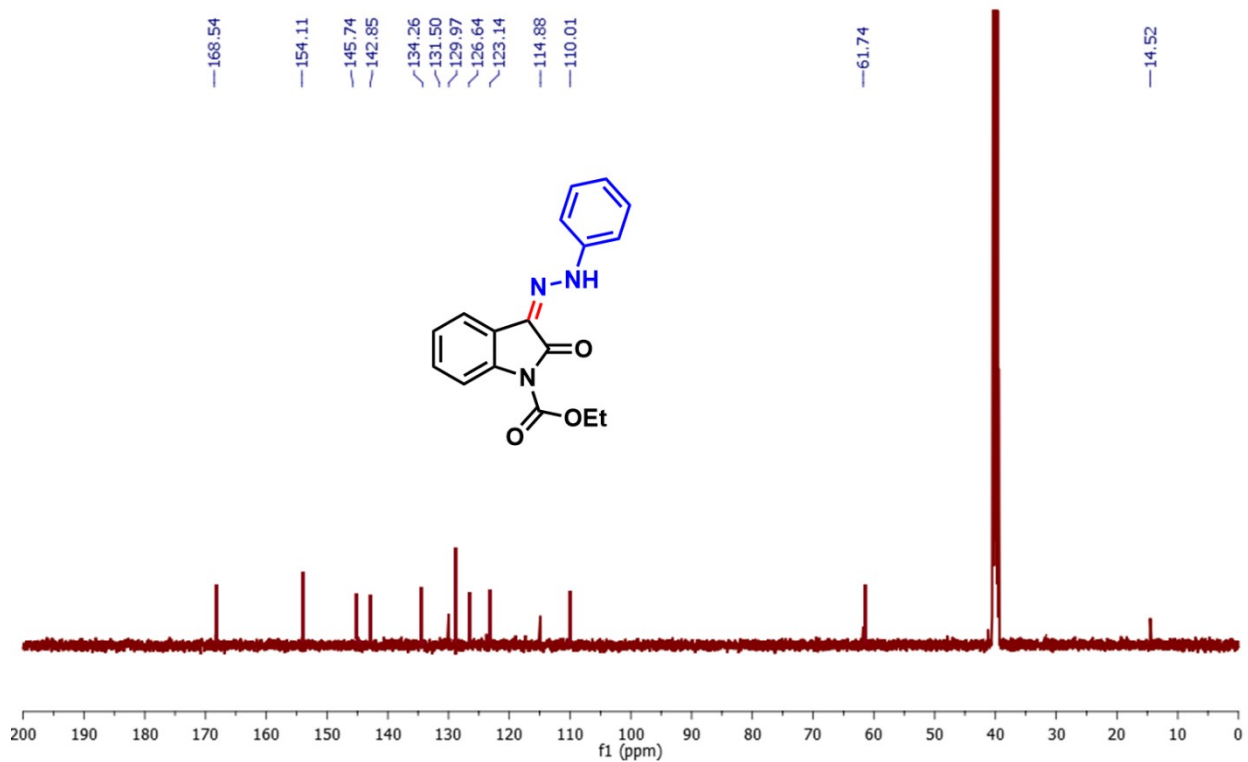

**1-benzyl-3-(2-phenylhydrazineylidene)indolin-2-one (4n)**

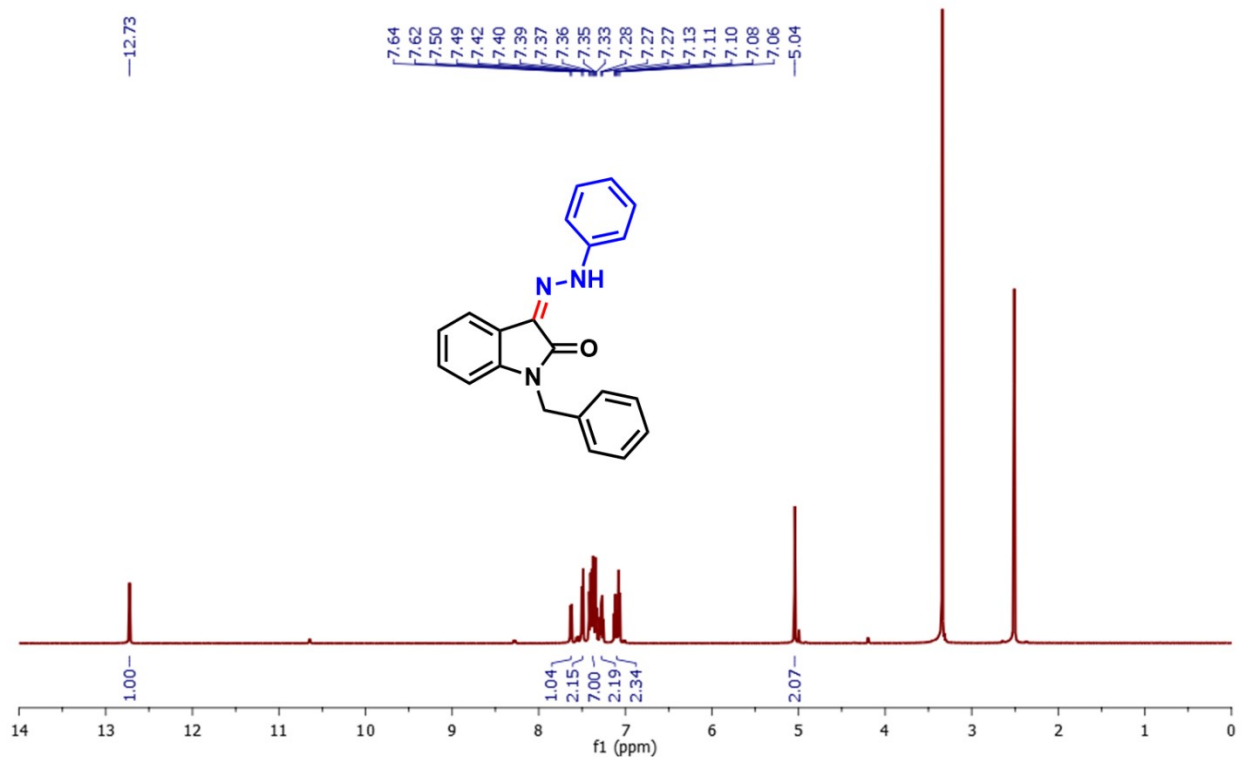



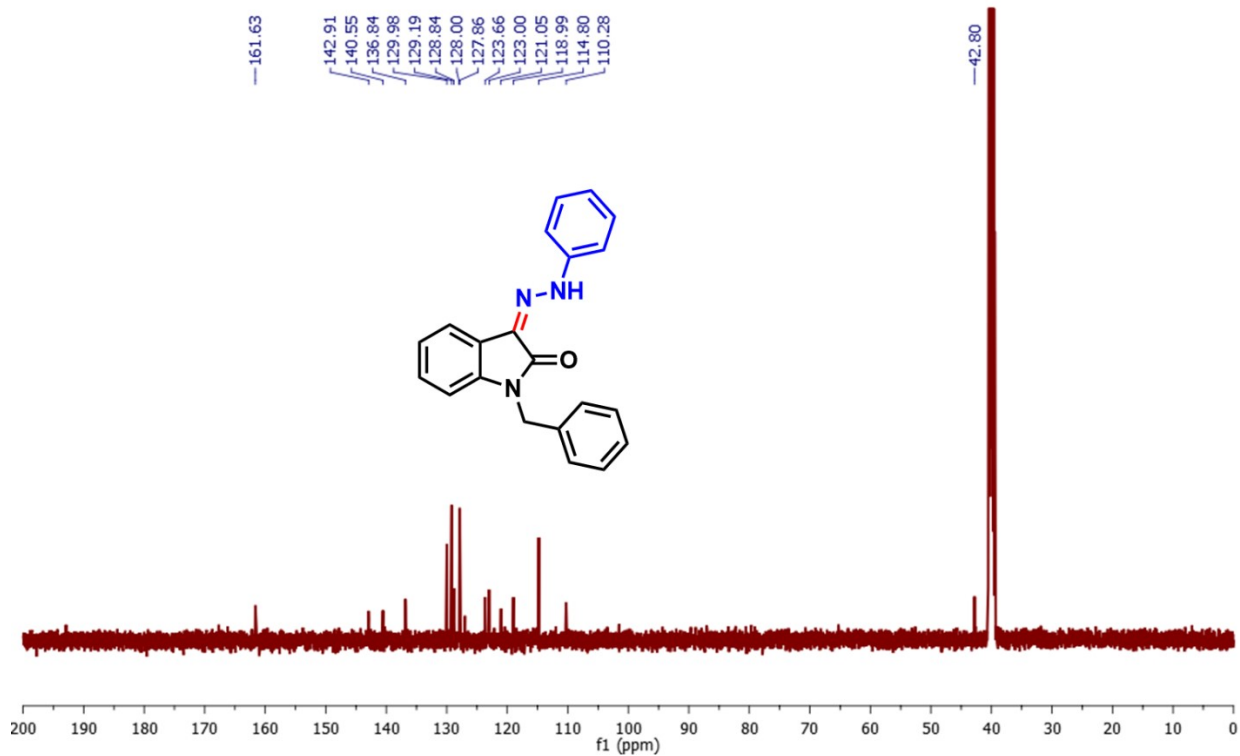

**5-chloro-1-ethyl-3-(2-phenylhydrazineylidene)indolin-2-one(4o)**

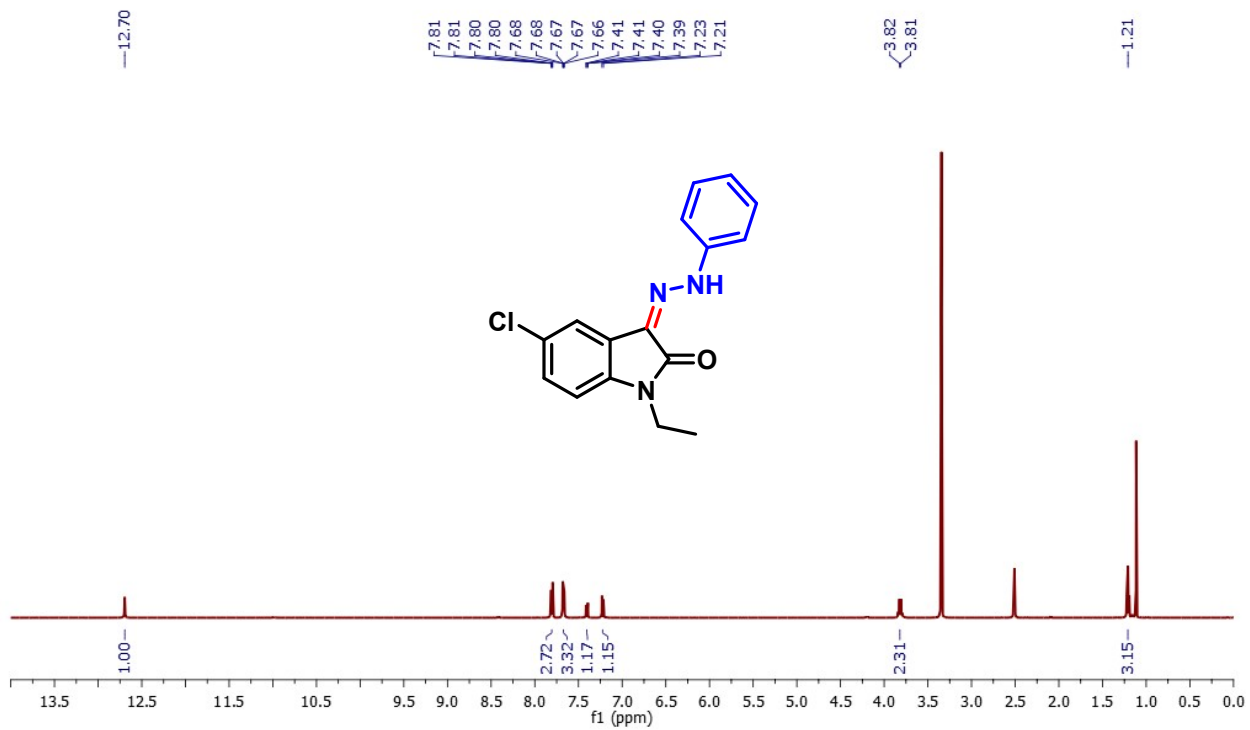

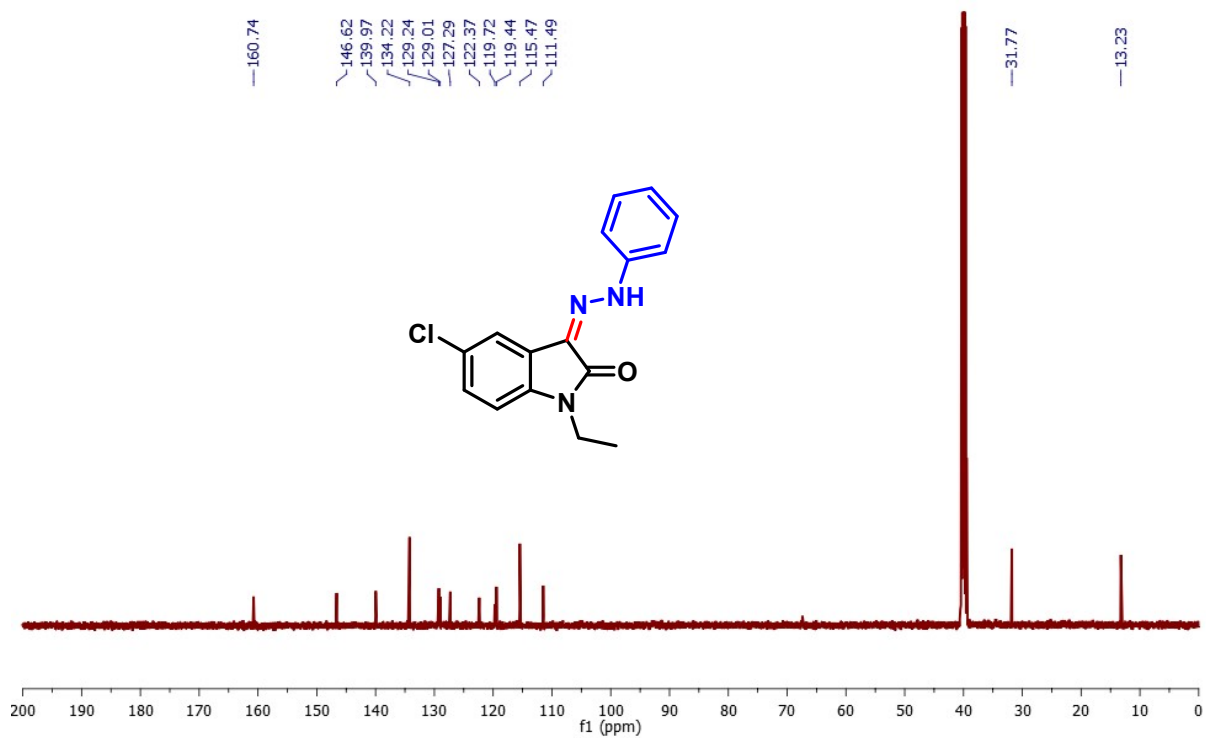

**4-(2-(2-oxindolin-3-ylidene)hydrazineyl)benzonitrile (5a)**

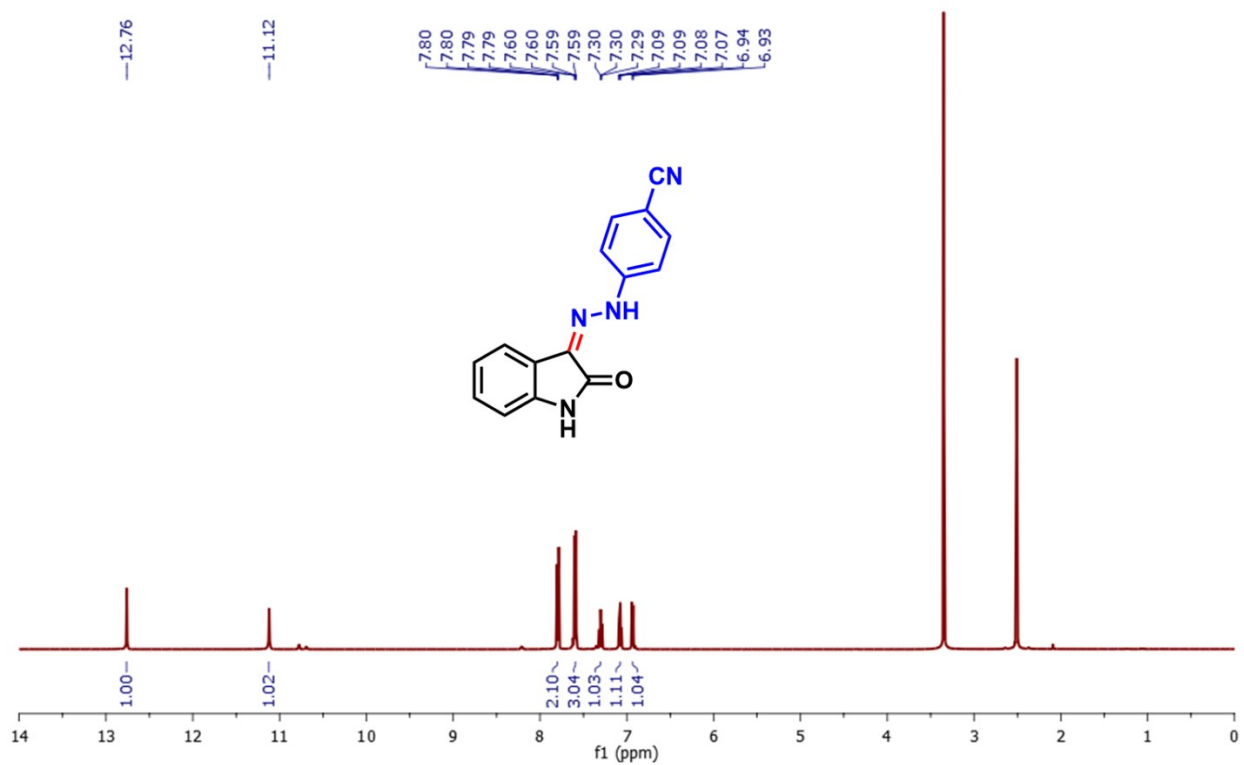

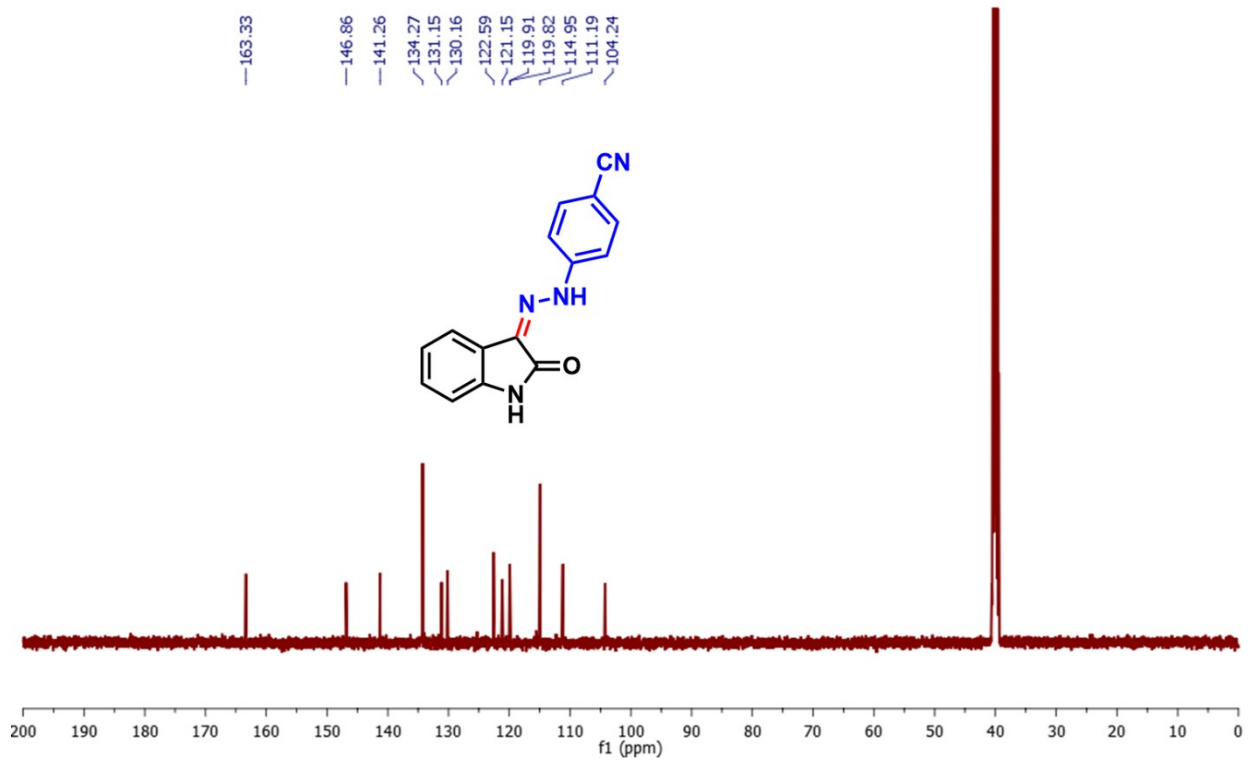

**3-(2-(4-nitrophenyl)hydrazineylidene)indolin-2-one (5b)**

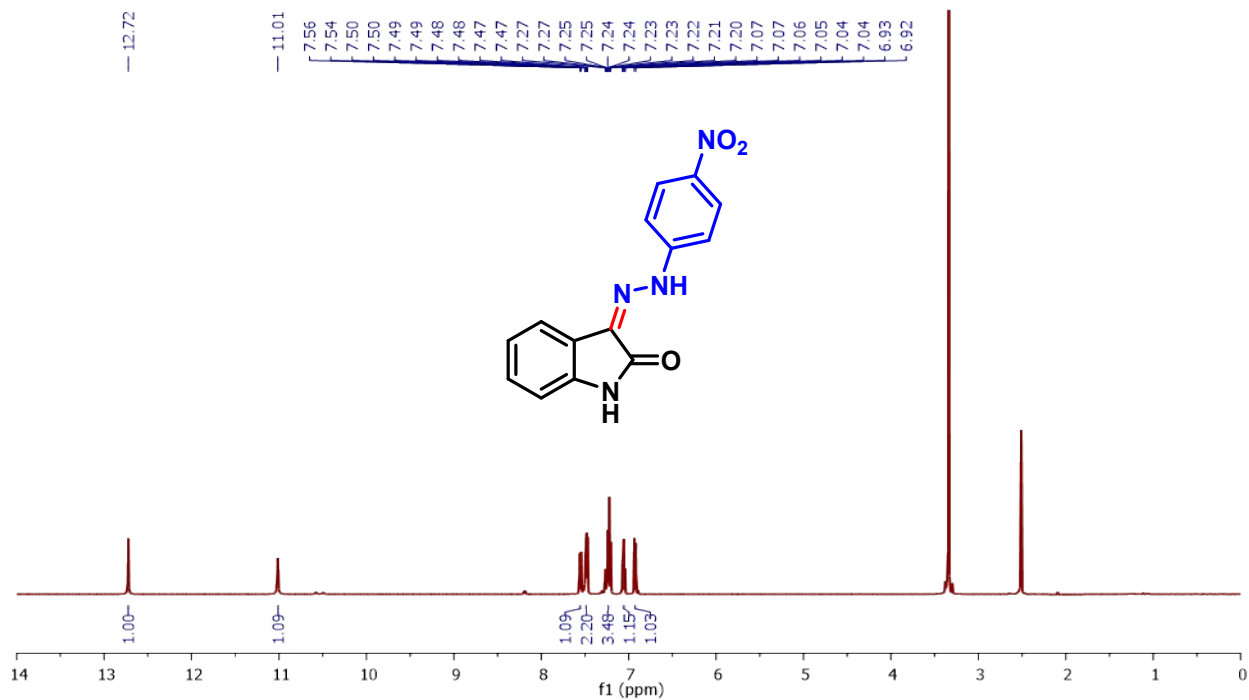

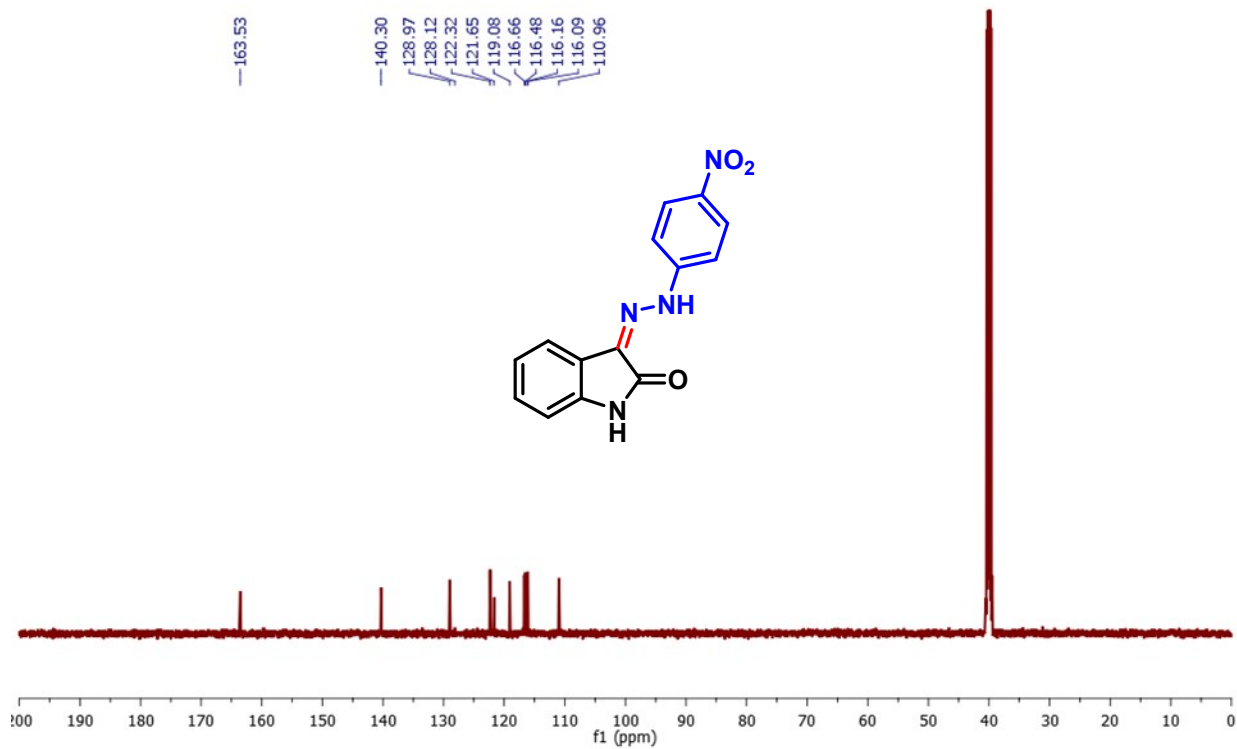

**3-(2-(4-chlorophenyl)hydrazineylidene)indolin-2-one (5c)**

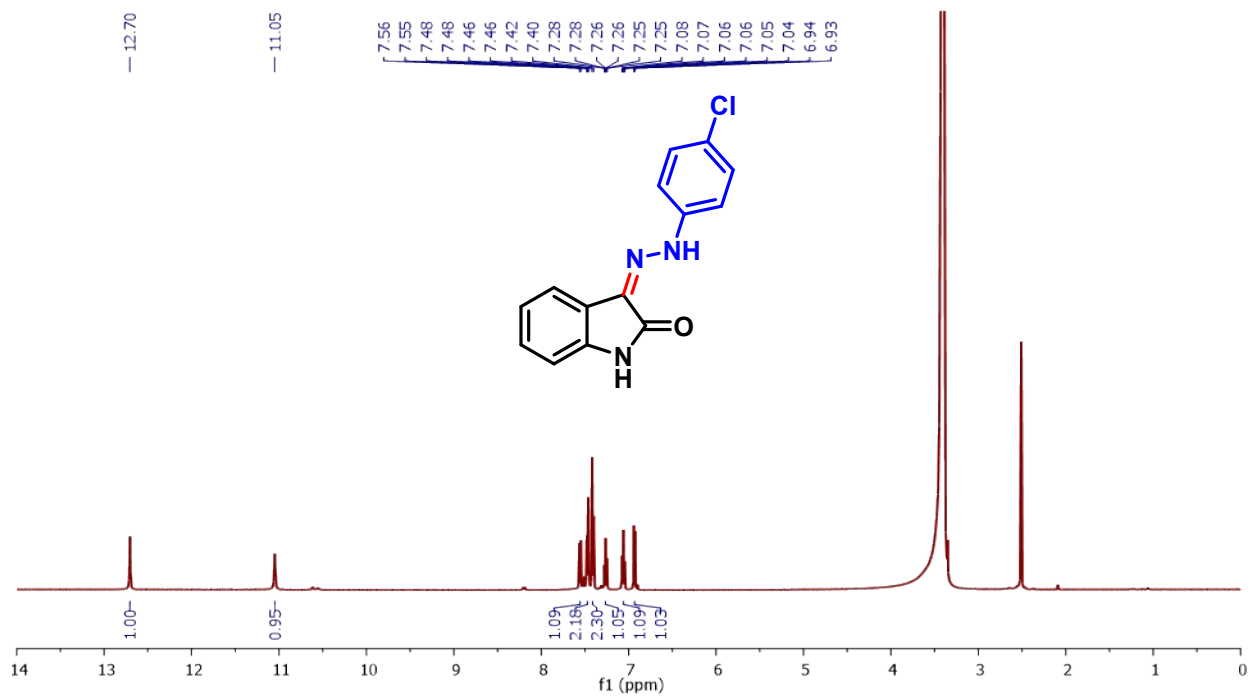

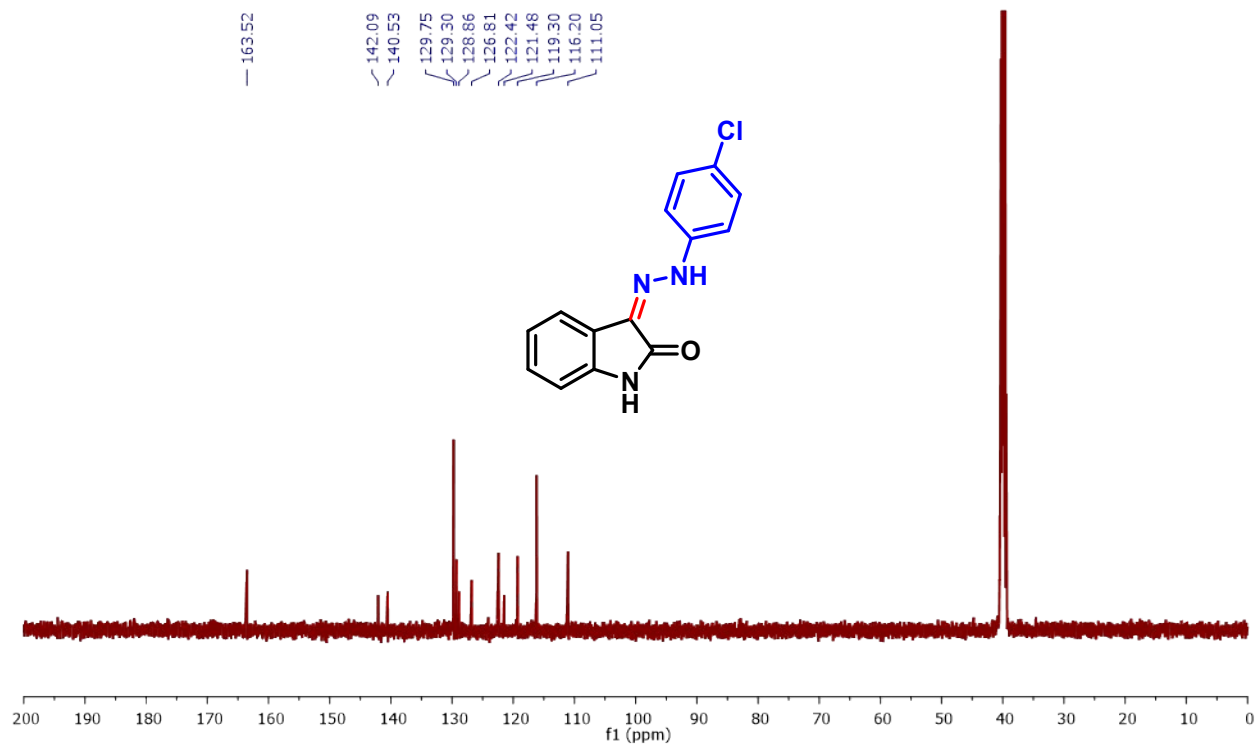

**3-(2-(4-bromophenyl)hydrazineylidene)indolin-2-one (5d)**

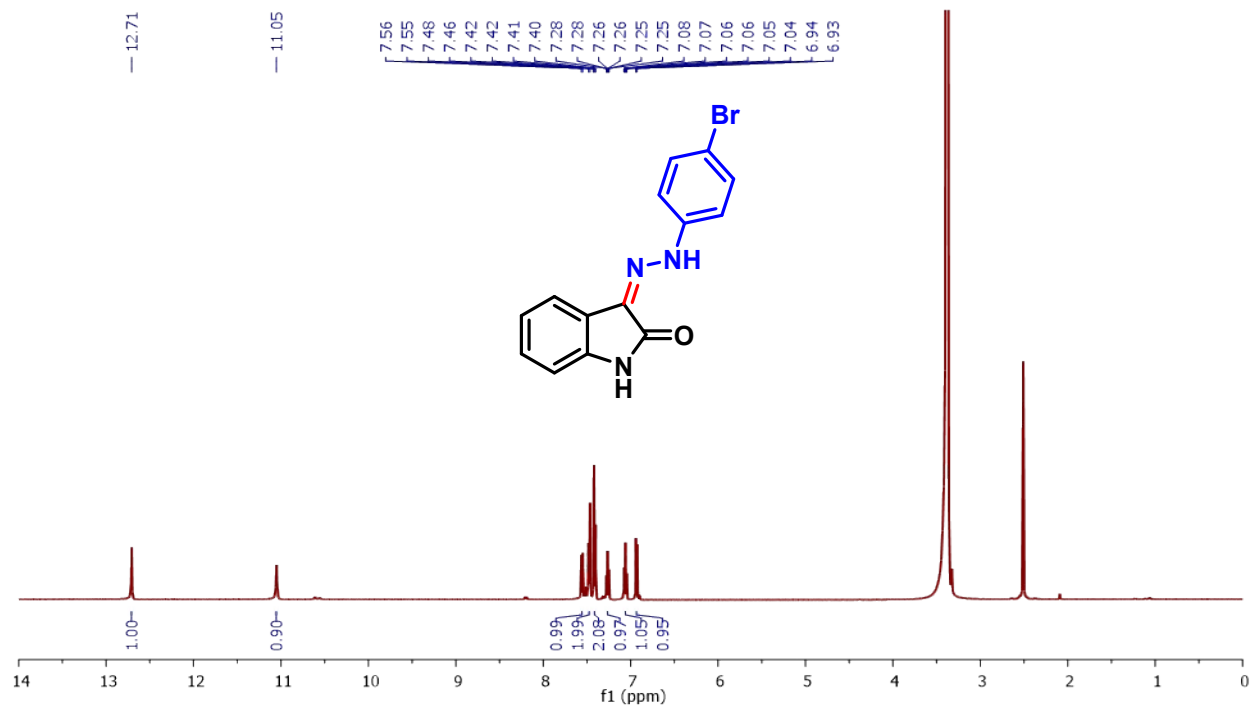

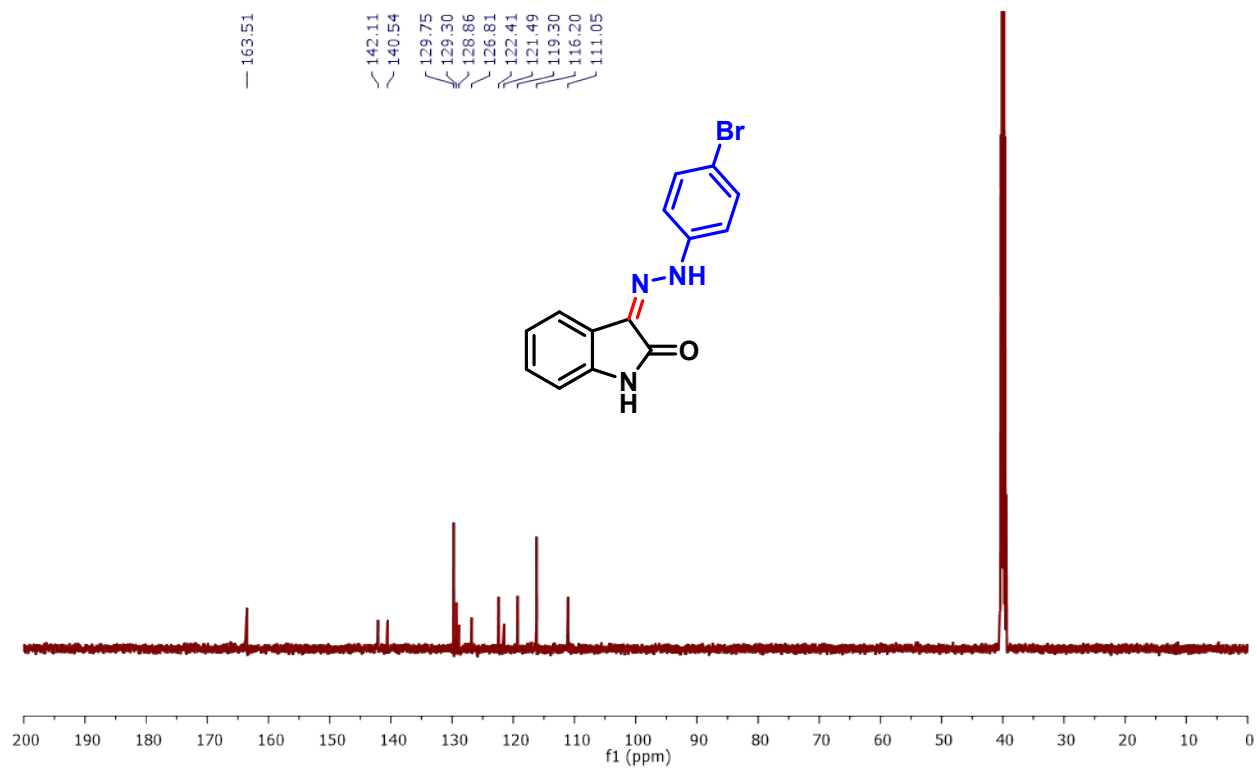

**3-(2-(4-fluorophenyl)hydrazineylidene)indolin-2-one (5e)**

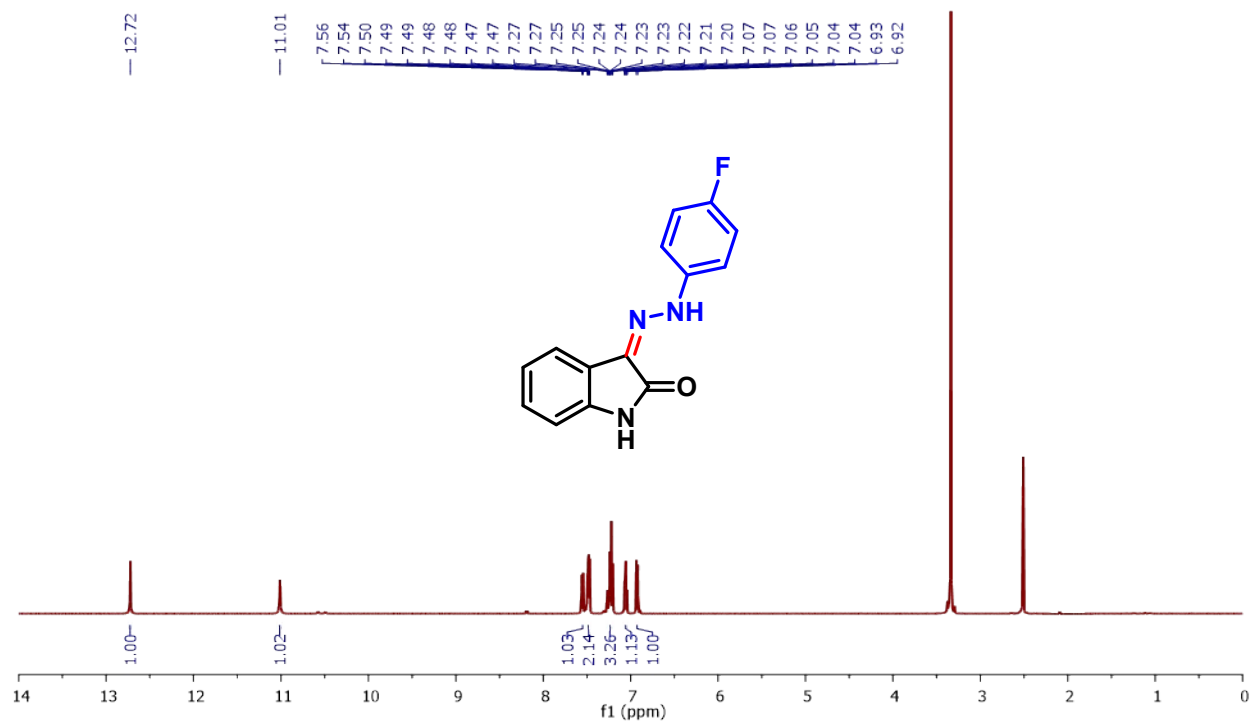

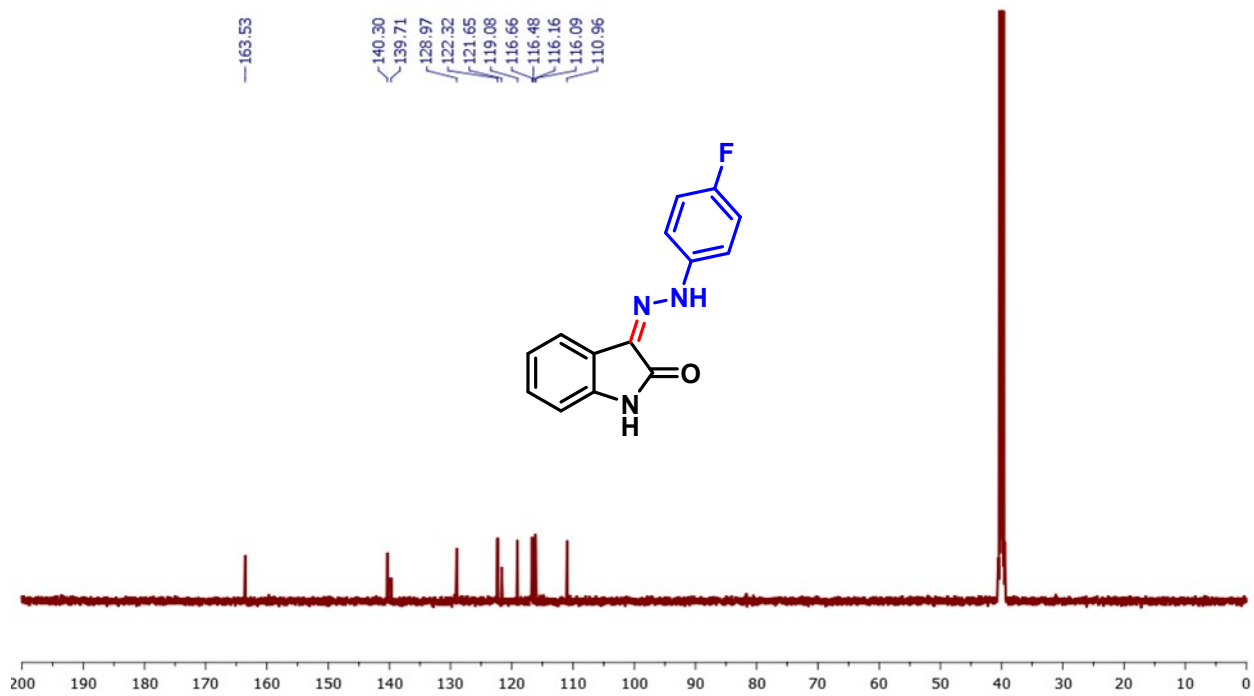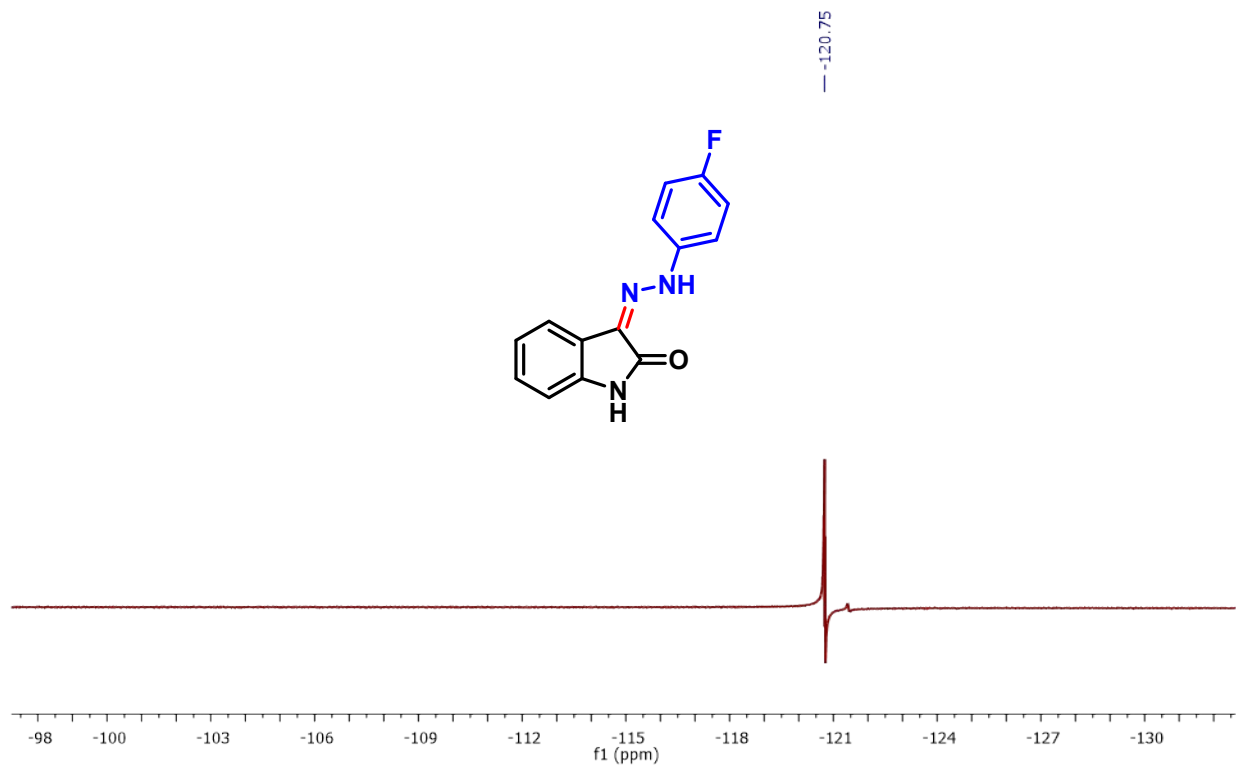

### 3-(2-(2-chlorophenyl)hydrazineylidene)indolin-2-one (5f)

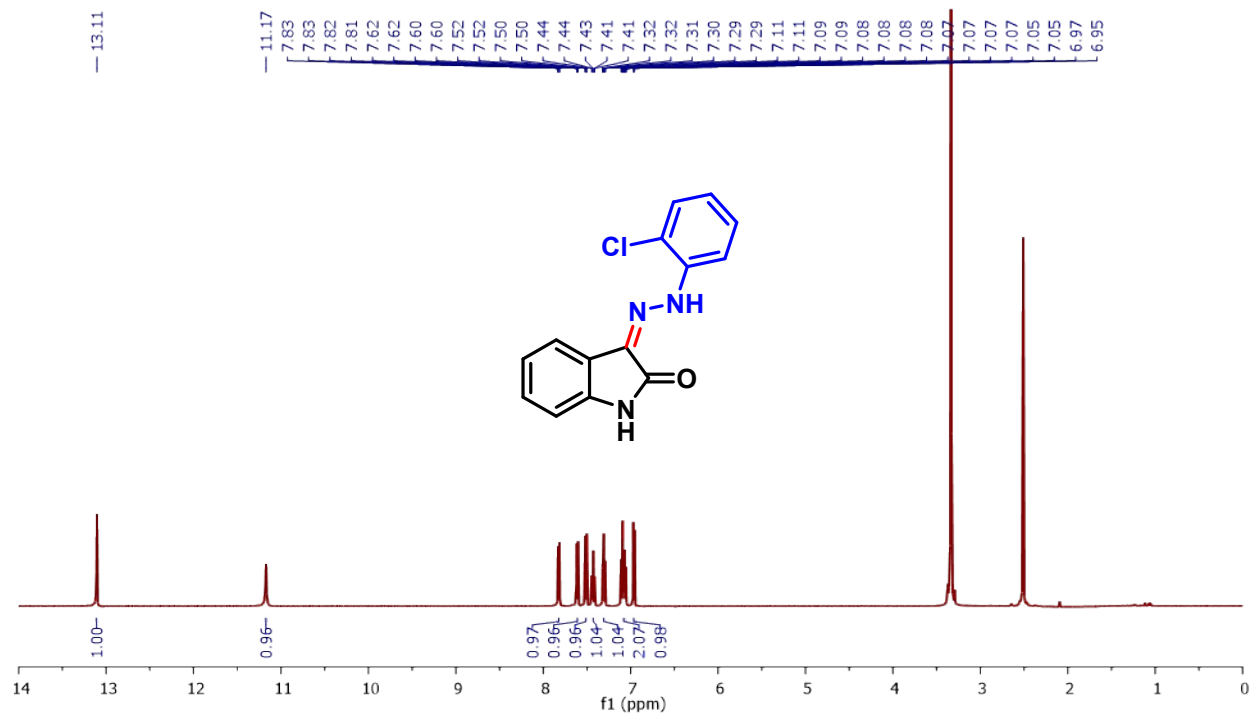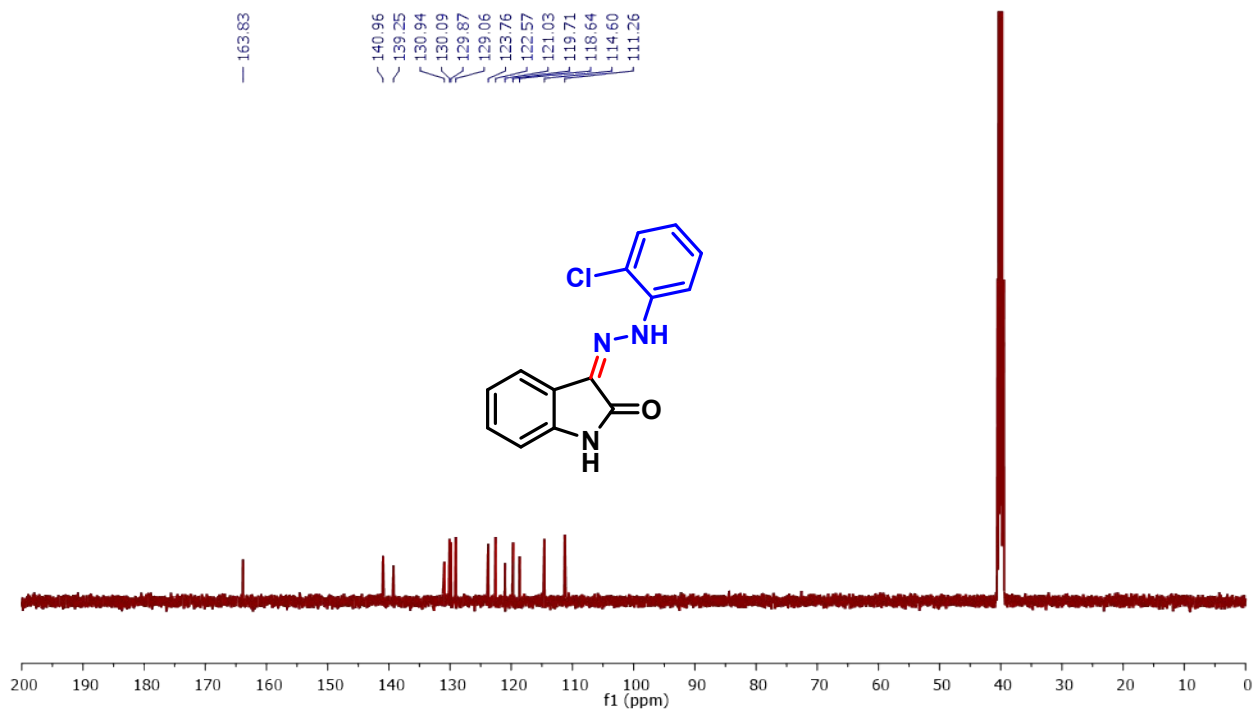



### 3-(2-(2-bromophenyl)hydrazineylidene)indolin-2-one (5g)

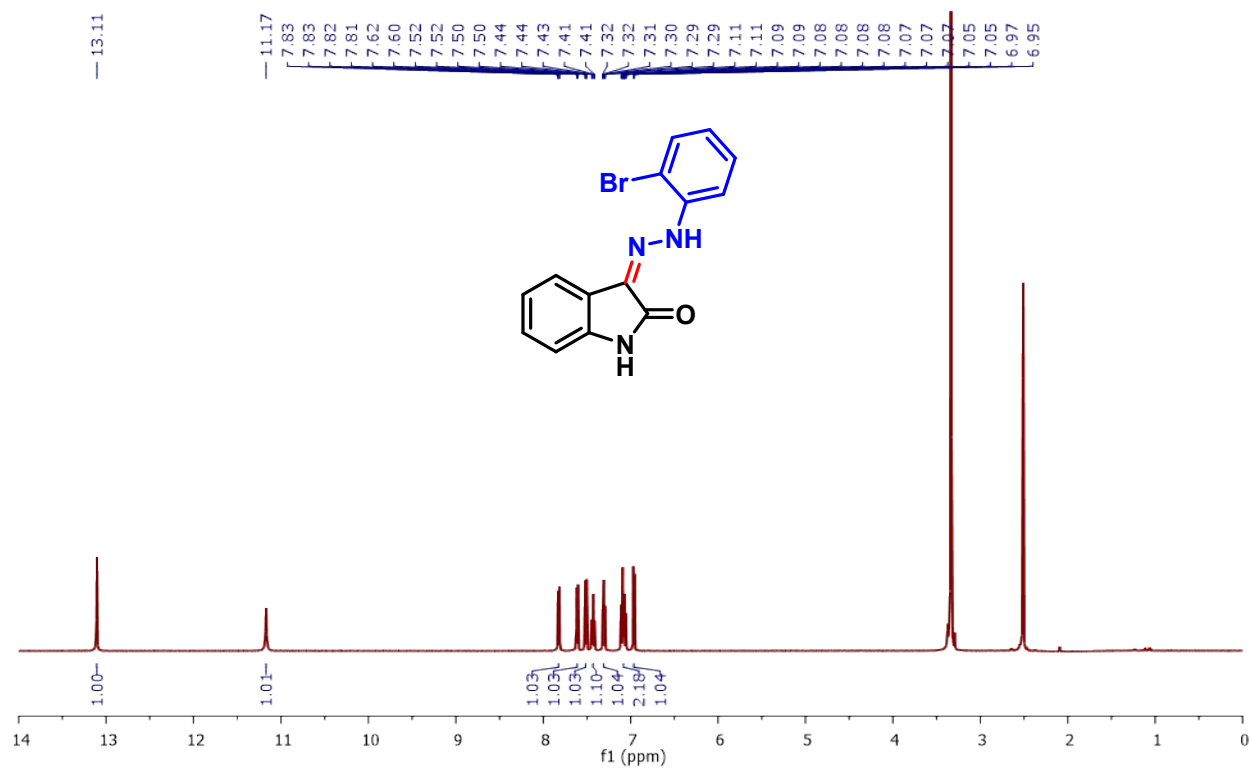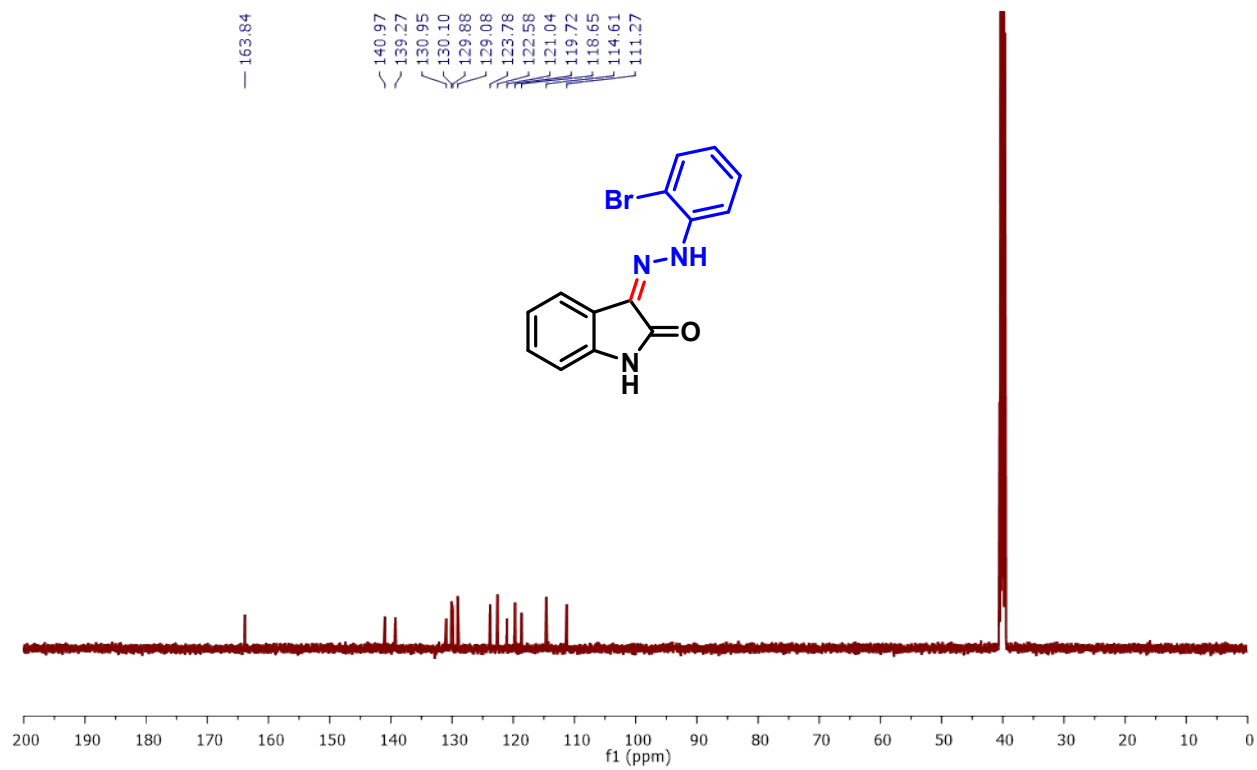

### 3-(2-(2,4-dichlorophenyl)hydrazineylidene)indolin-2-one (5h)

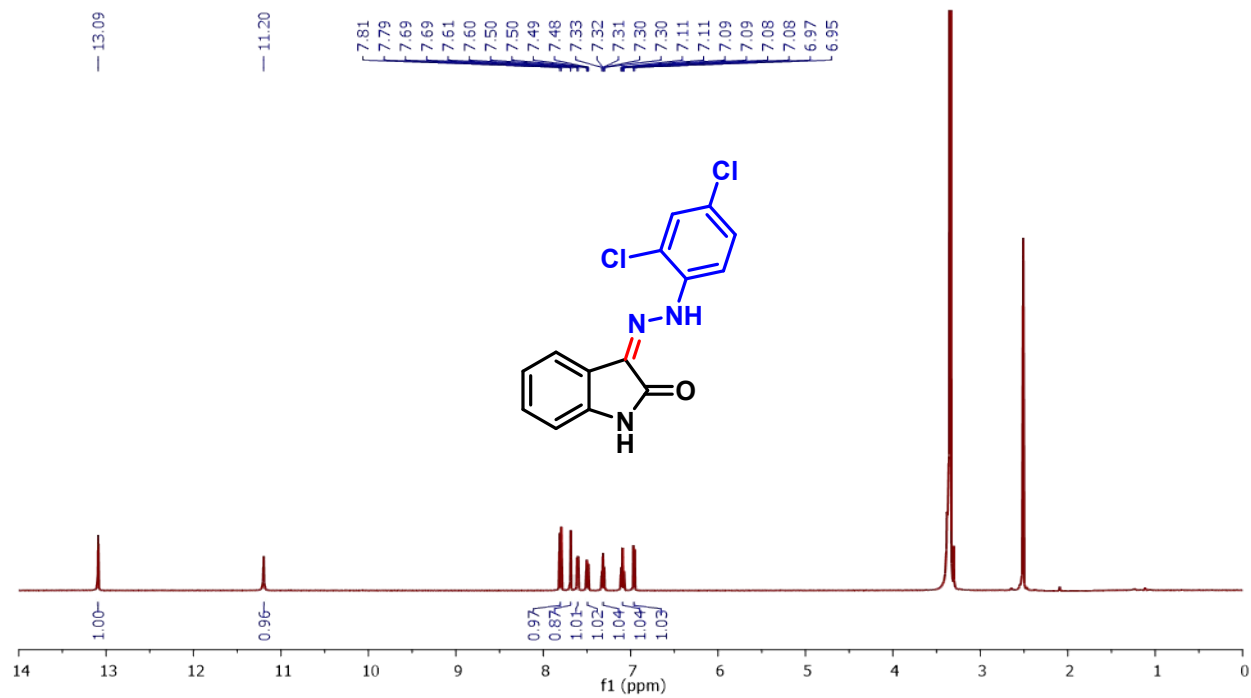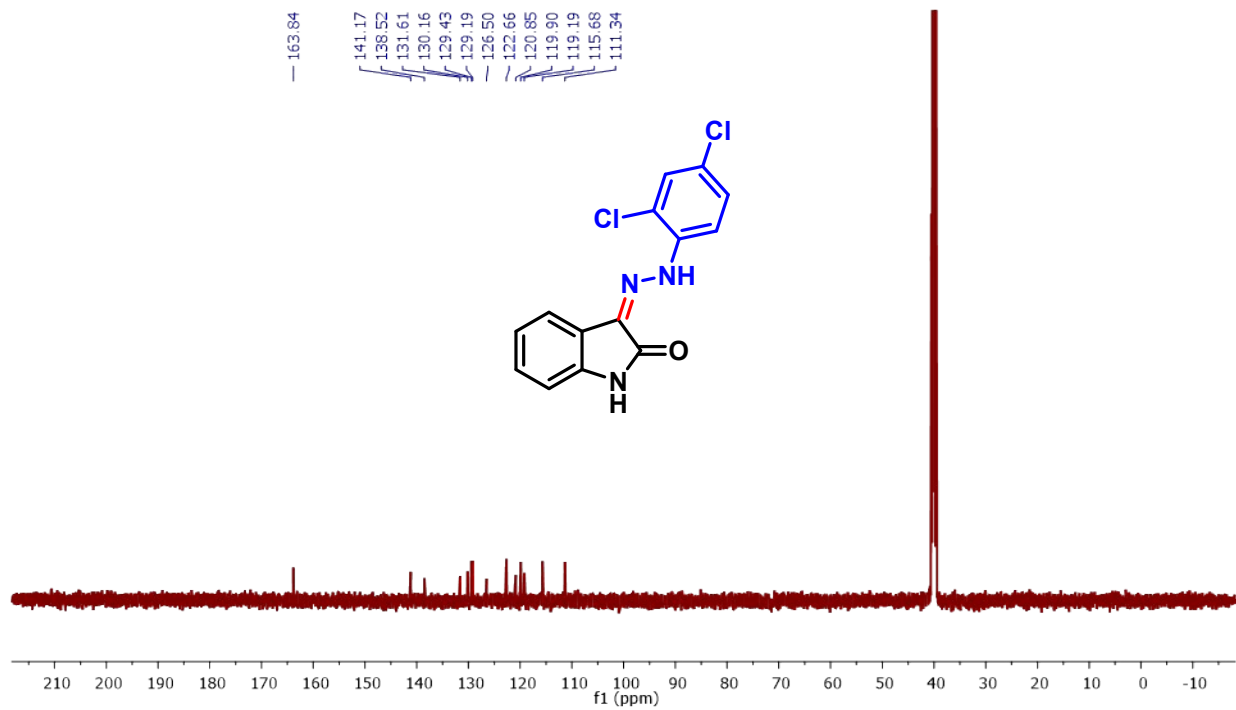

### 3-(2-(2,4-dibromophenyl)hydrazineylidene)indolin-2-one (5i)

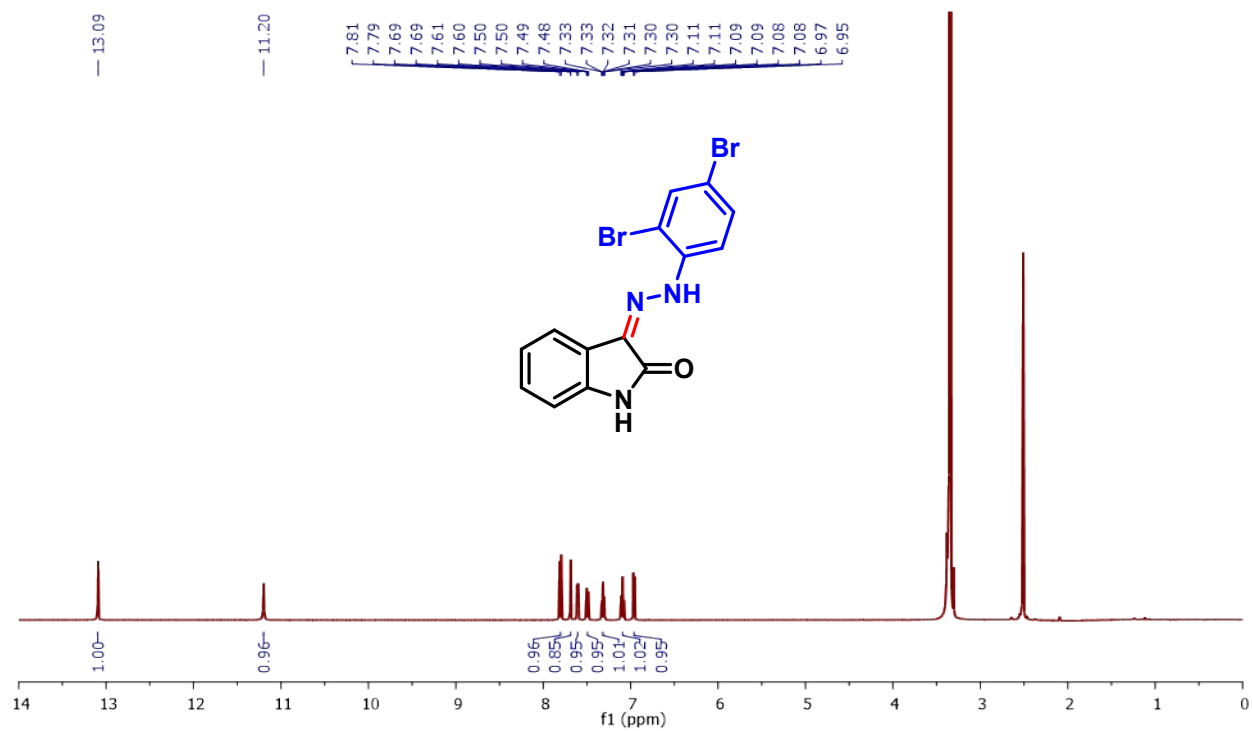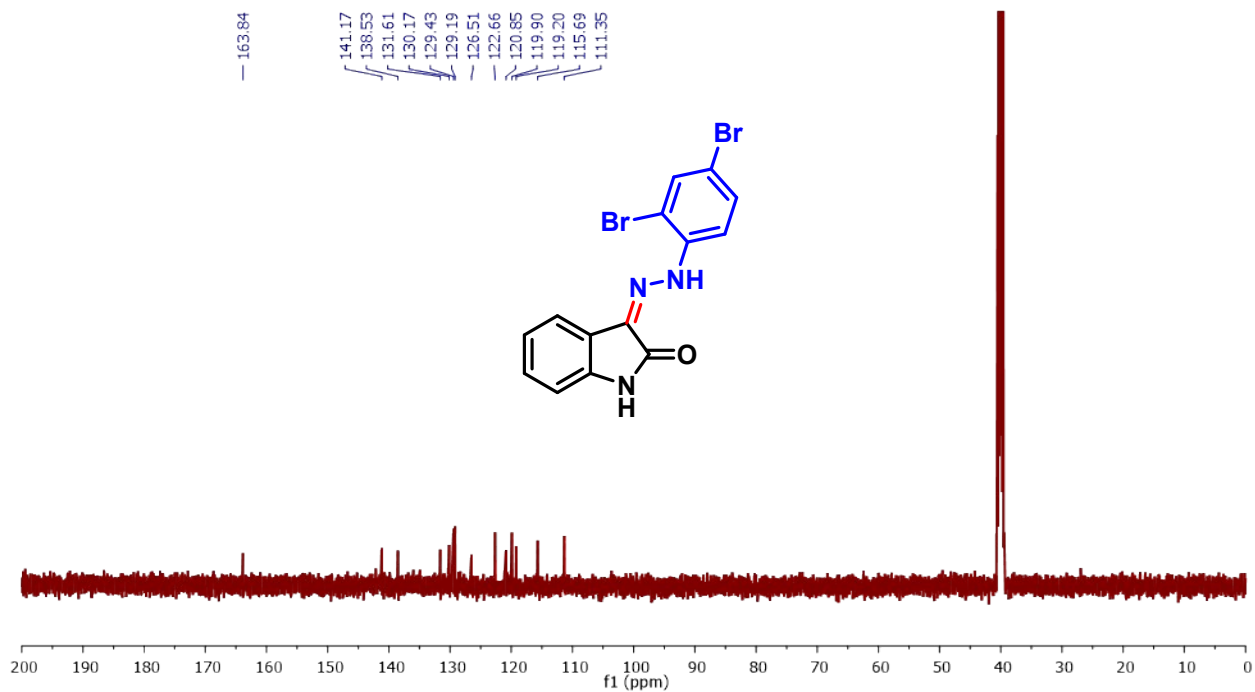

### 3-(2-(3,4-dichlorophenyl)hydrazineylidene)indolin-2-one (5j)

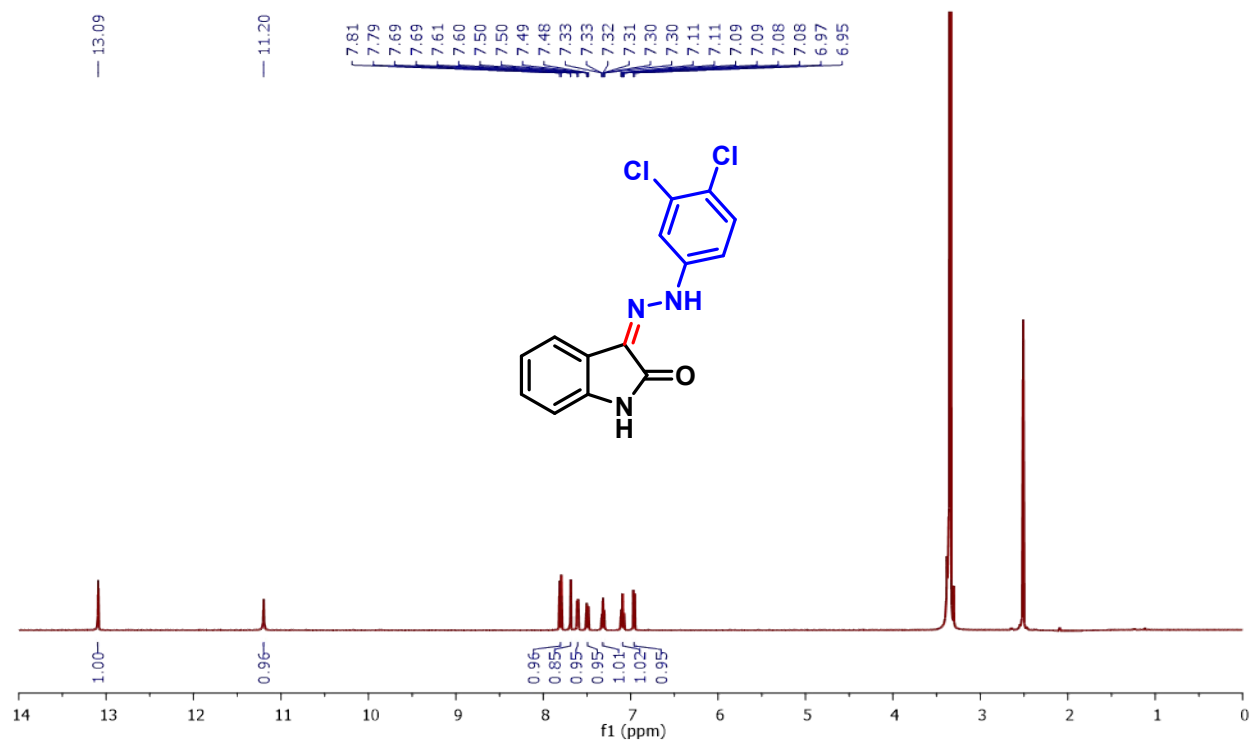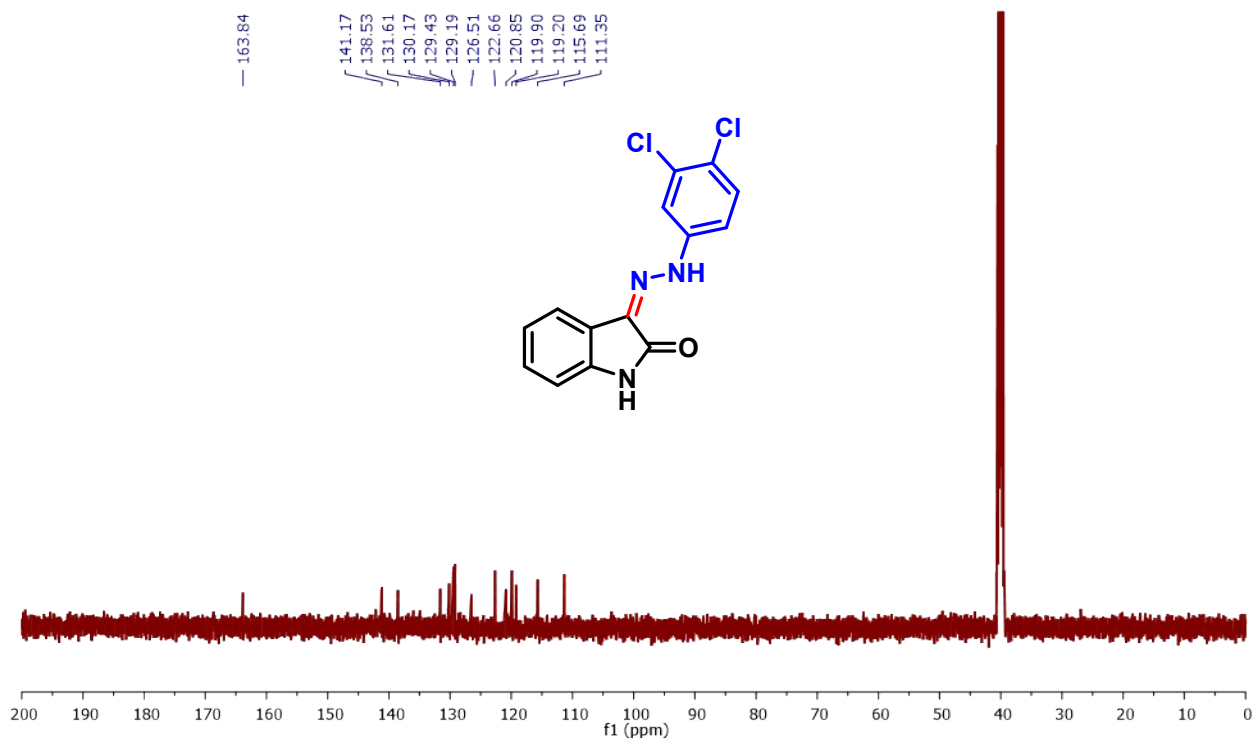

### 3-(2-(2,4-dimethylphenyl)hydrazineylidene)indolin-2-one (5k)

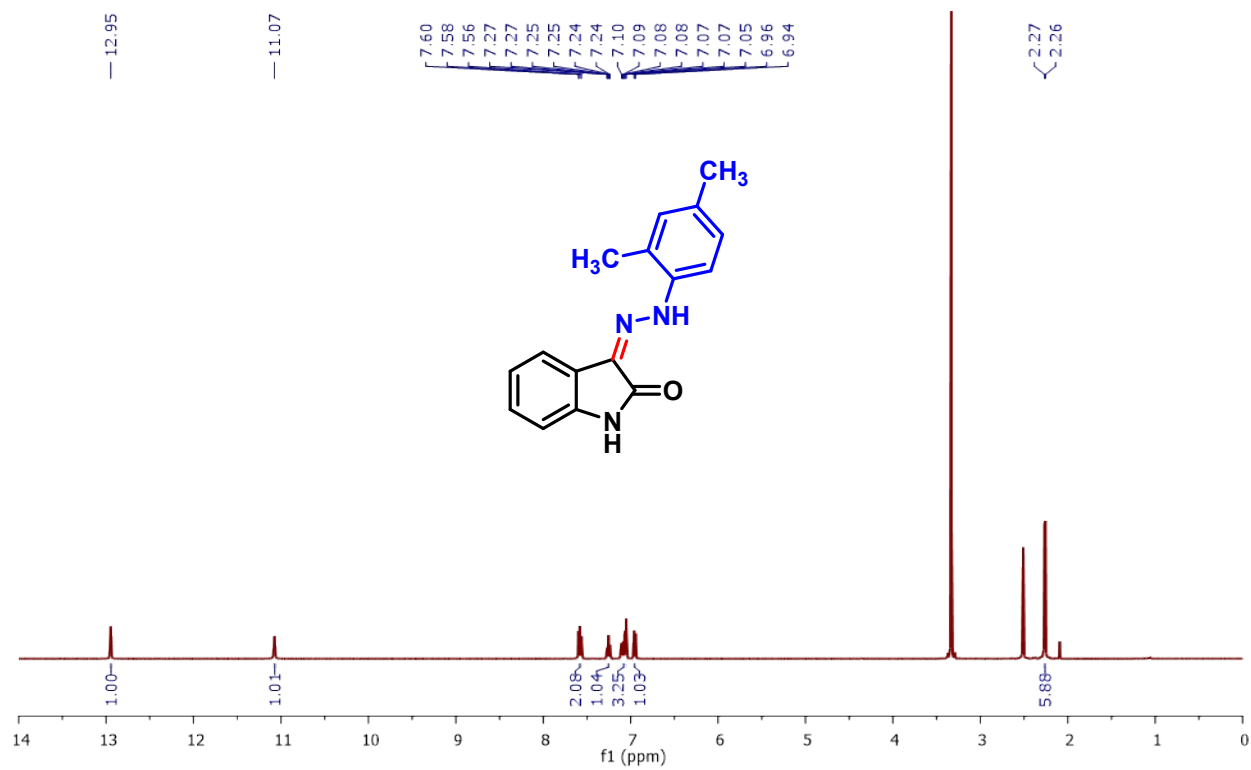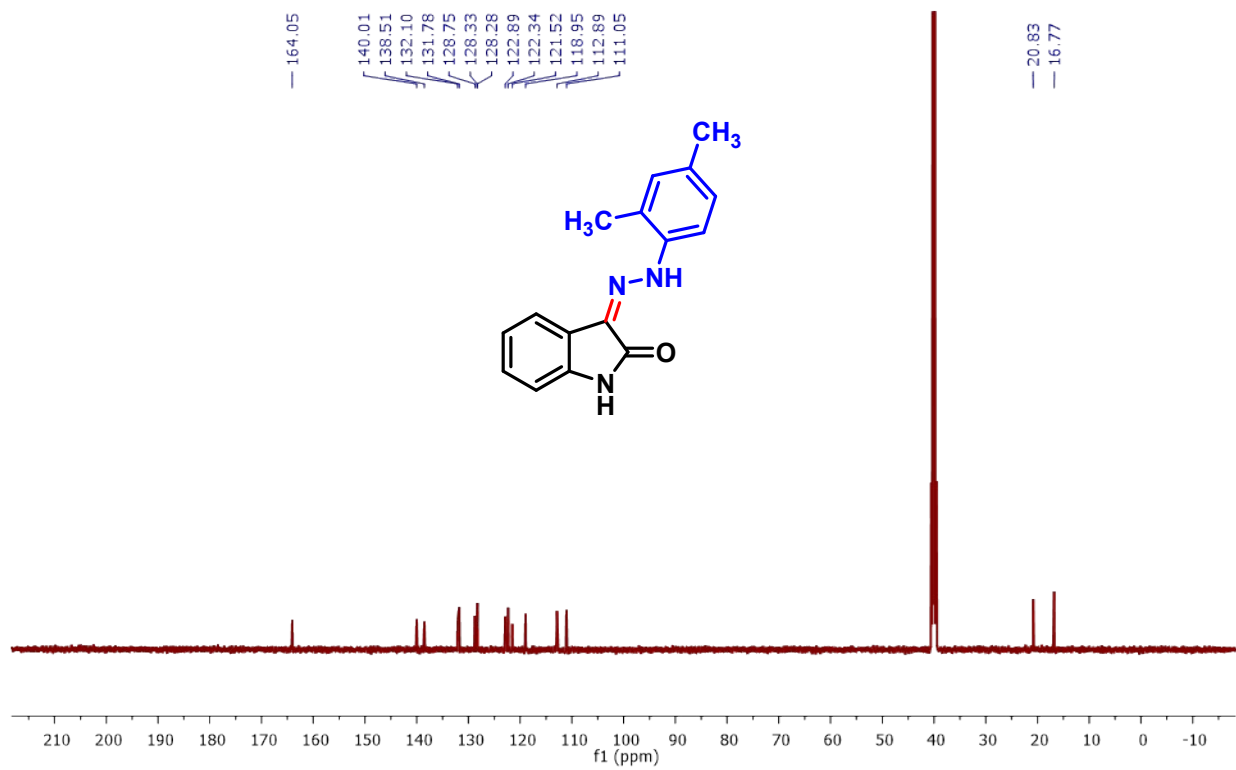

### 3-(2-(4-methoxyphenyl)hydrazineylidene)indolin-2-one (5I)

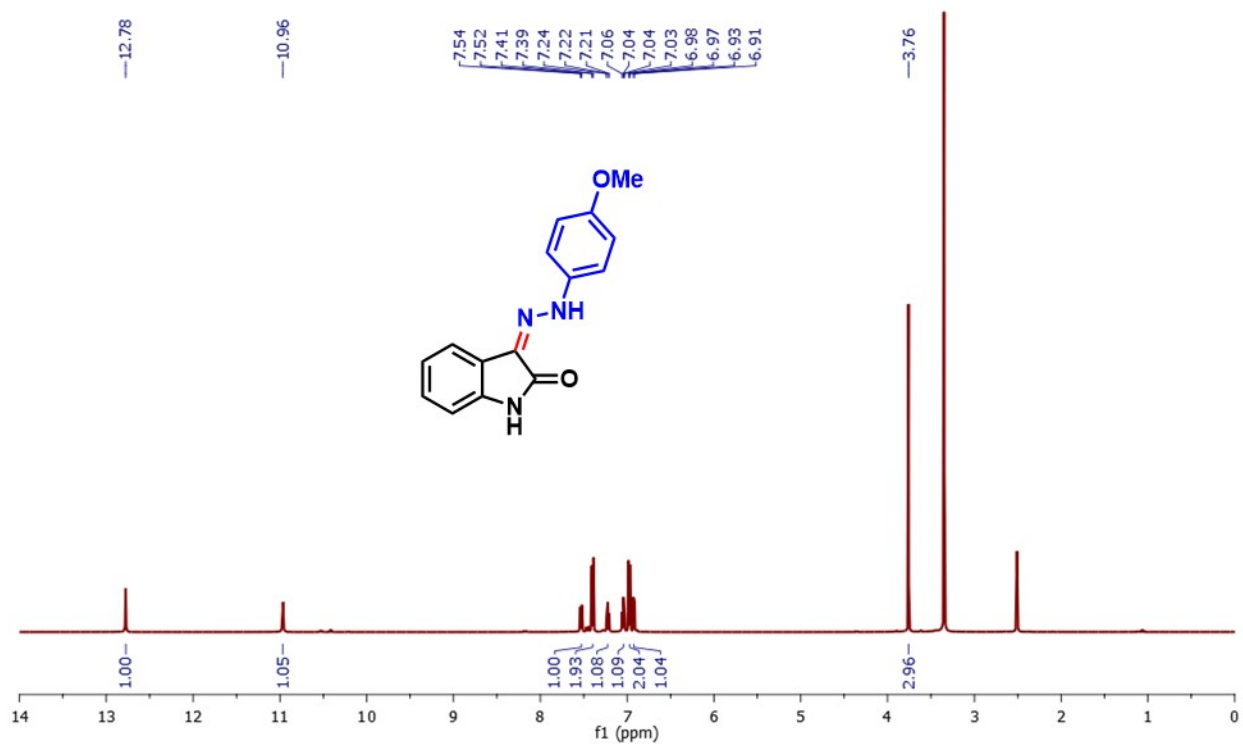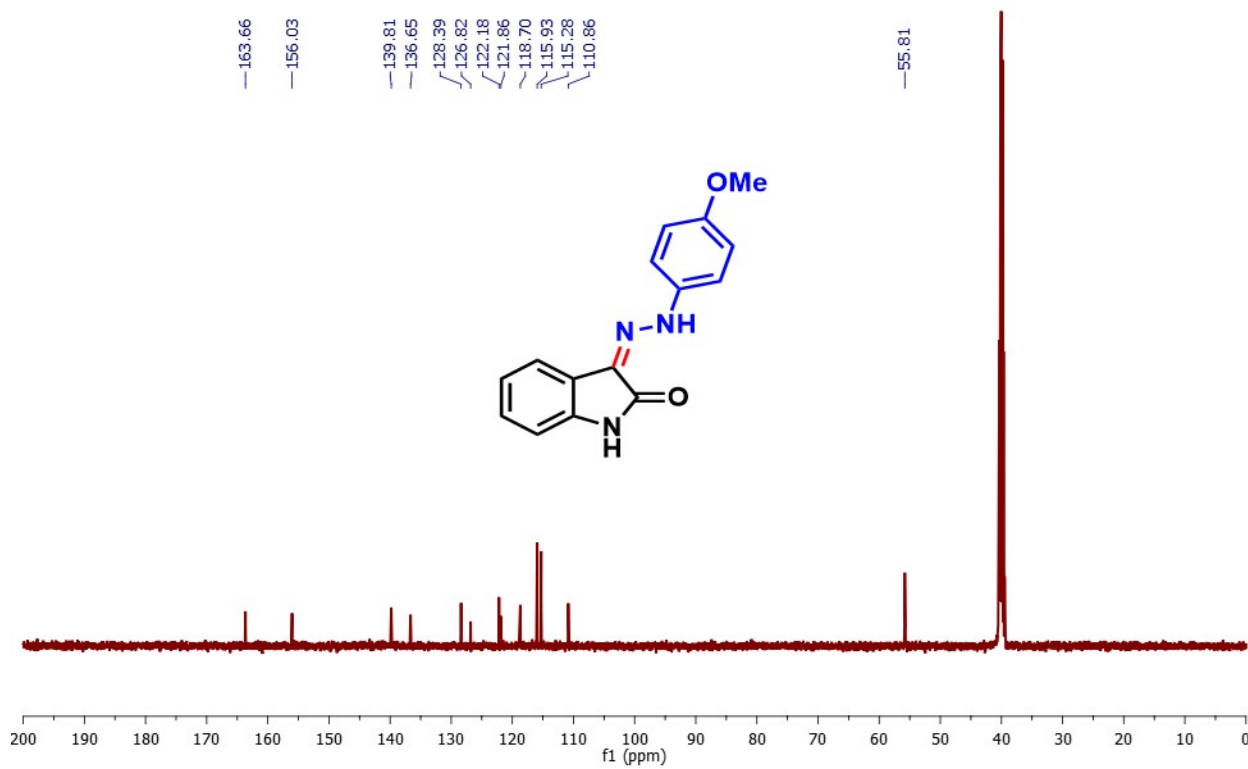

### 3-(2-(3,4-dimethylphenyl)hydrazineylidene)indolin-2-one (5m)

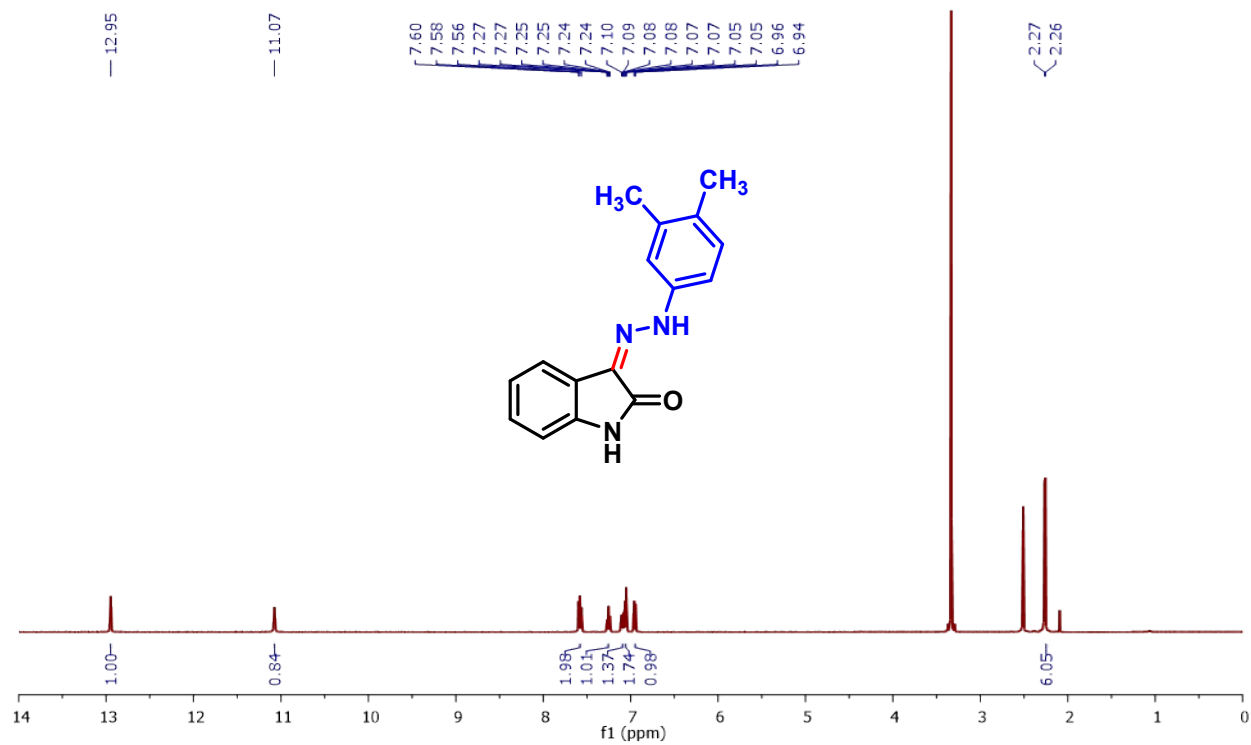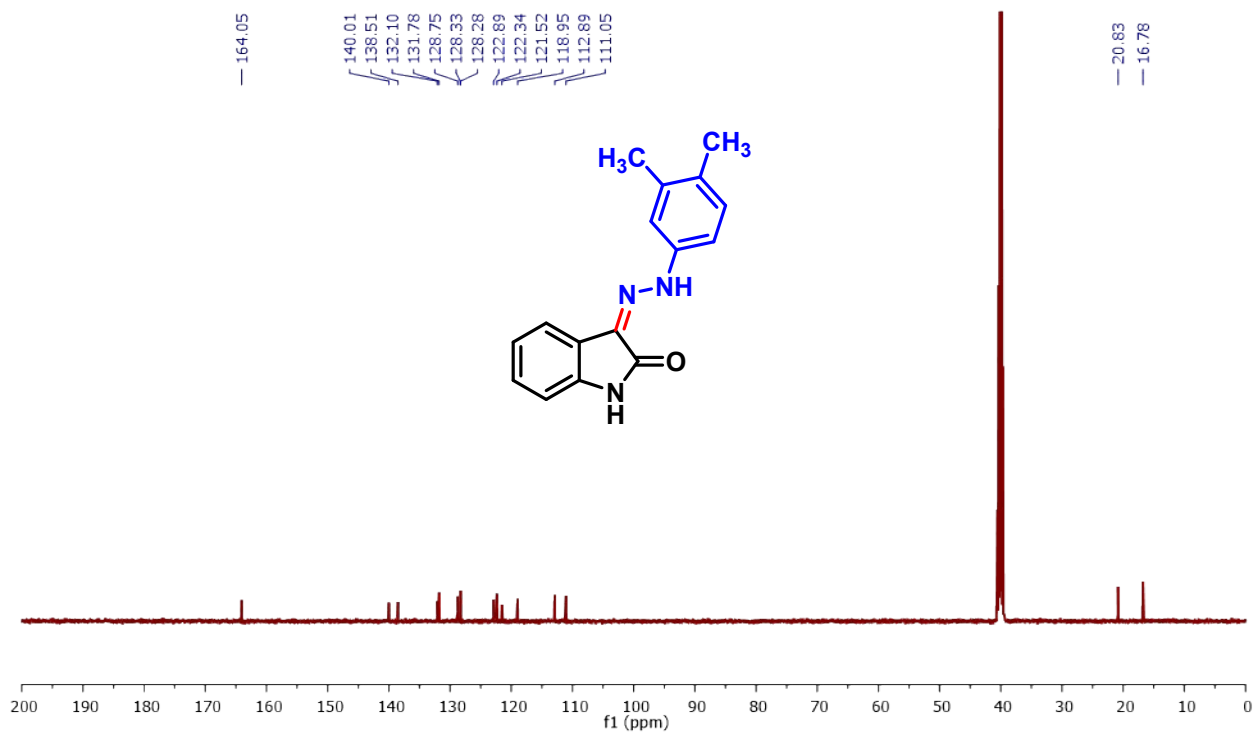

### 3-(2-(4-isopropylphenyl)hydrazineylidene)indolin-2-one(5n)

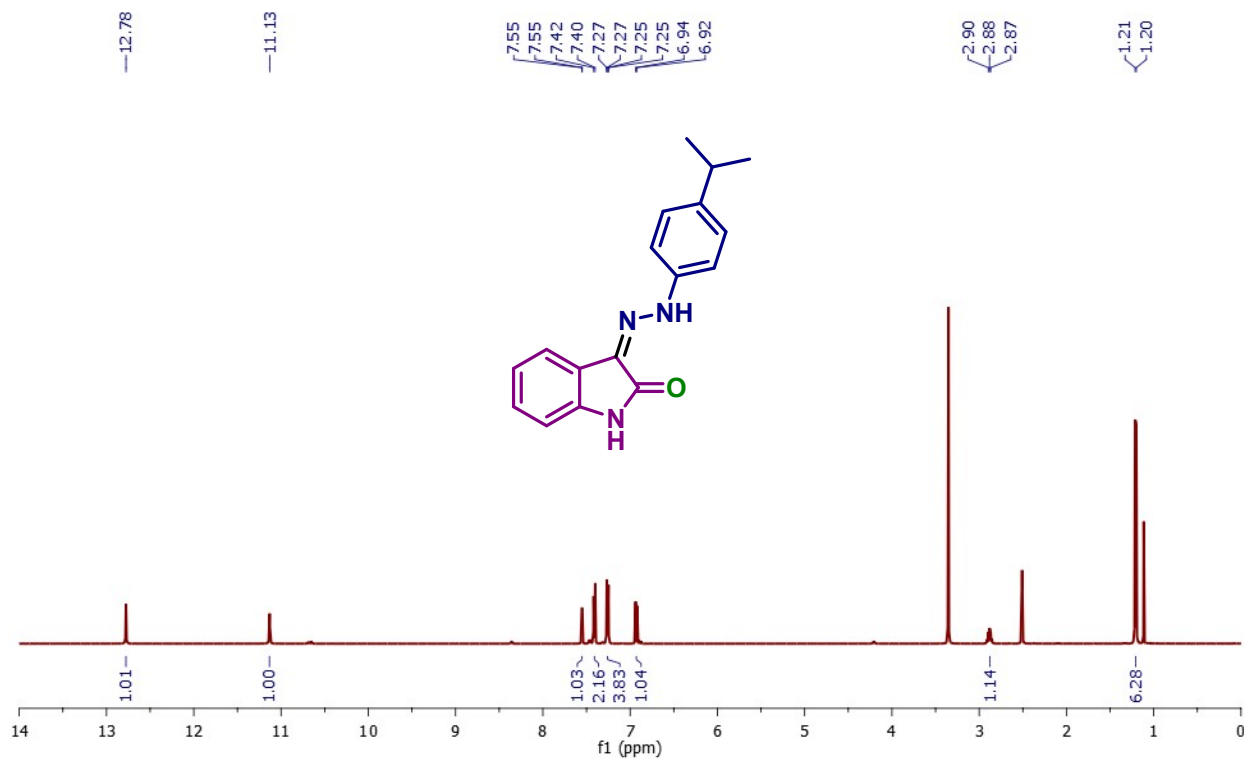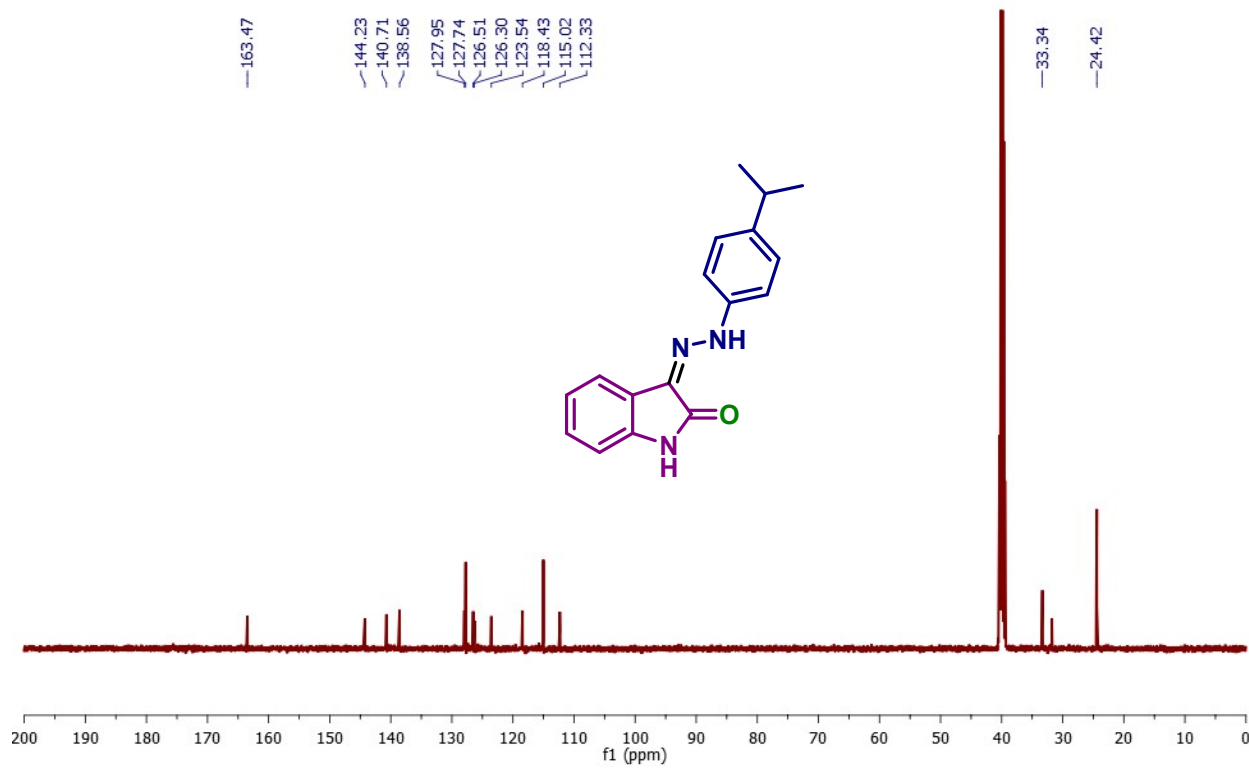



### 3-(2-mesitylhydrazineylidene)indolin-2-one (5o)

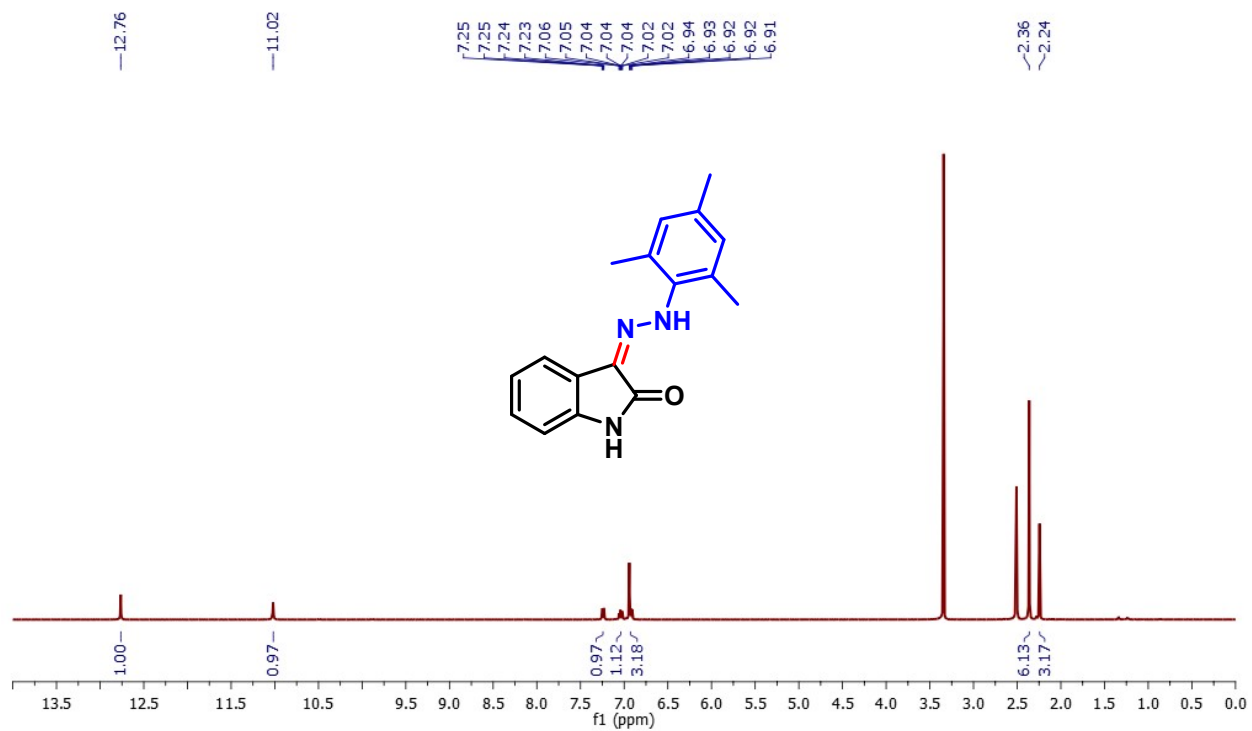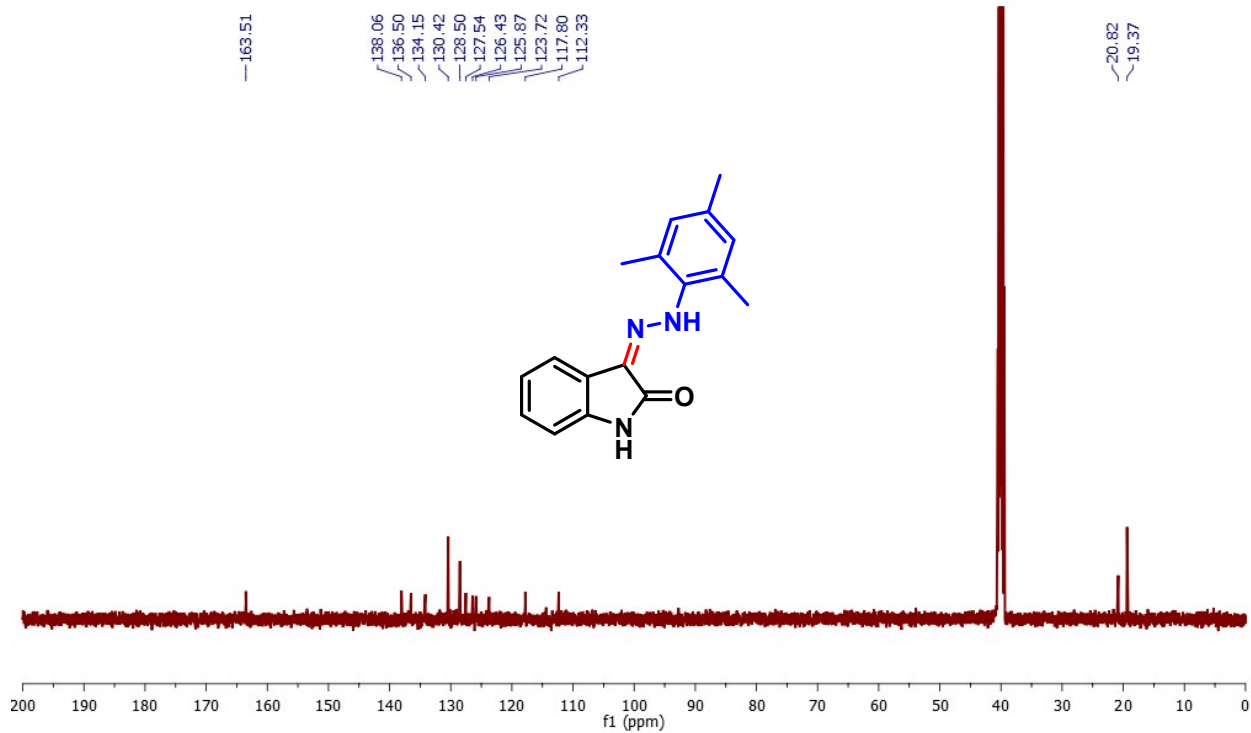

### 3-(2-(benzo[d]thiazol-2-yl)hydrazineylidene)indolin-2-one (5p)

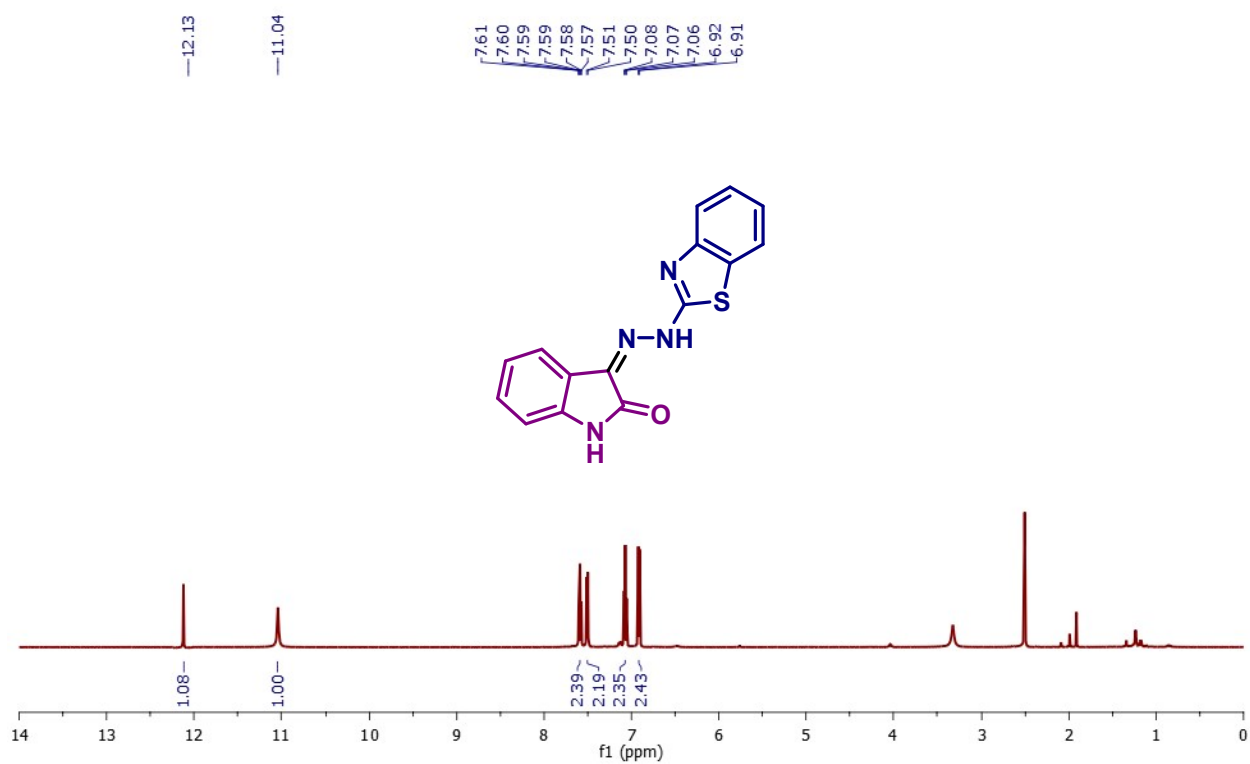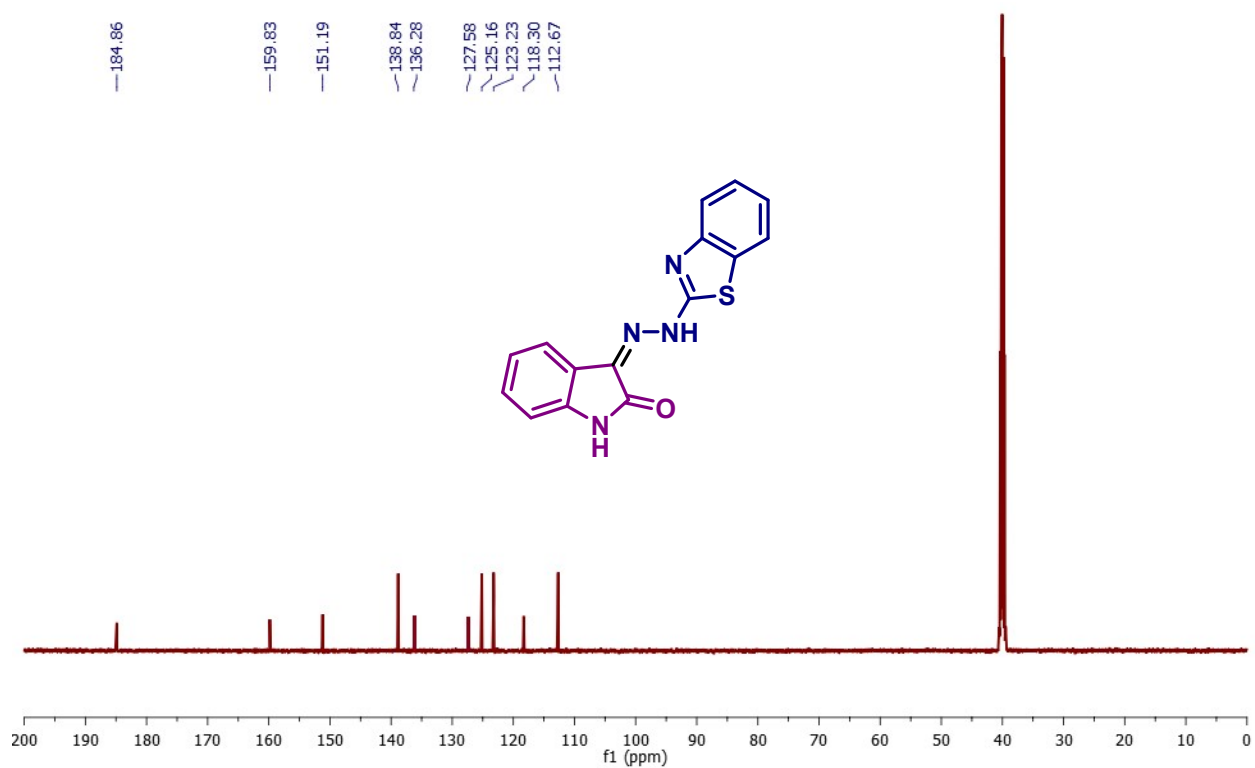

### 1-benzylidene-2-phenylhydrazine (6a)

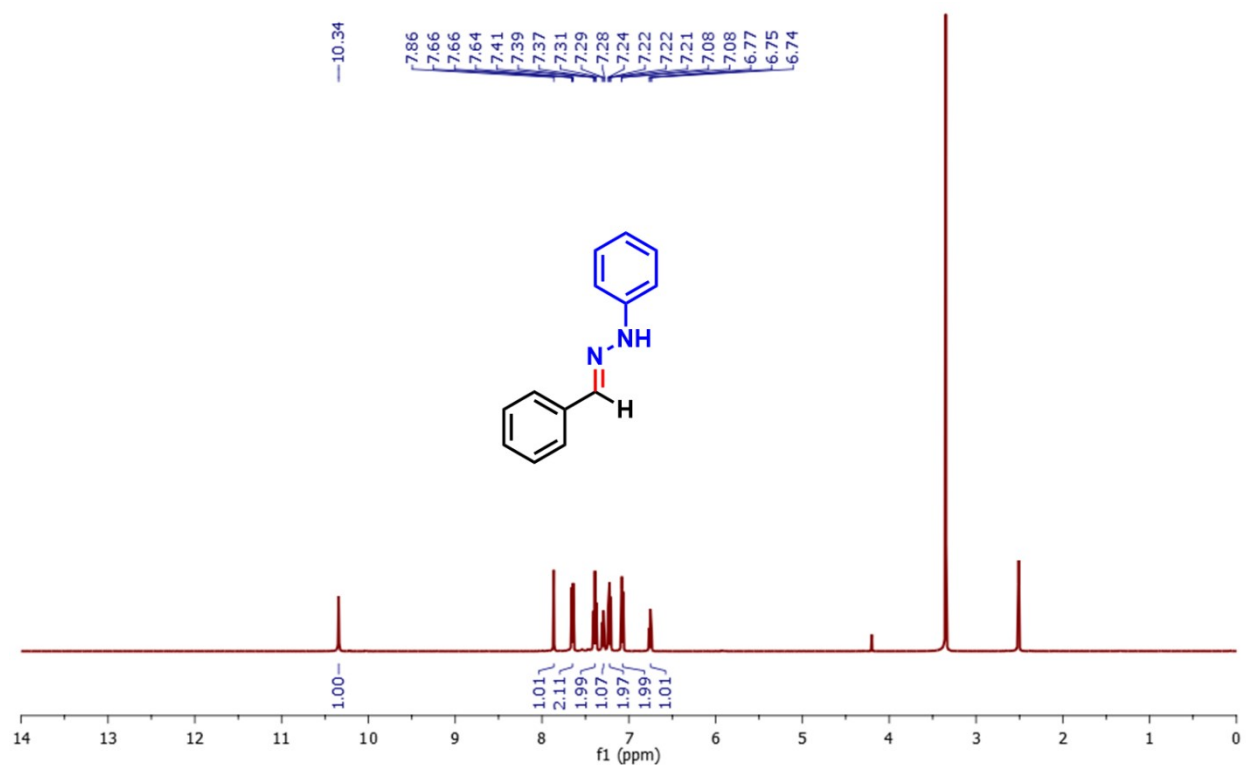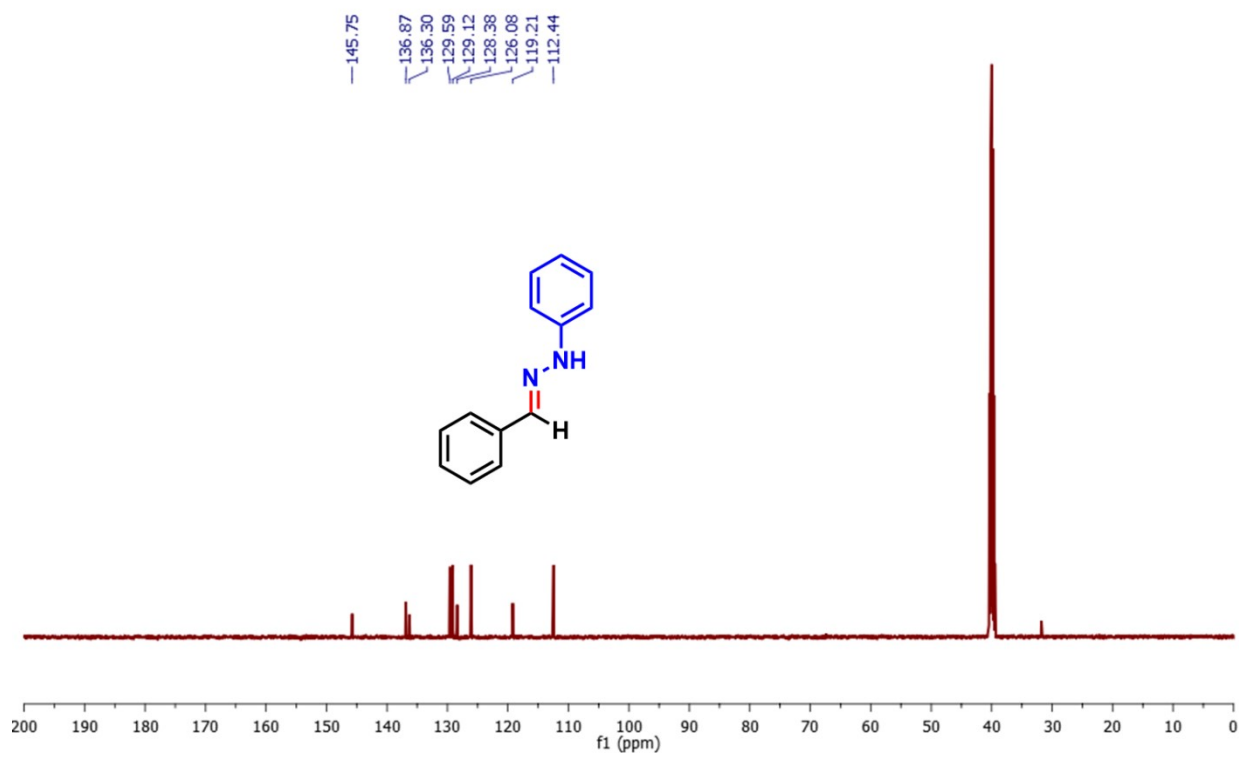

### 1-(3-chlorobenzylidene)-2-phenylhydrazine (6b)

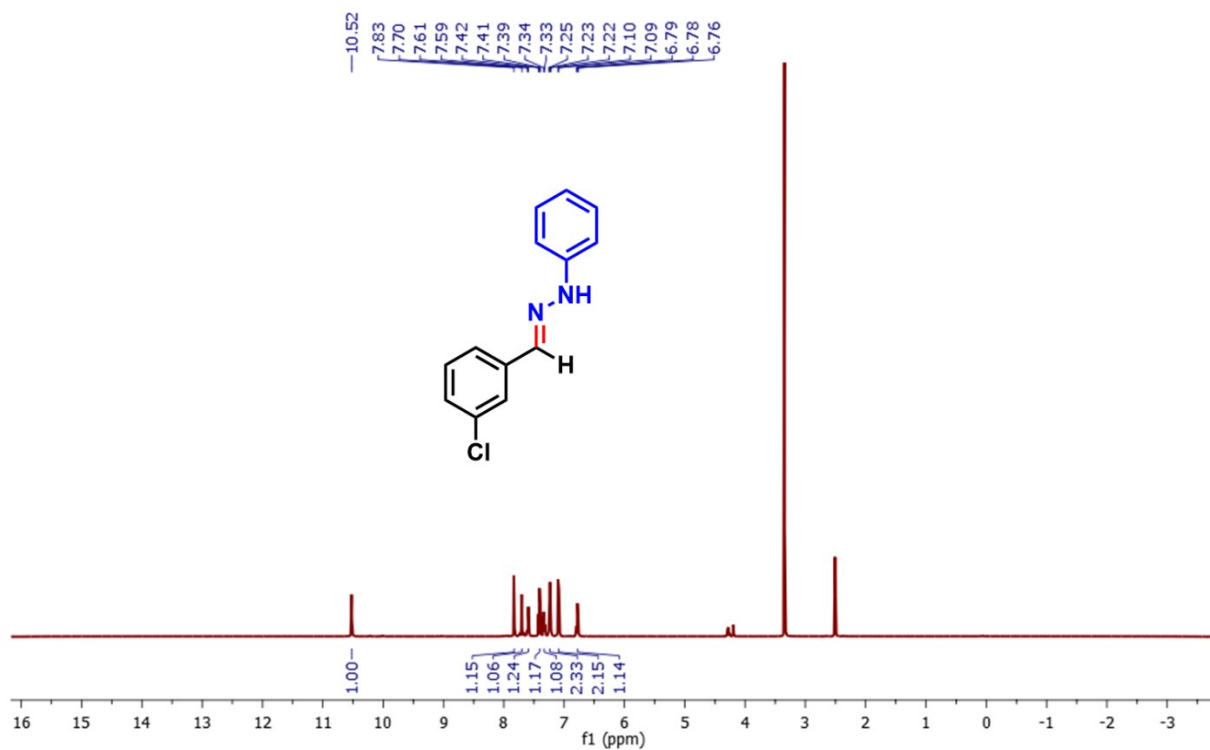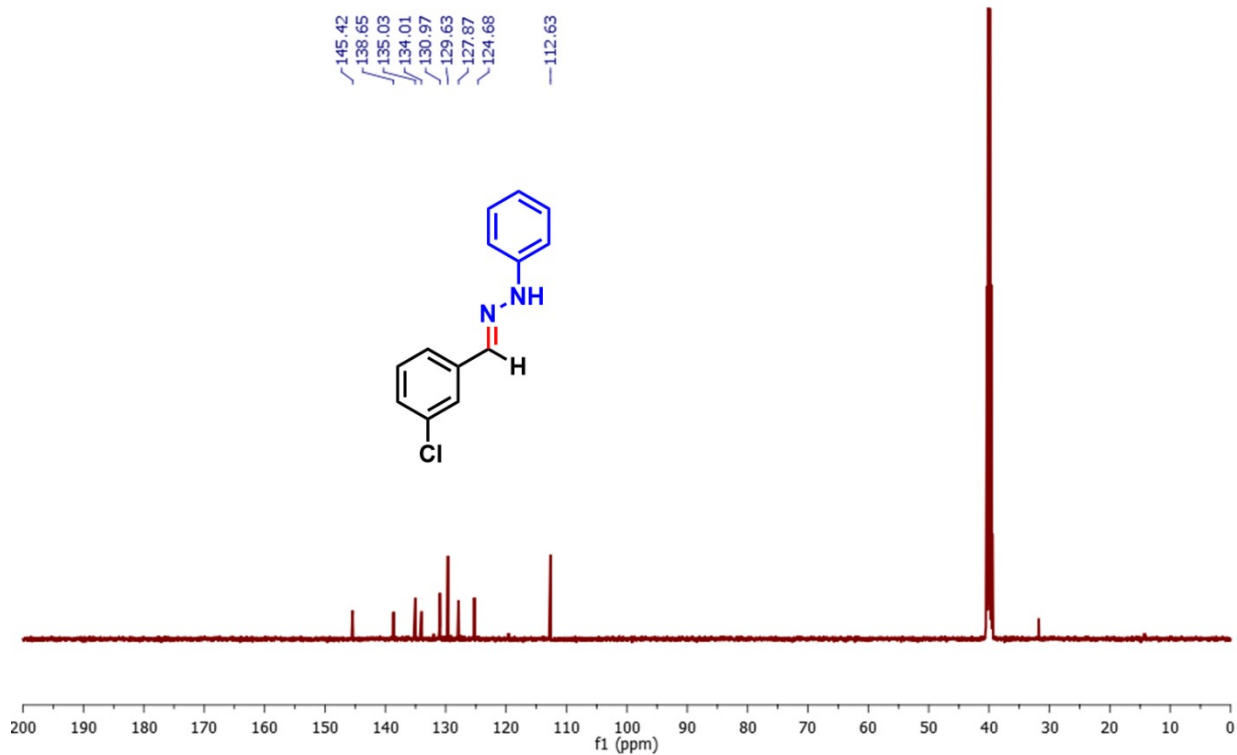

# 1-(2,4-dichlorobenzylidene)-2-phenylhydrazine (6c)

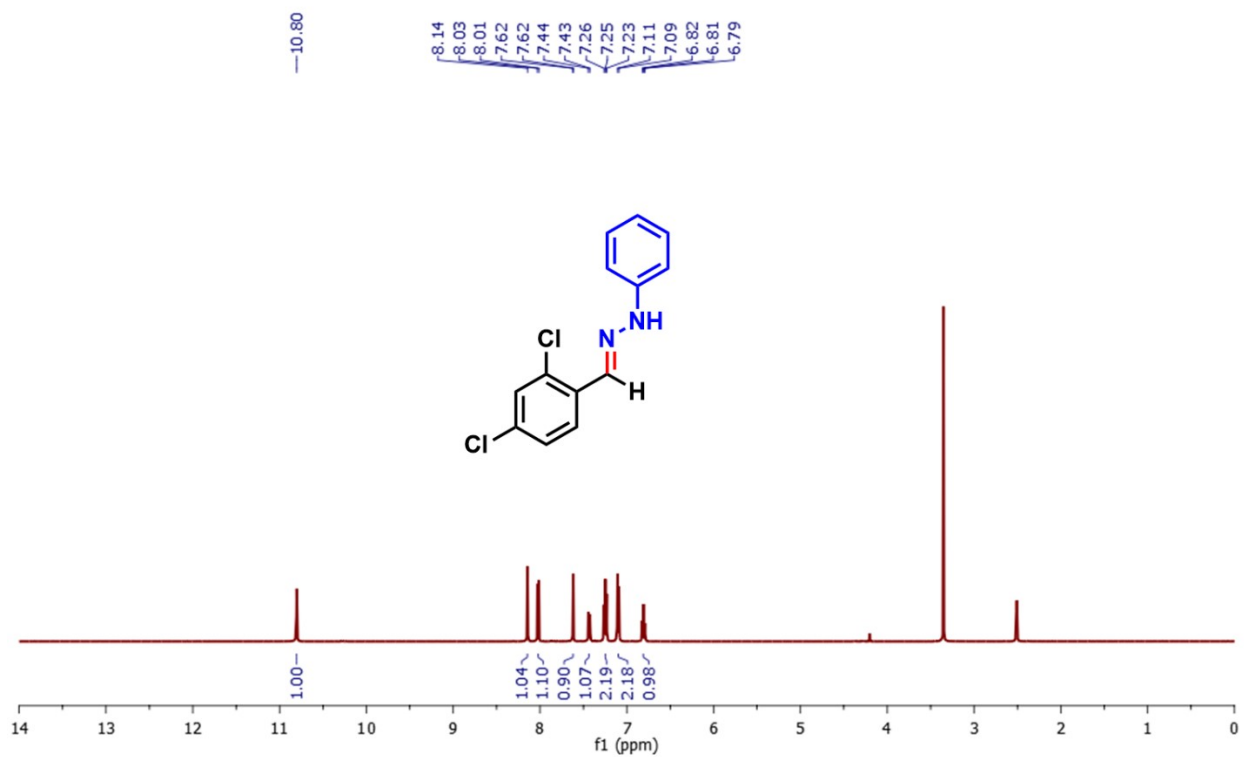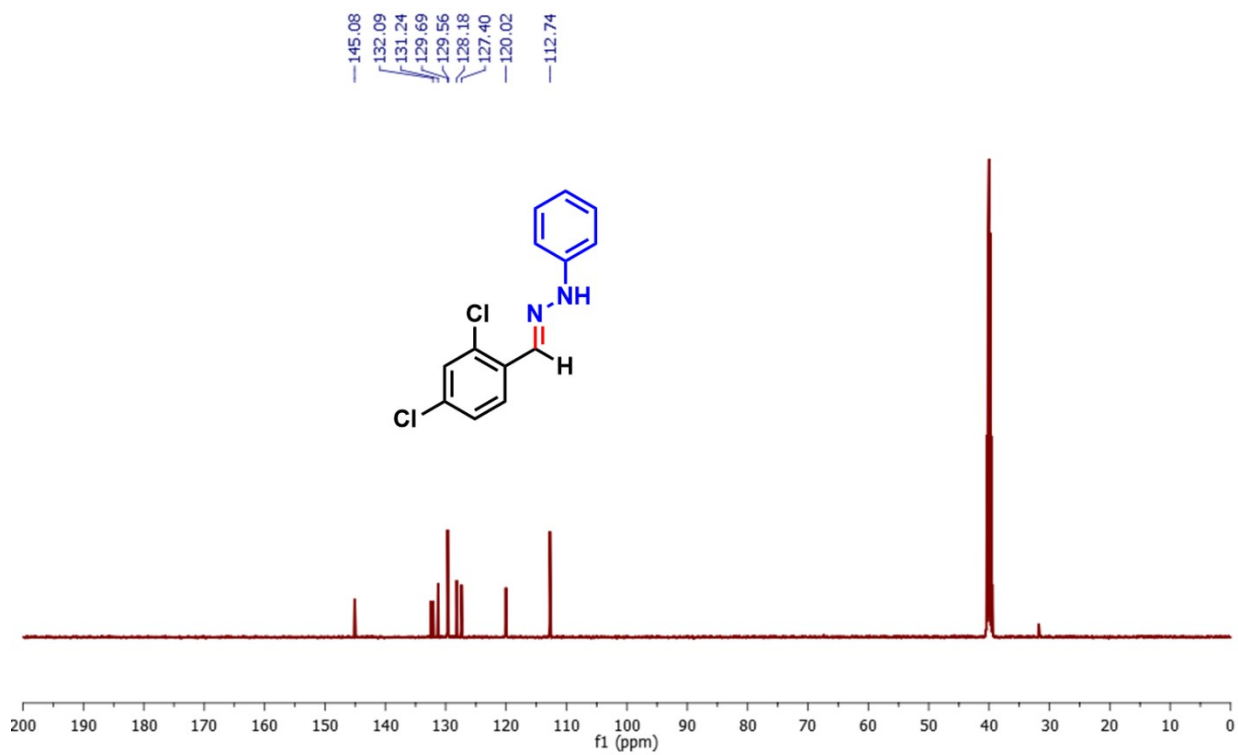

### 1-(3,4-dichlorobenzylidene)-2-phenylhydrazine (6d)

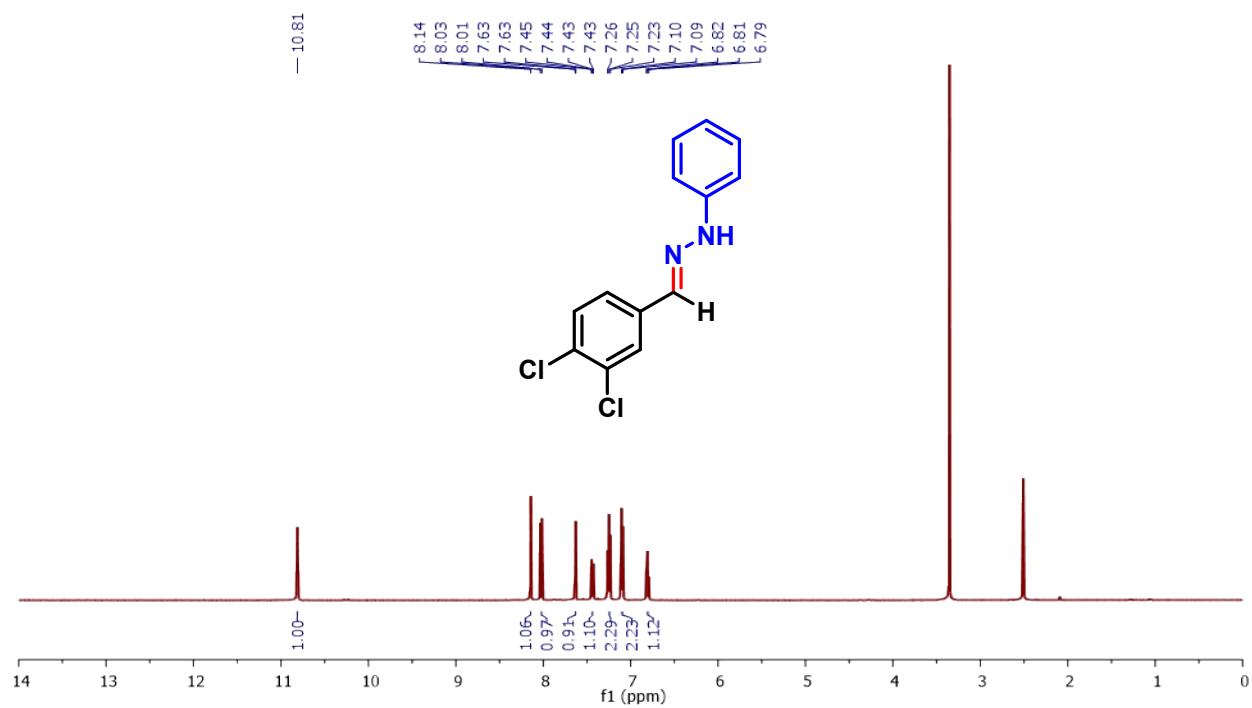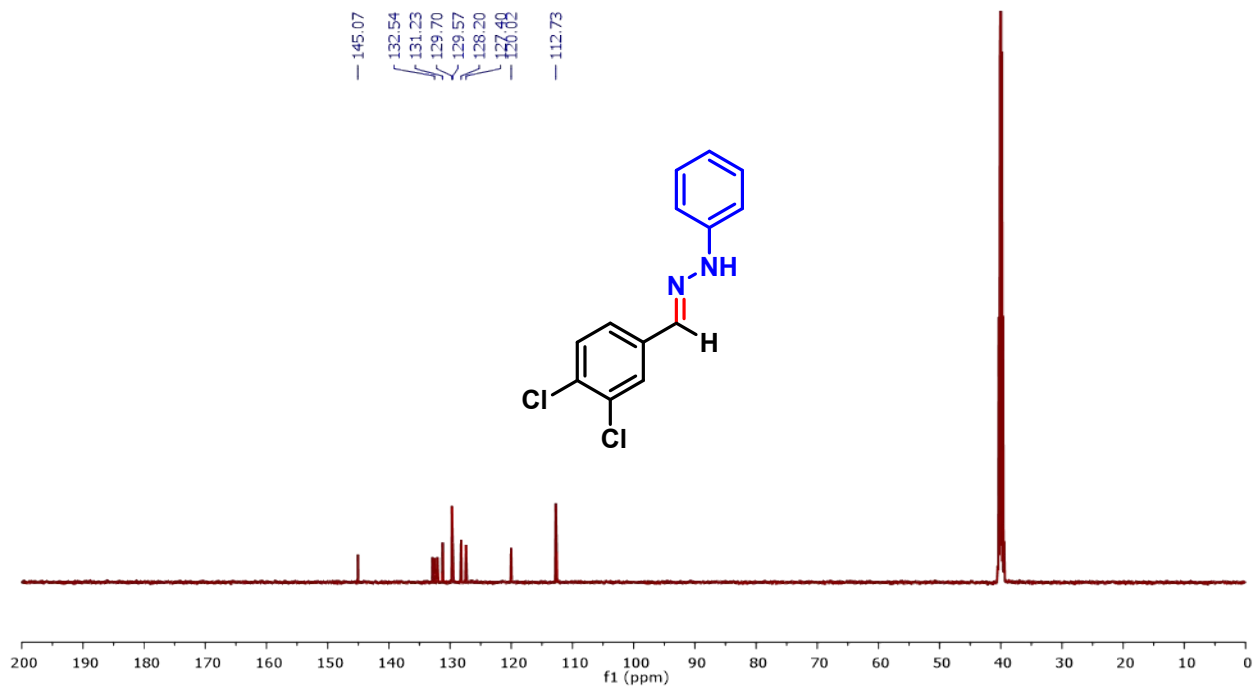

### 1-(3-bromobenzylidene)-2-phenylhydrazine (6e)

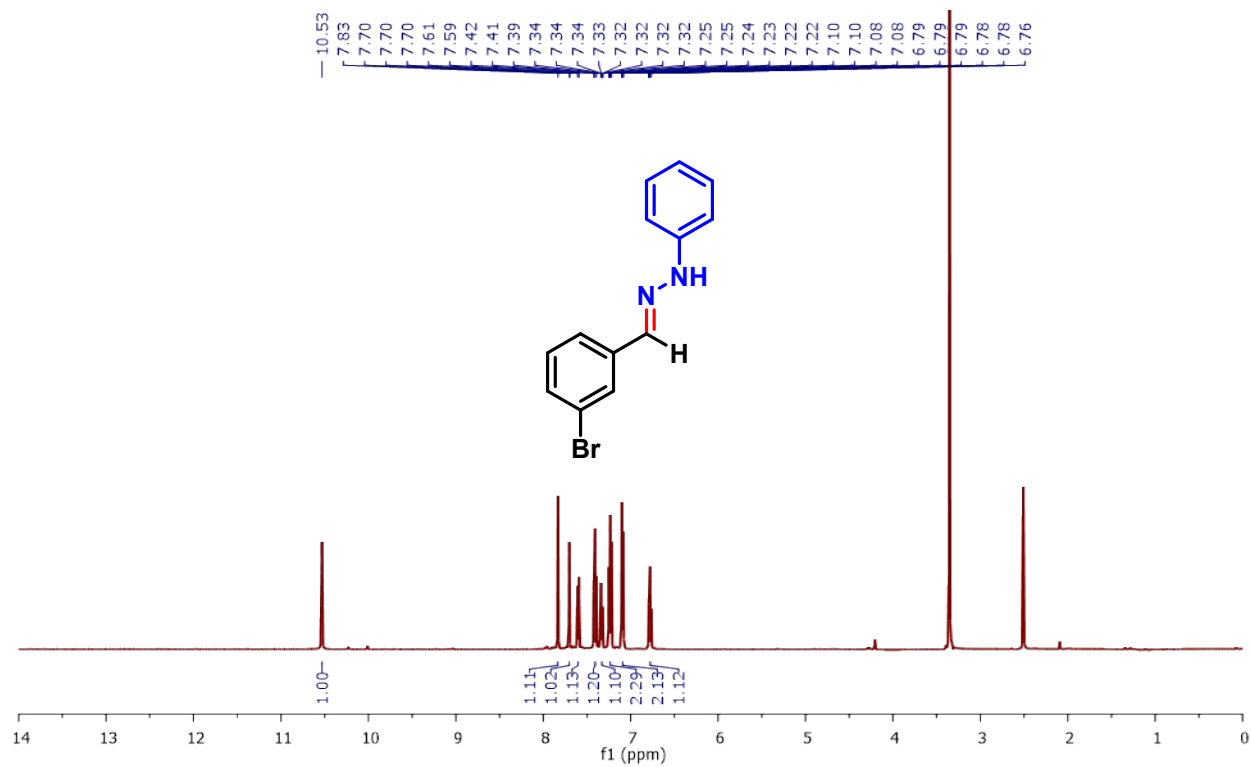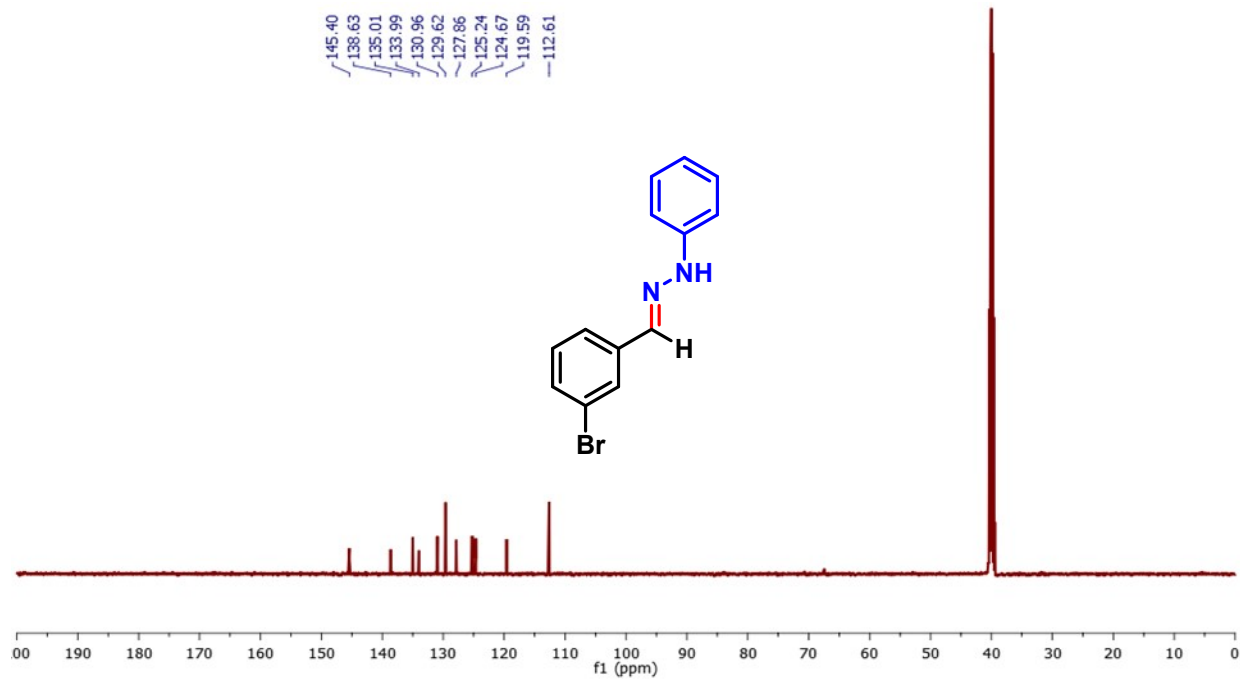

### 1-(2,4-dibromobenzylidene)-2-phenylhydrazine (6f)

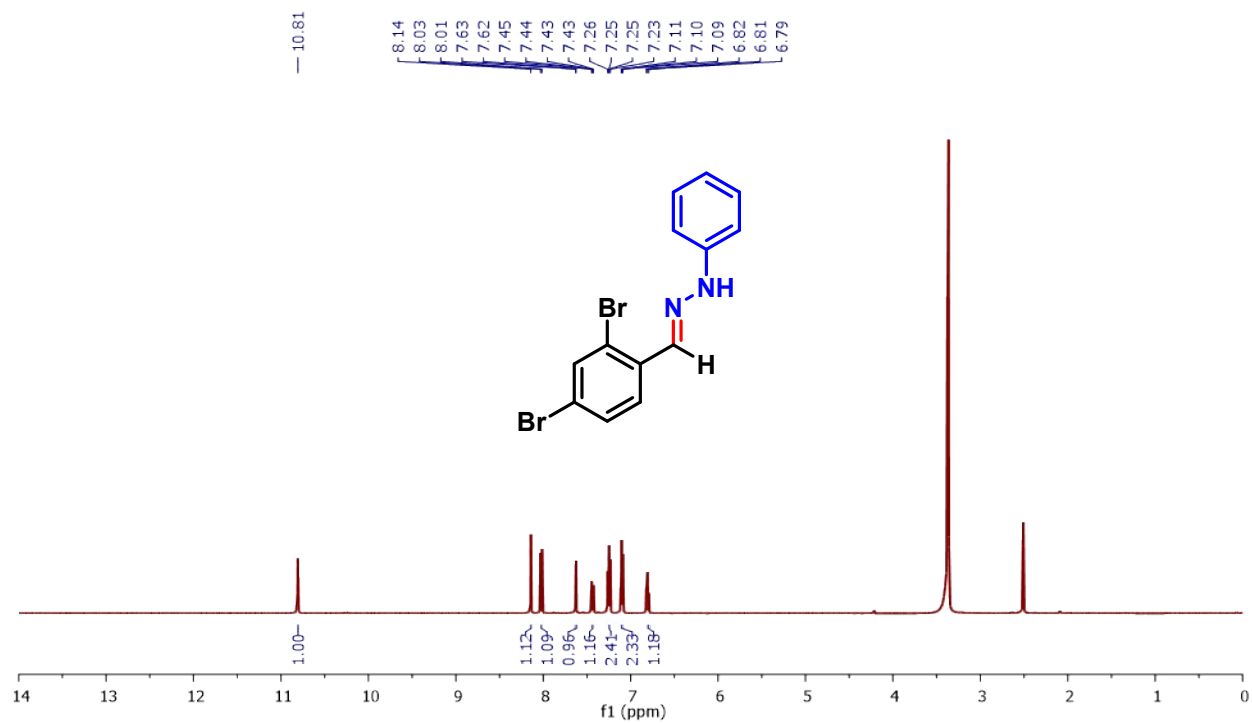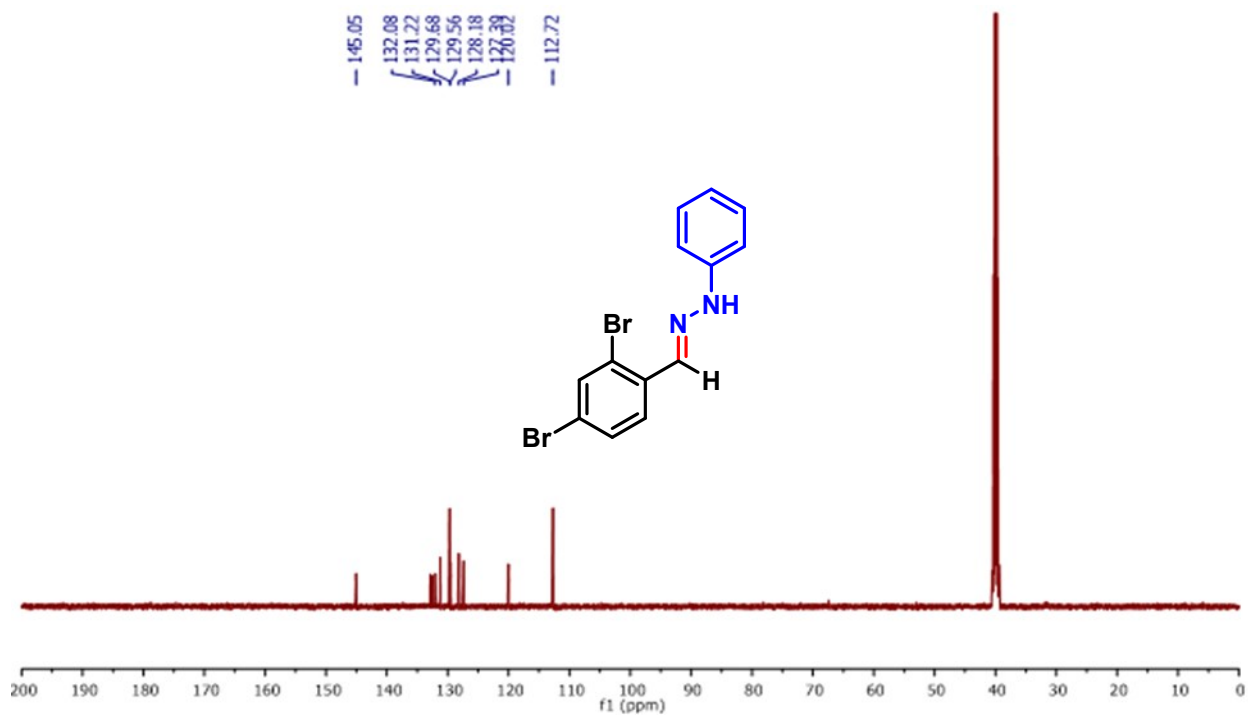



# 1-(4-nitrobenzylidene)-2-phenylhydrazine (6g)

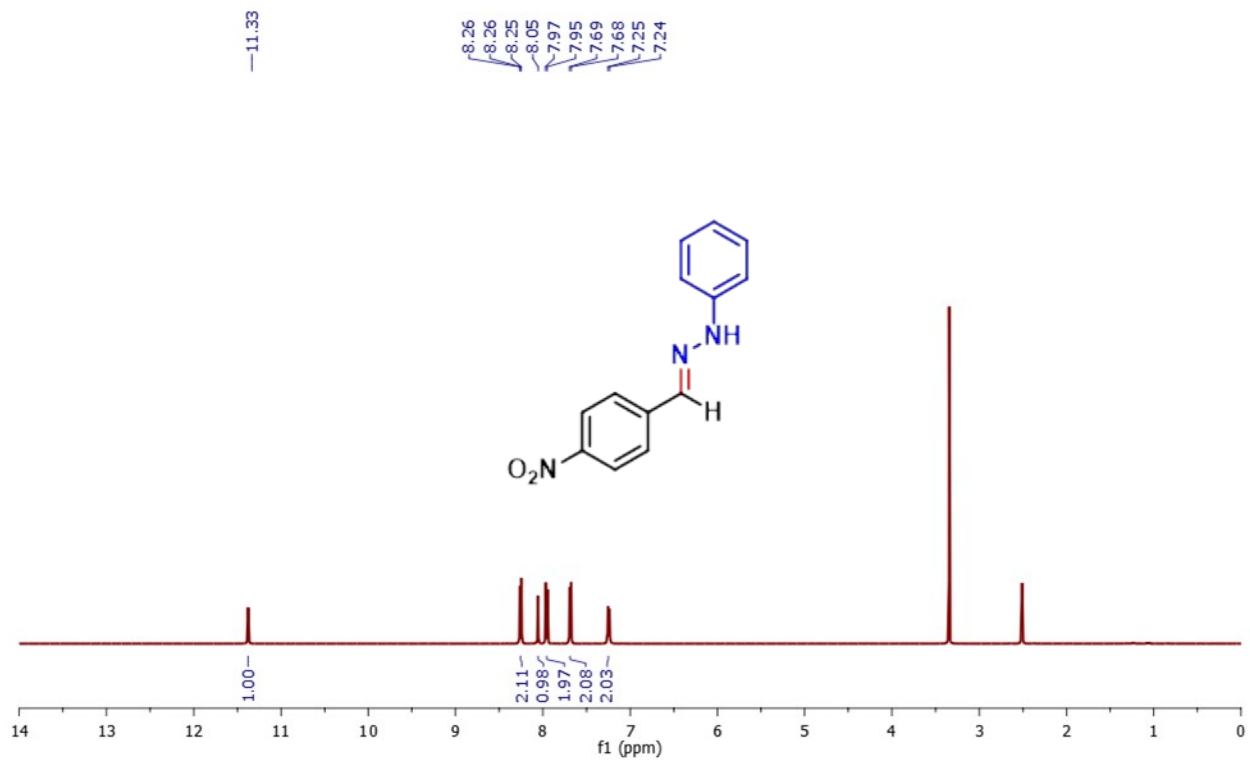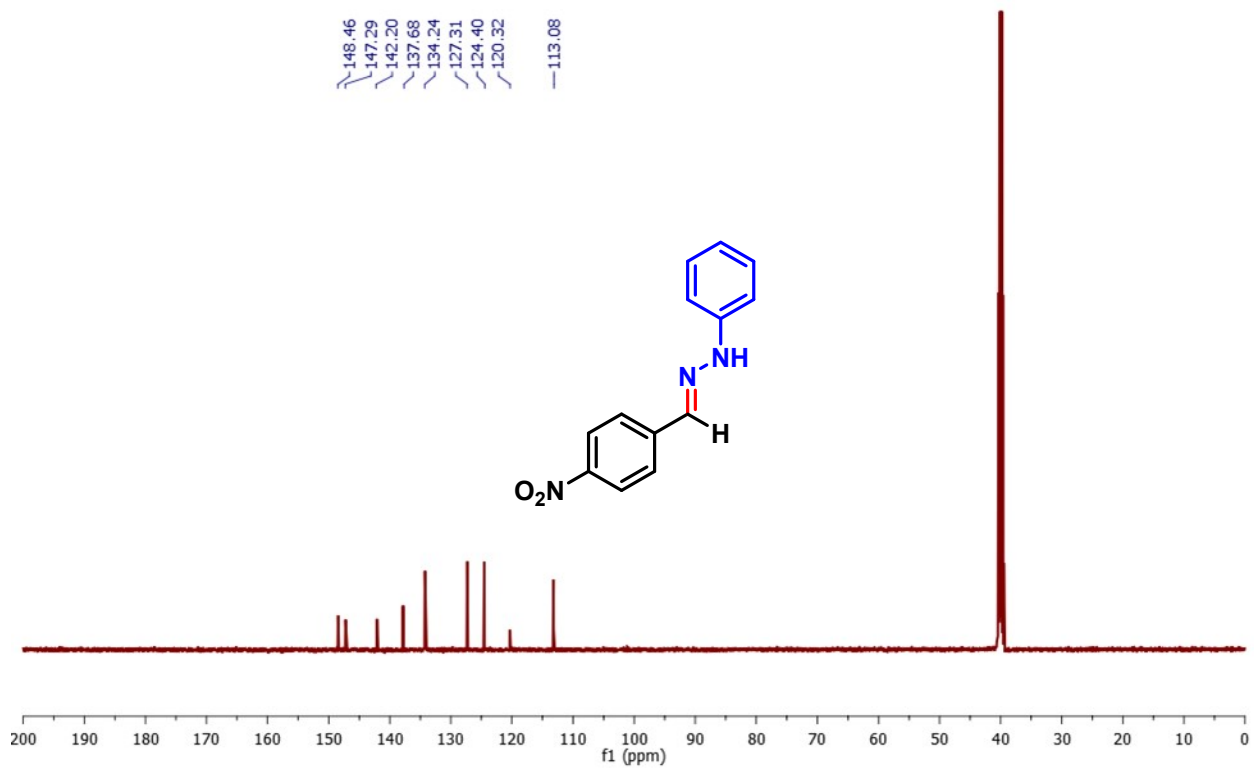

### 1-(3-nitrobenzylidene)-2-phenylhydrazine (6h)

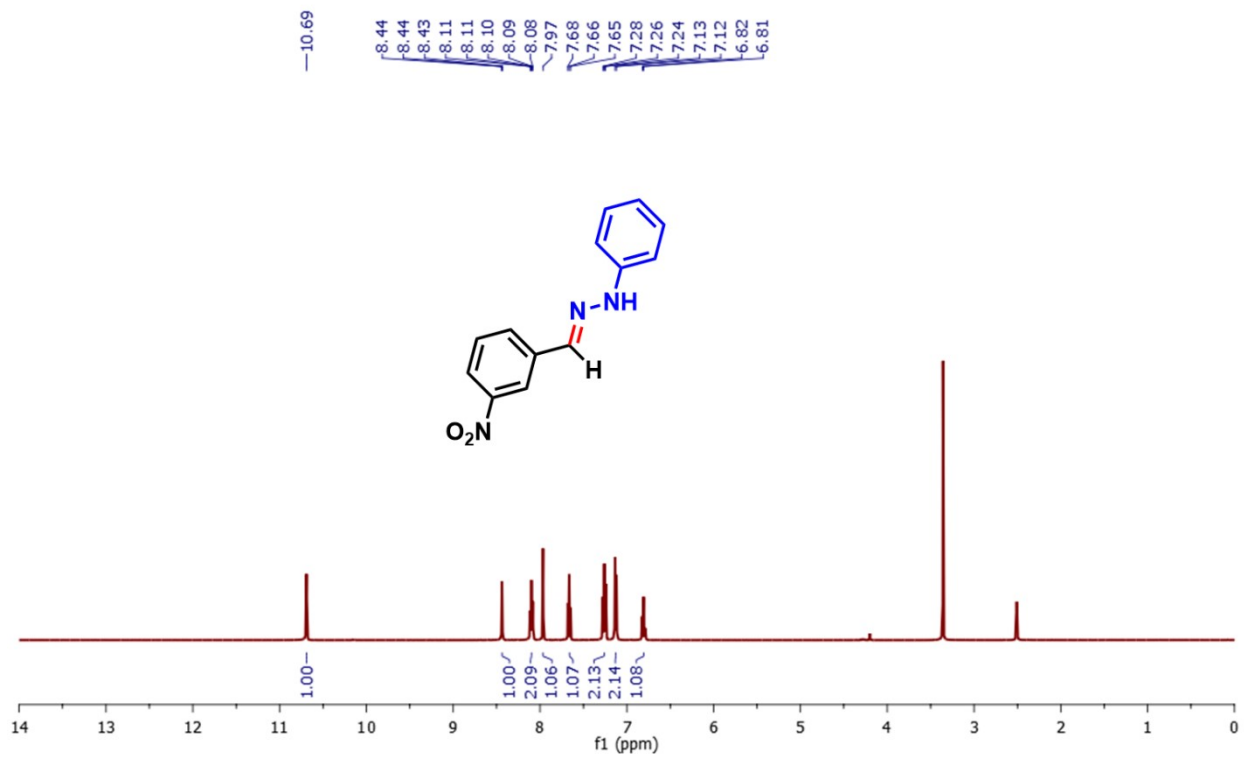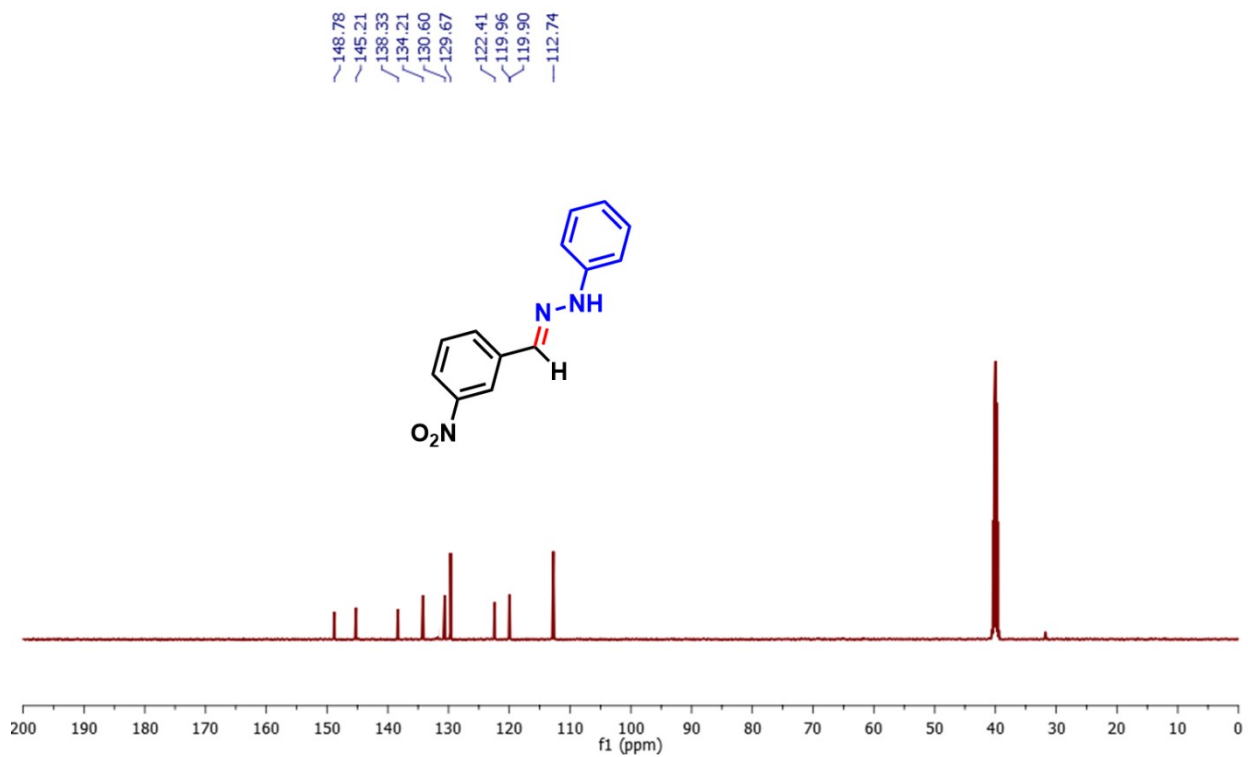

### 1-(3,4-dimethoxybenzylidene)-2-phenylhydrazine (6i)

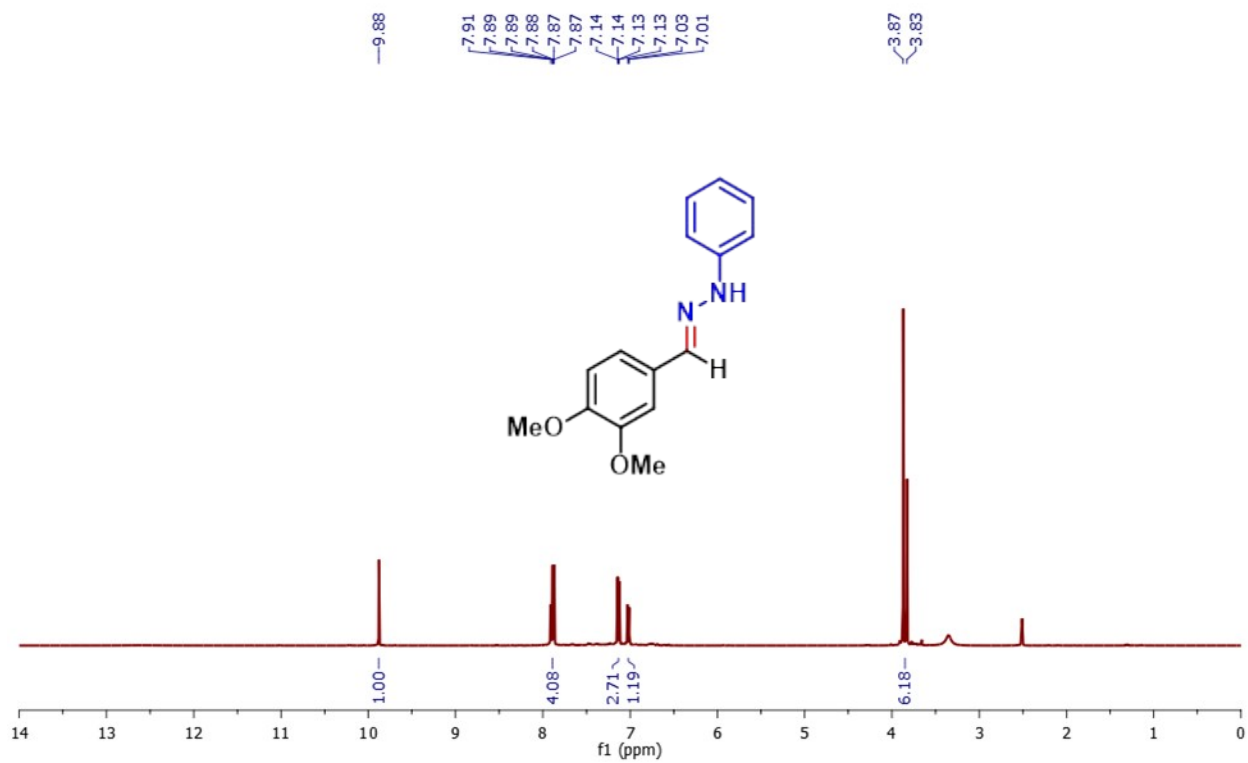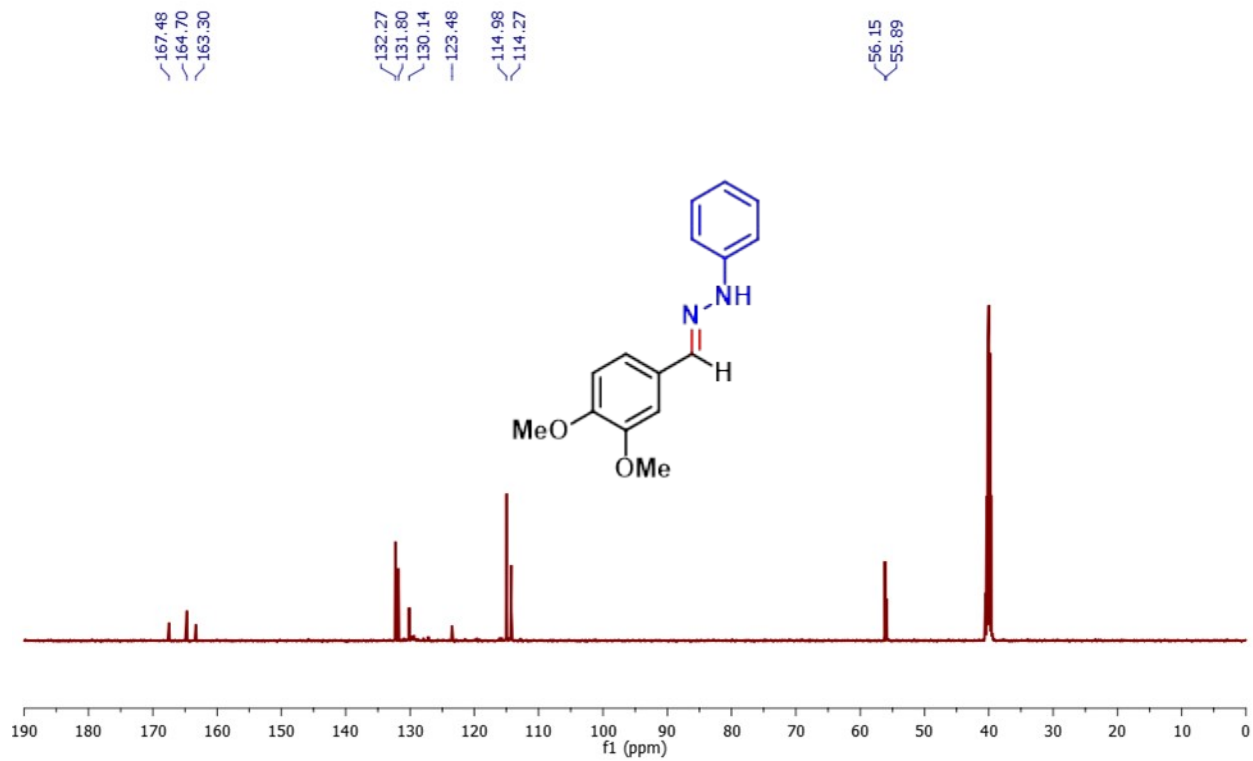

### 1-(4-methoxybenzylidene)-2-phenylhydrazine (6j)

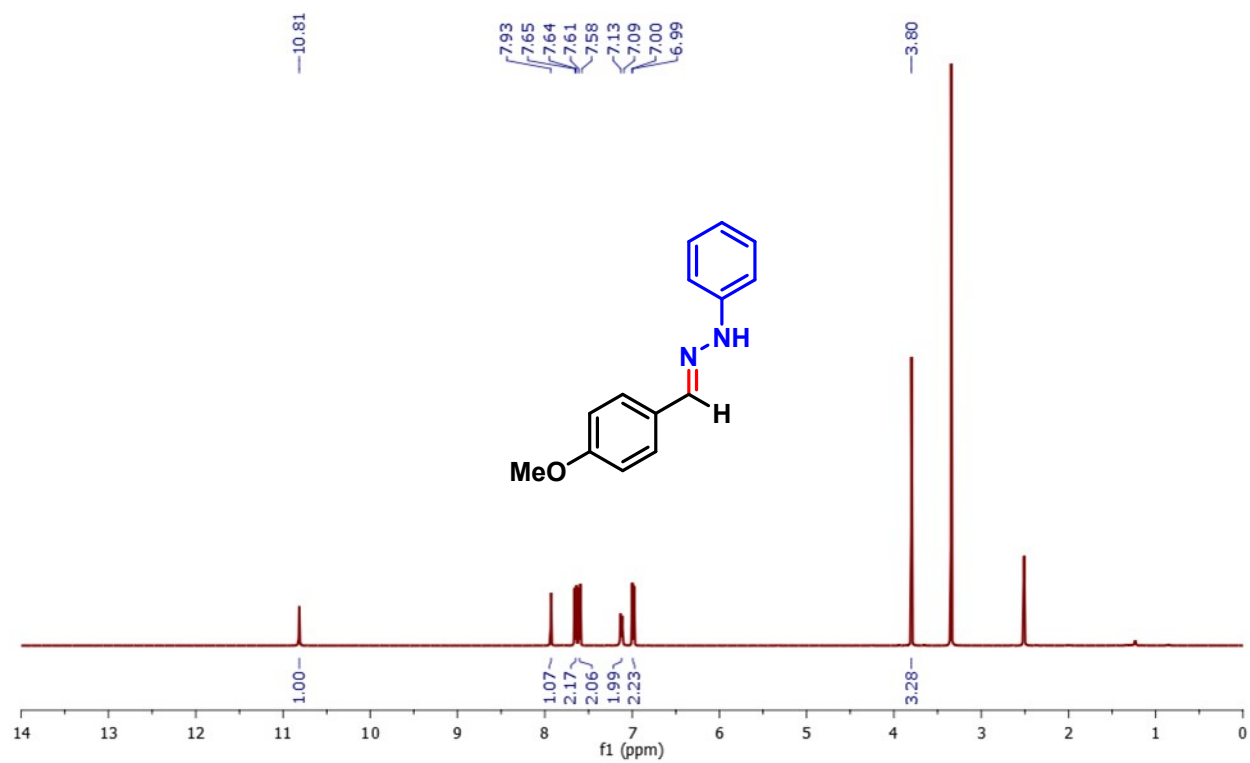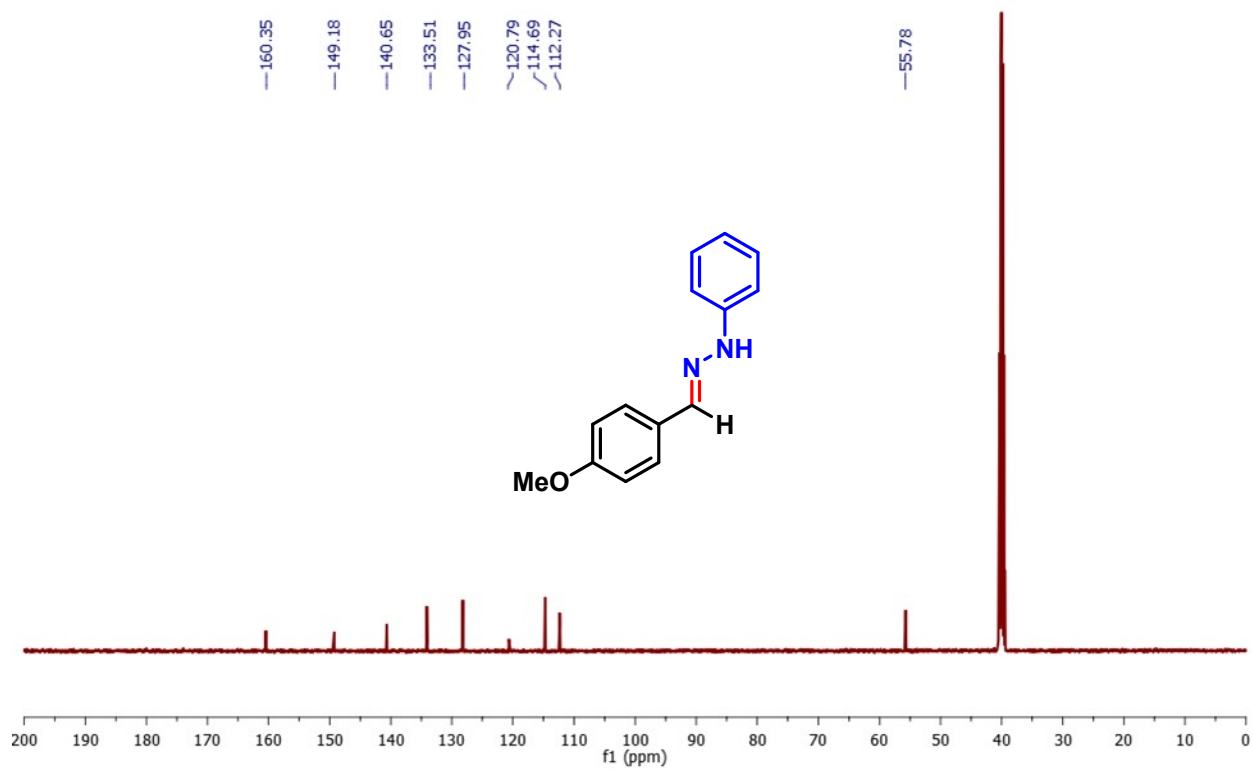

### 4-(2-(4-methoxybenzylidene)hydrazineyl)benzonitrile (6k)

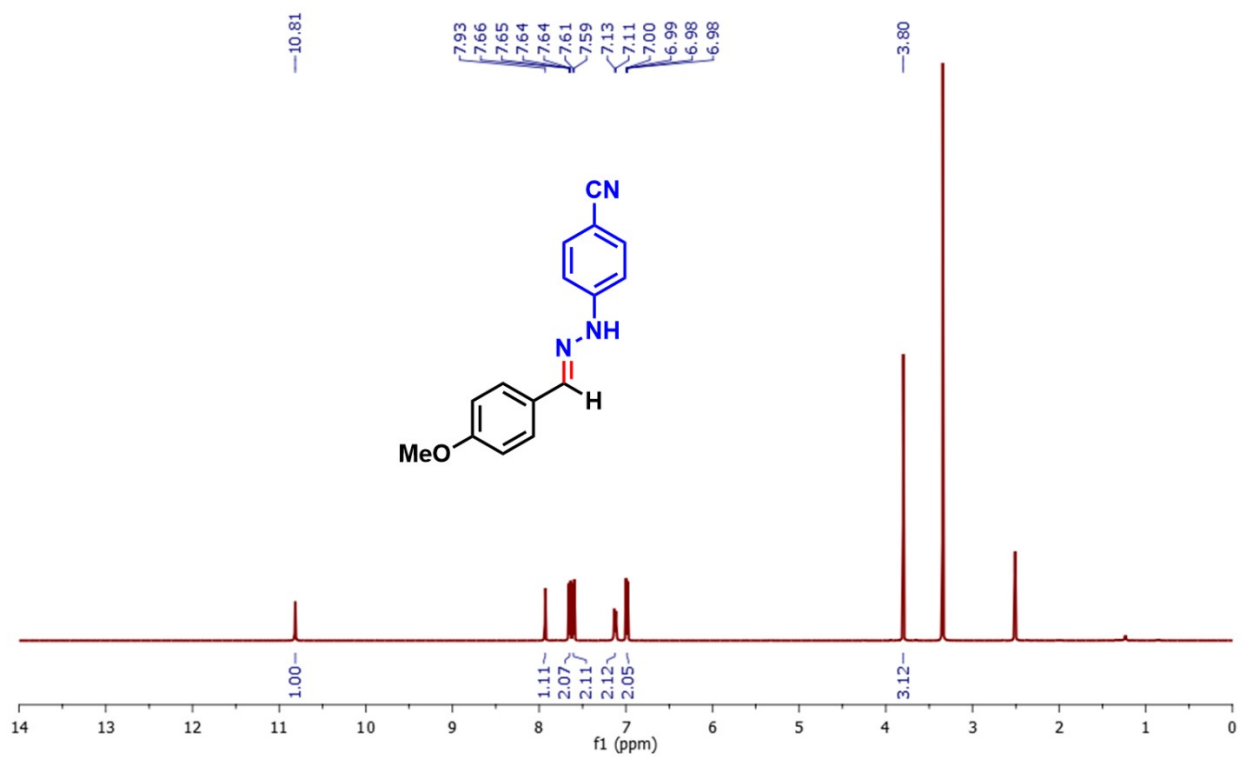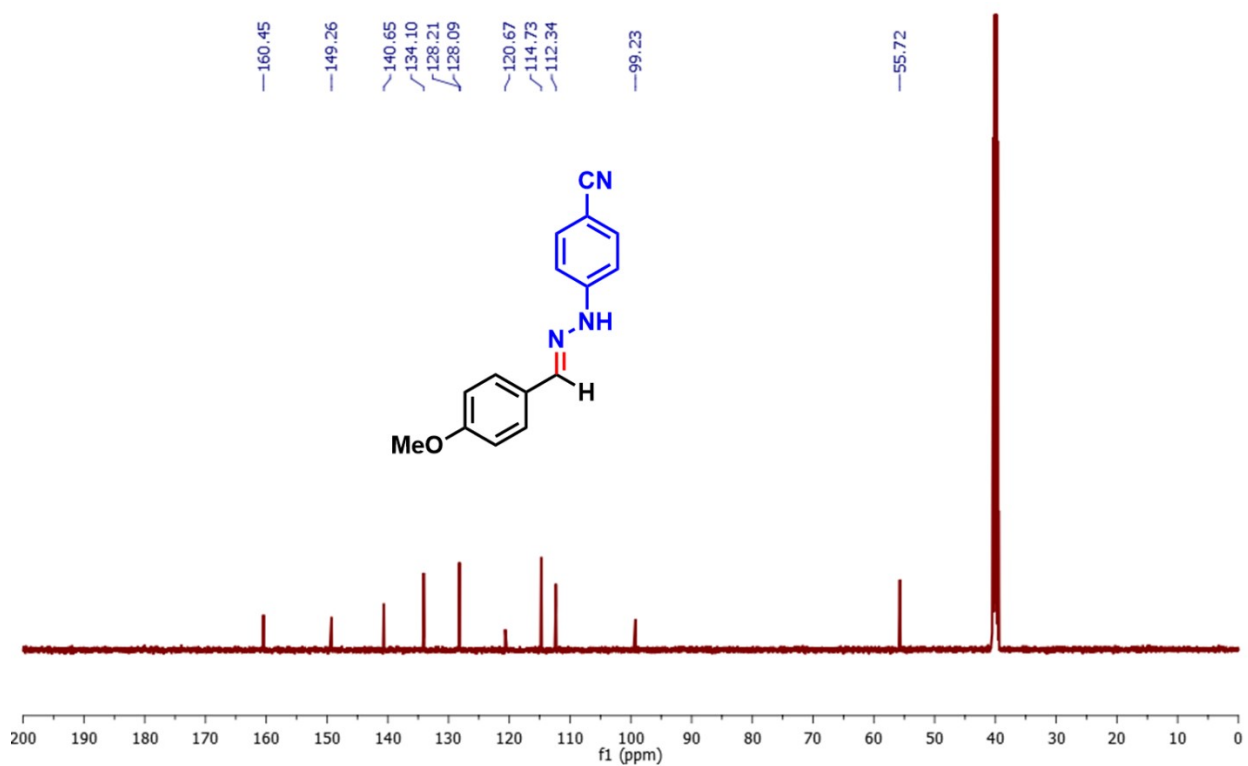

### 4-(2-(4-nitrobenzylidene)hydrazineyl)benzonitrile (6l)

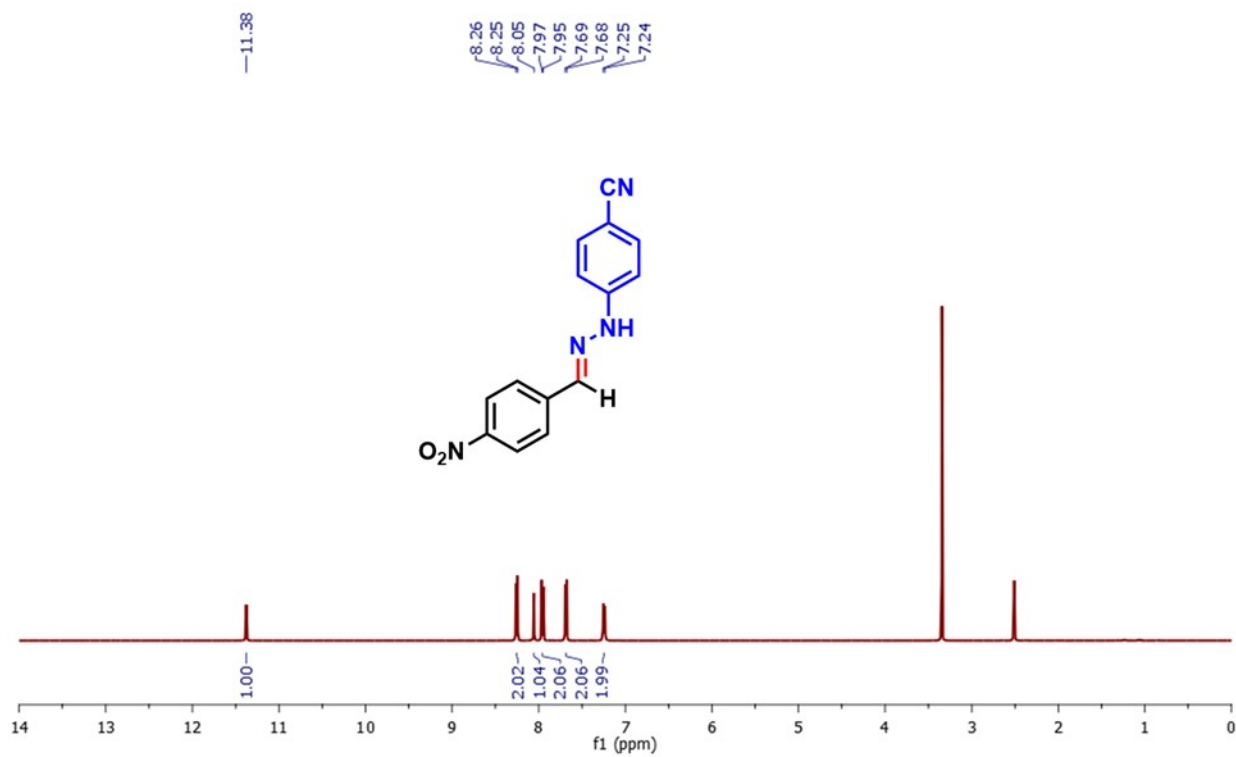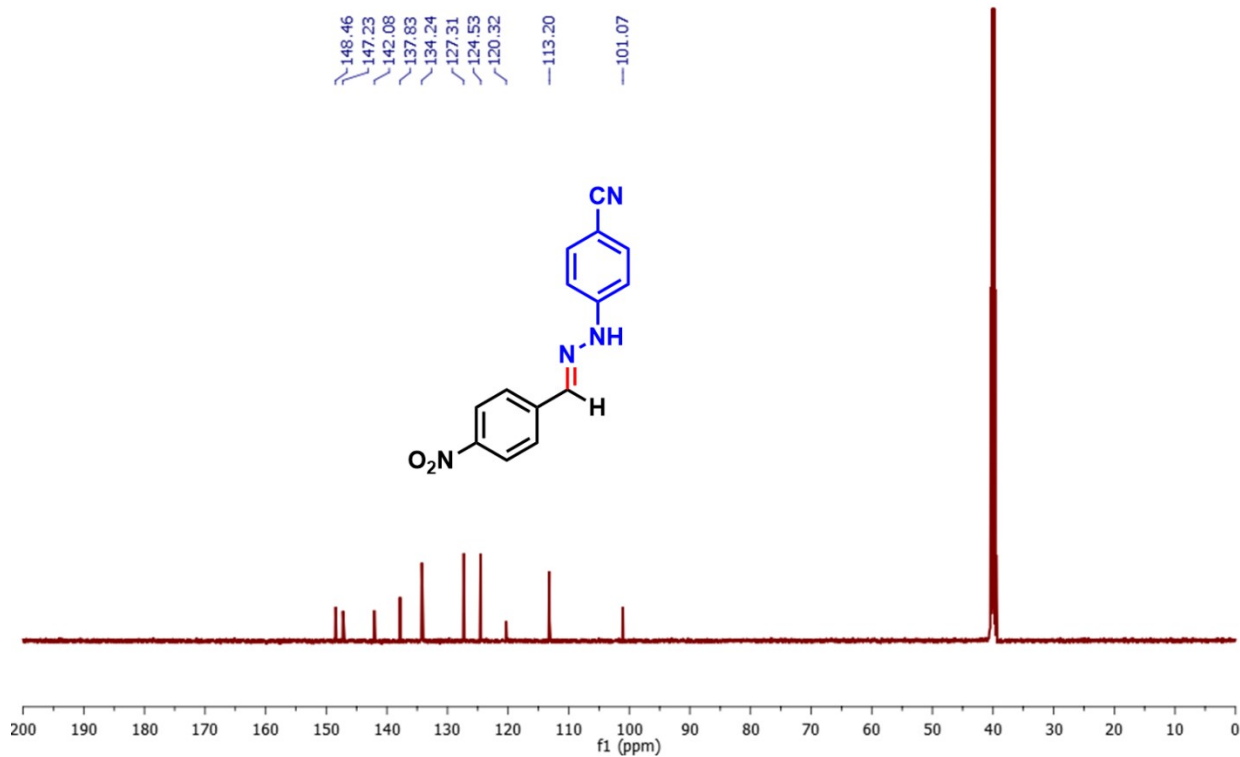

# 1-benzylidene-2-(2-chlorophenyl)hydrazine (6m)

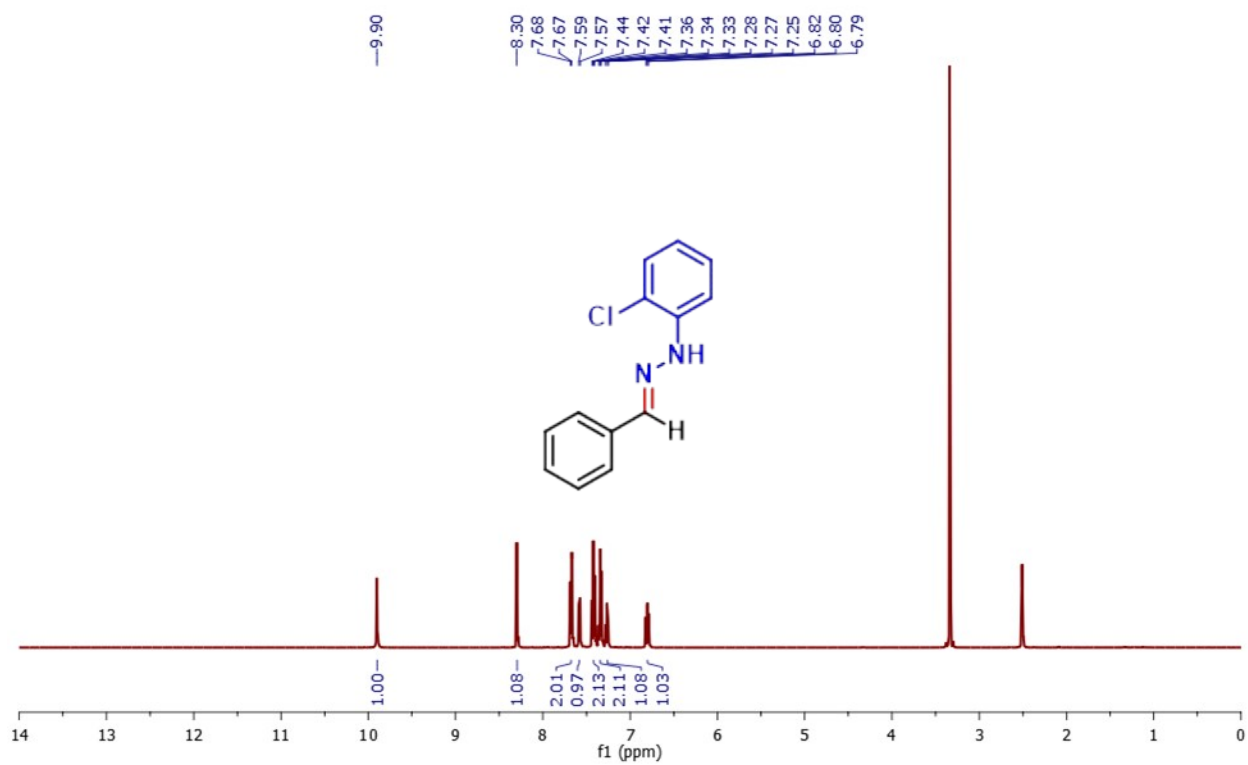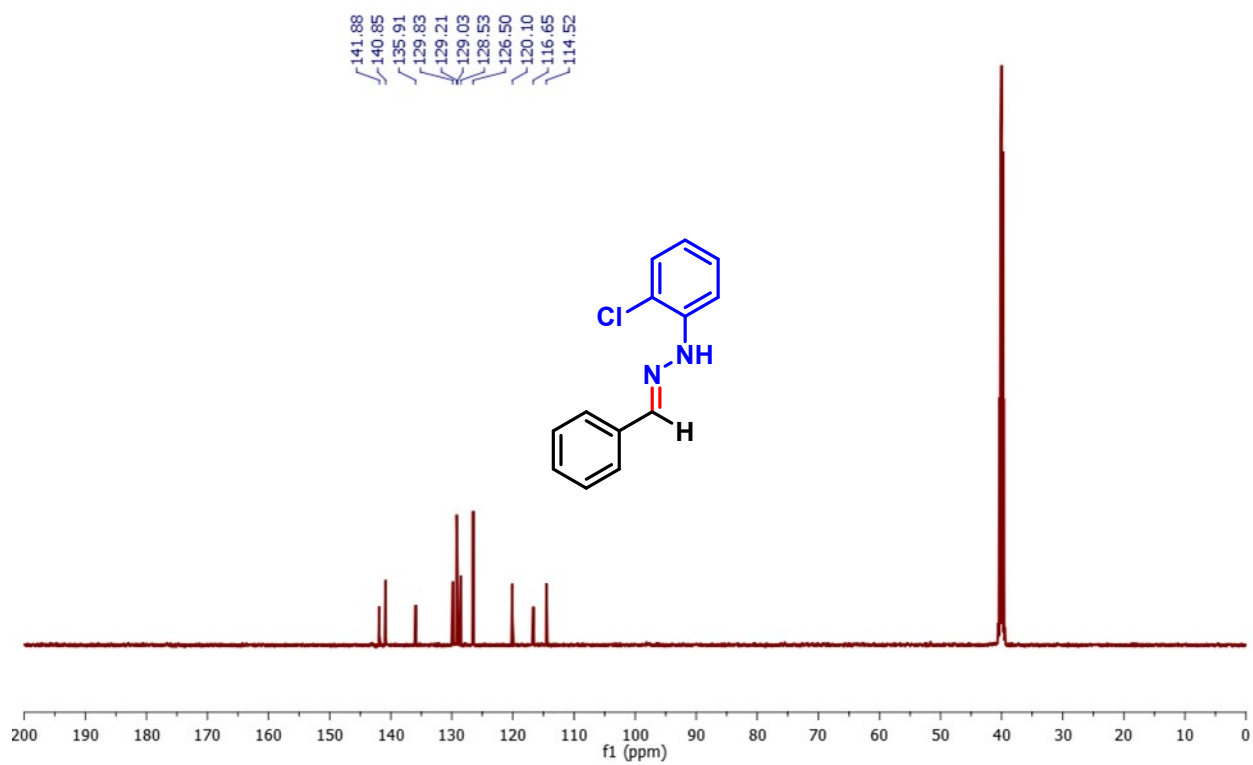

# 1-benzylidene-2-(4-chlorophenyl)hydrazine (6n)

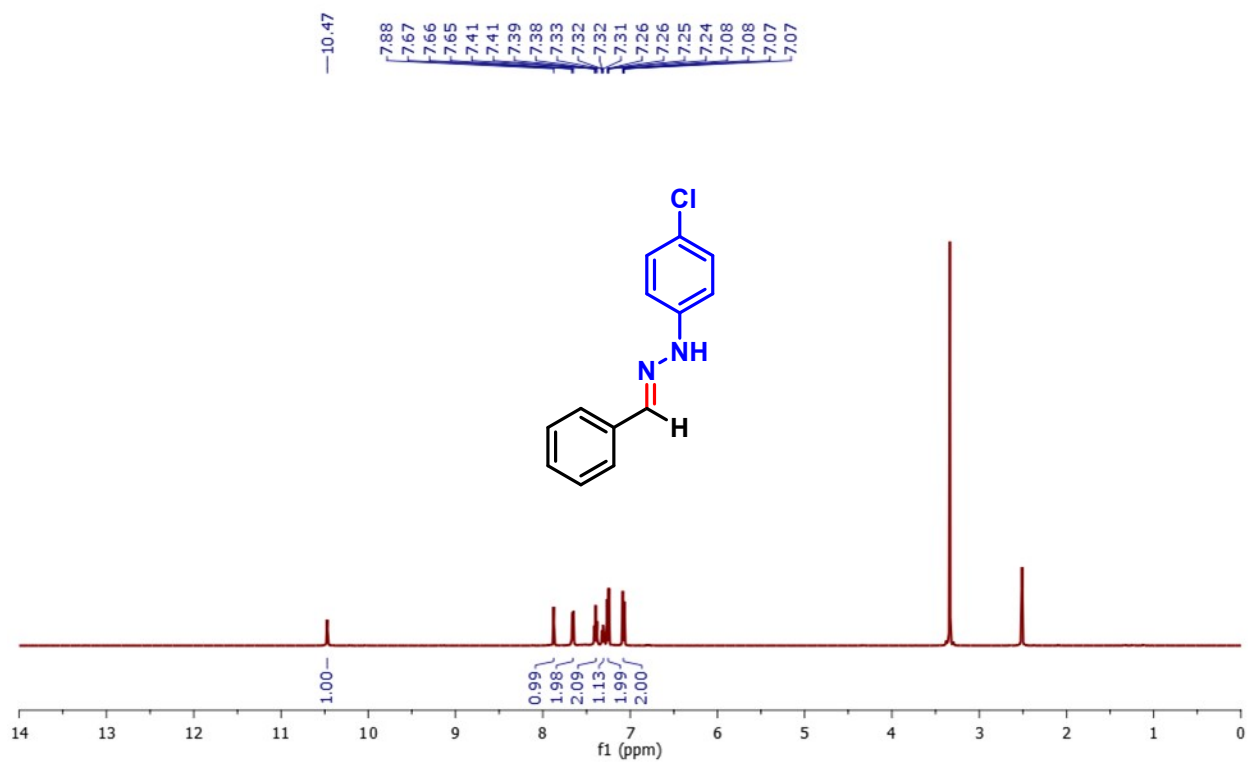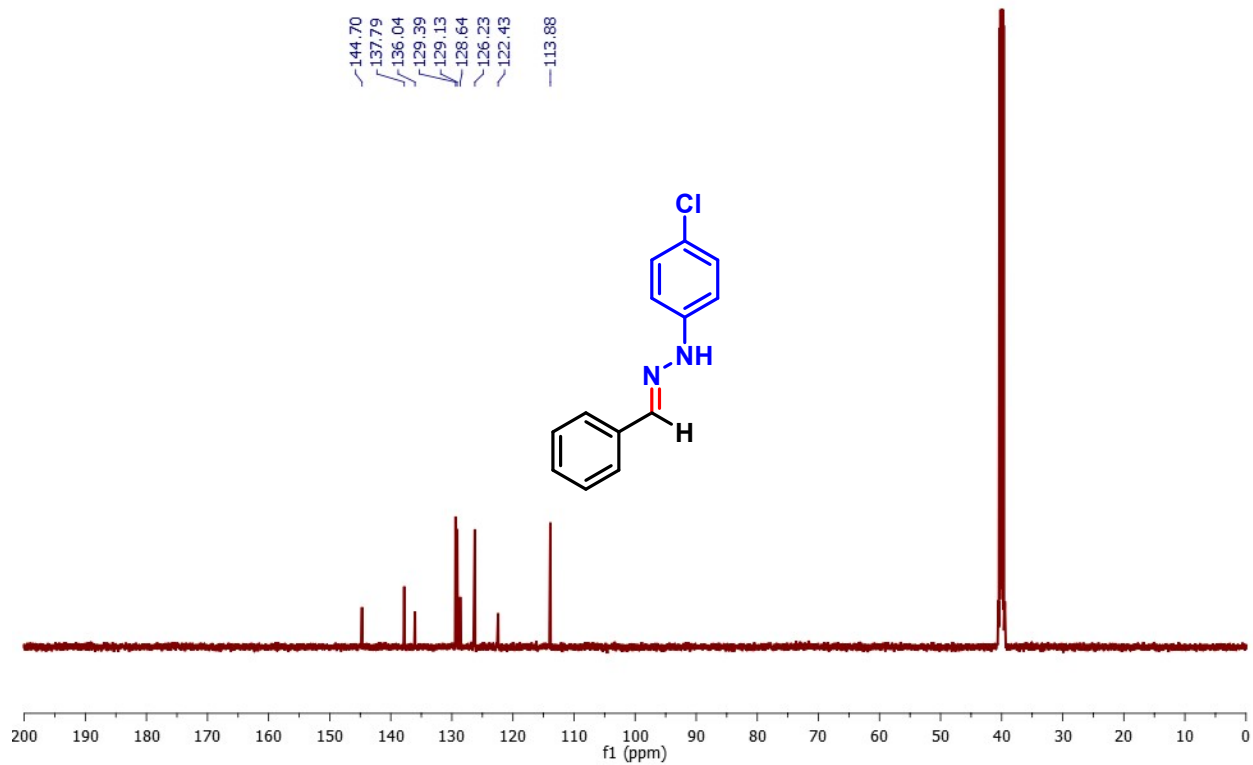



# 1-benzylidene-2-(2,4-dichlorophenyl)hydrazine (6o)

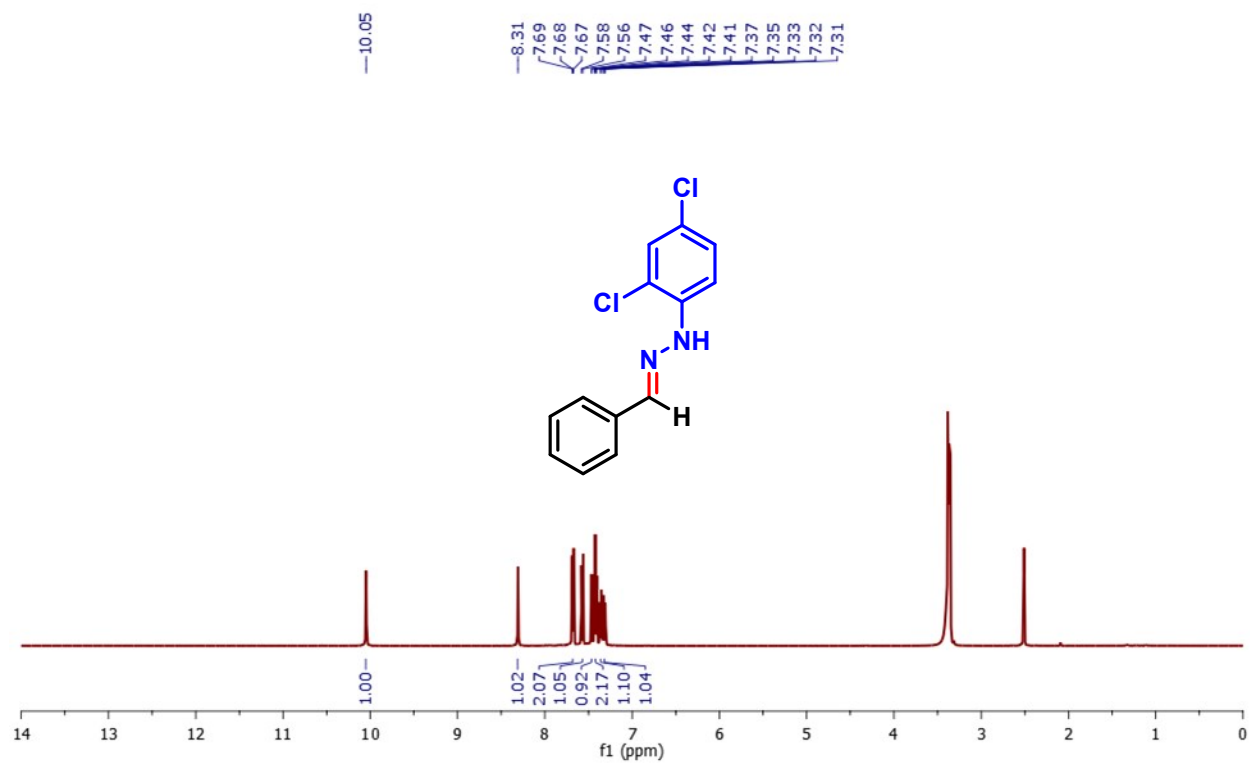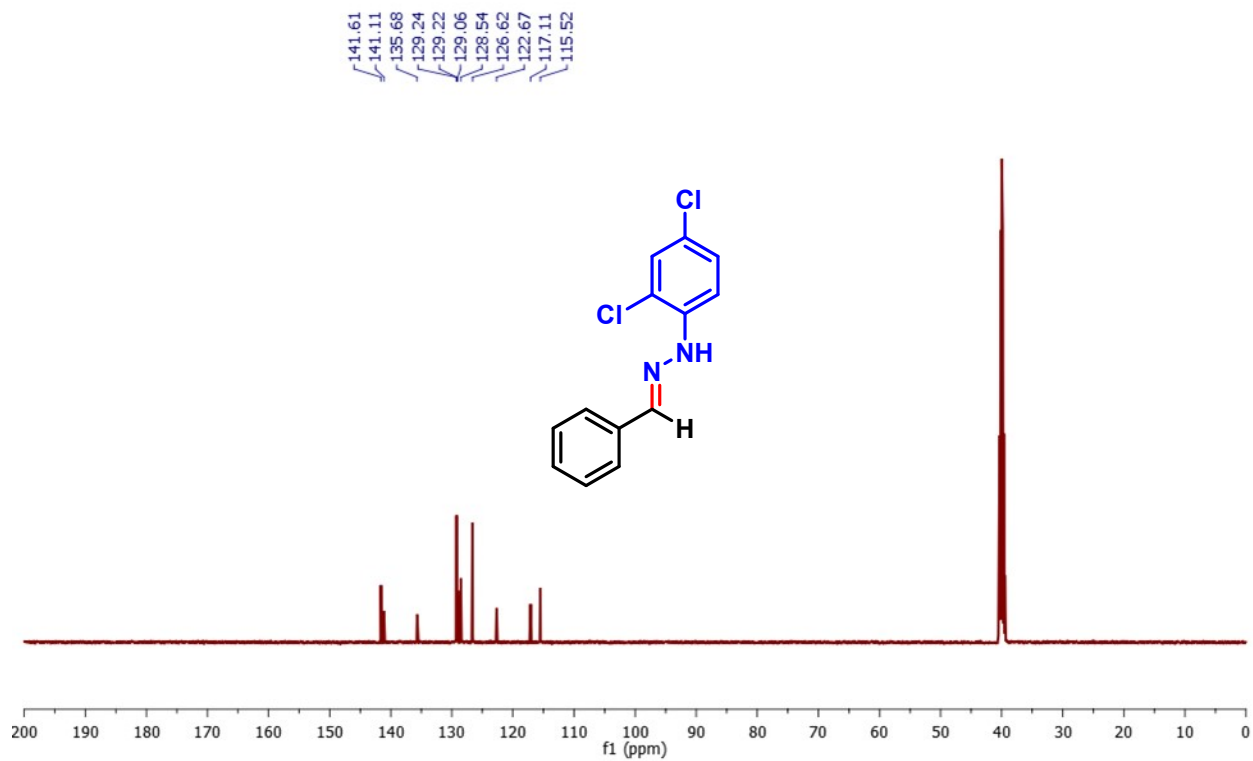

# 1-benzylidene-2-(2-bromophenyl)hydrazine (6p)

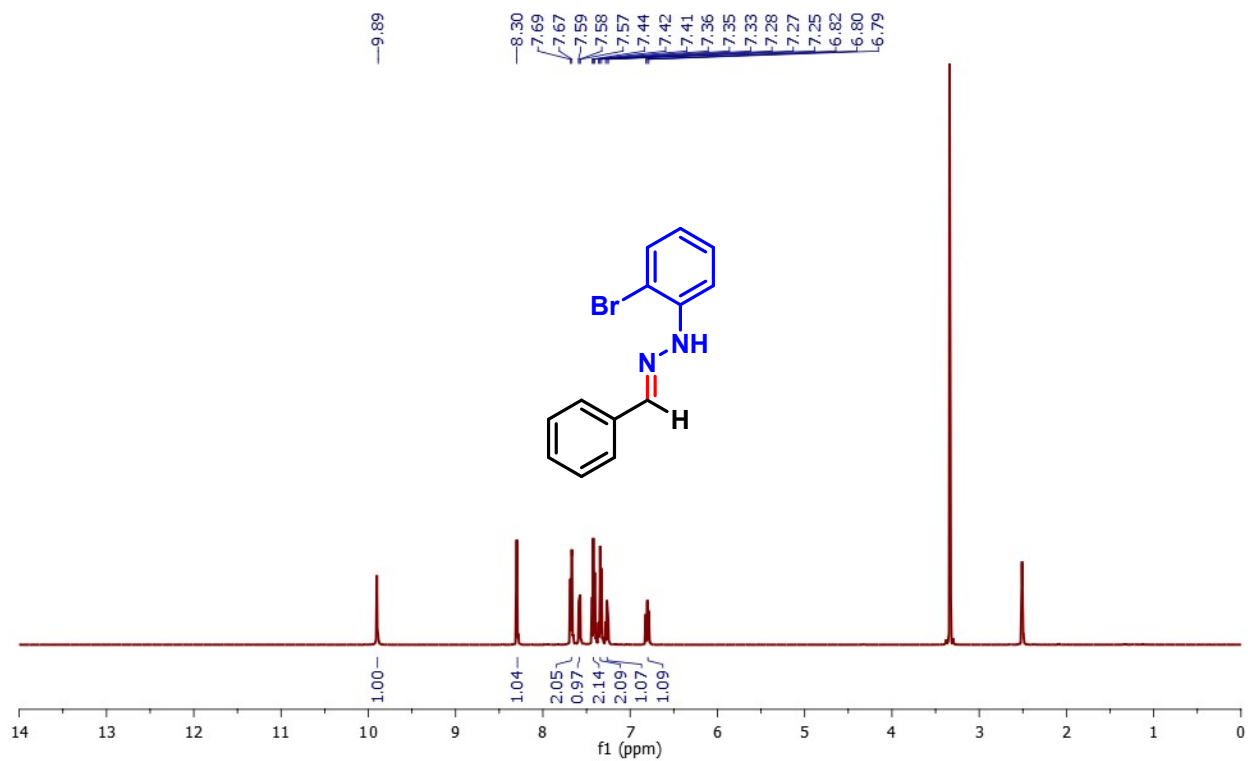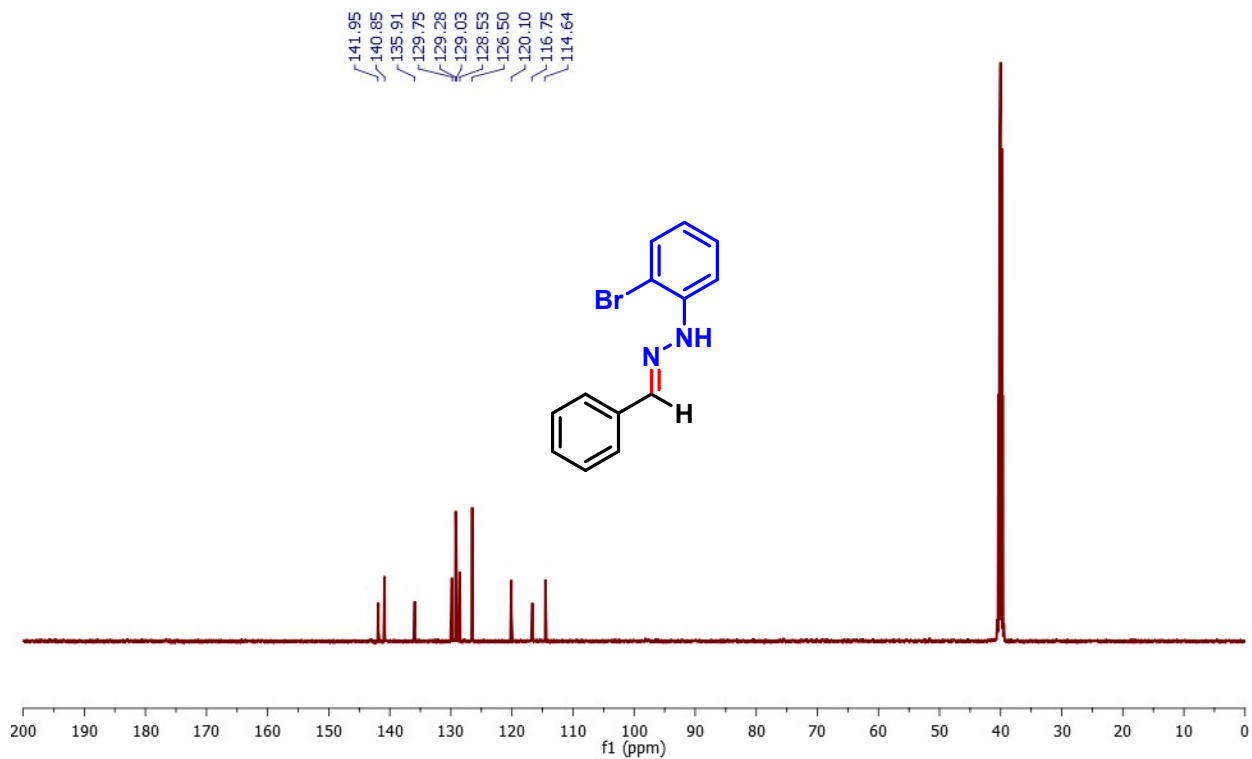

# 1-benzylidene-2-(4-bromophenyl)hydrazine (6q)

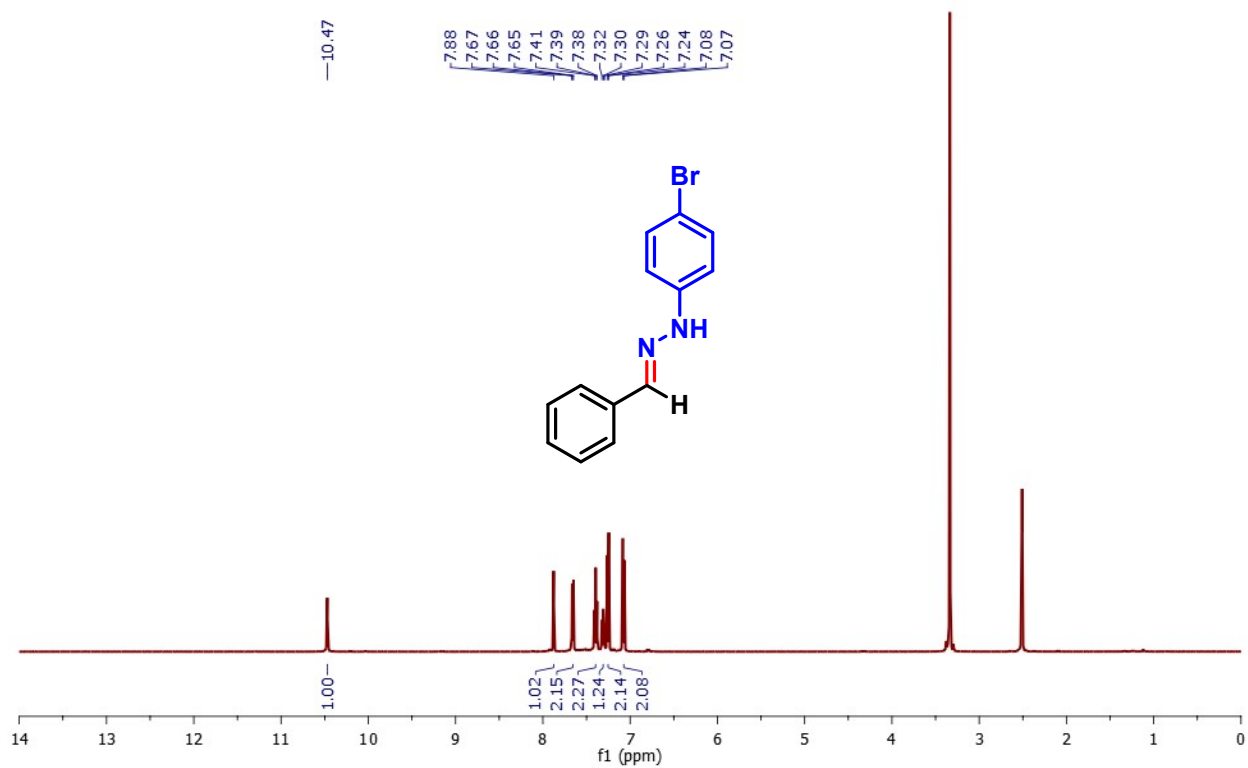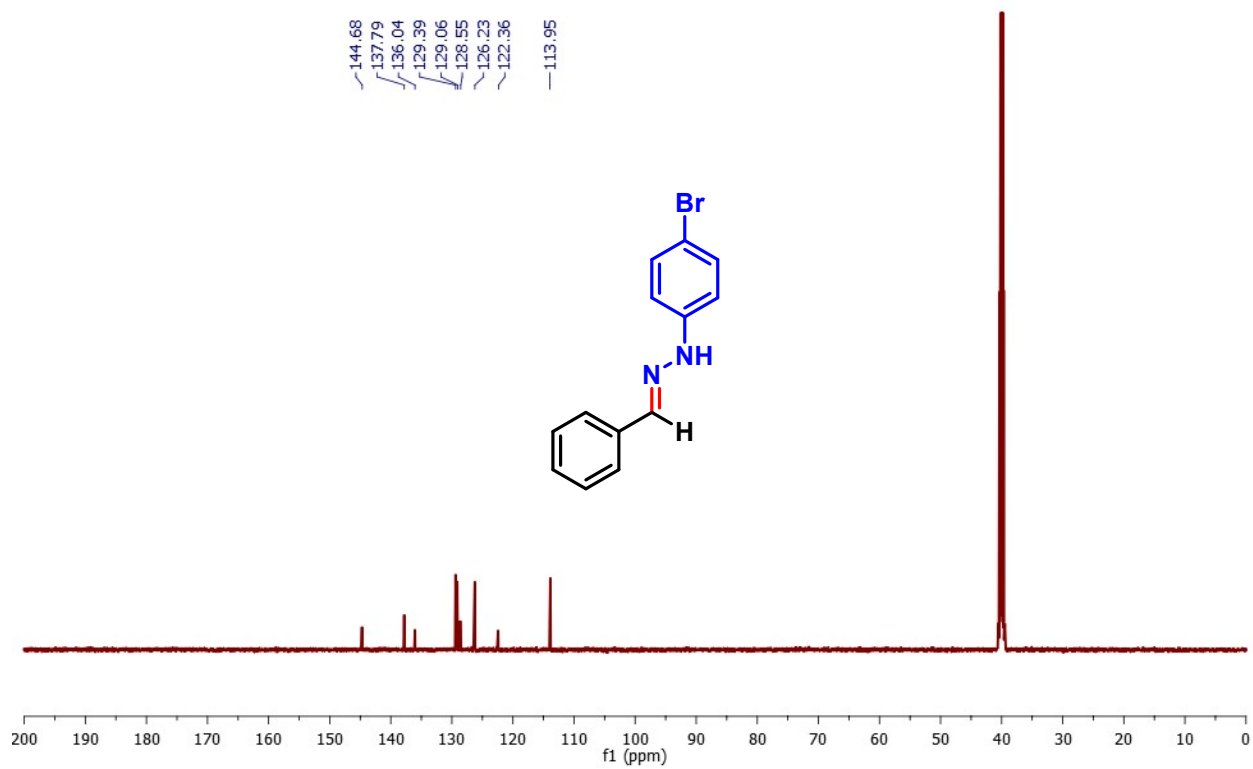

# 1-benzylidene-2-(2,4-dibromophenyl)hydrazine (6r)

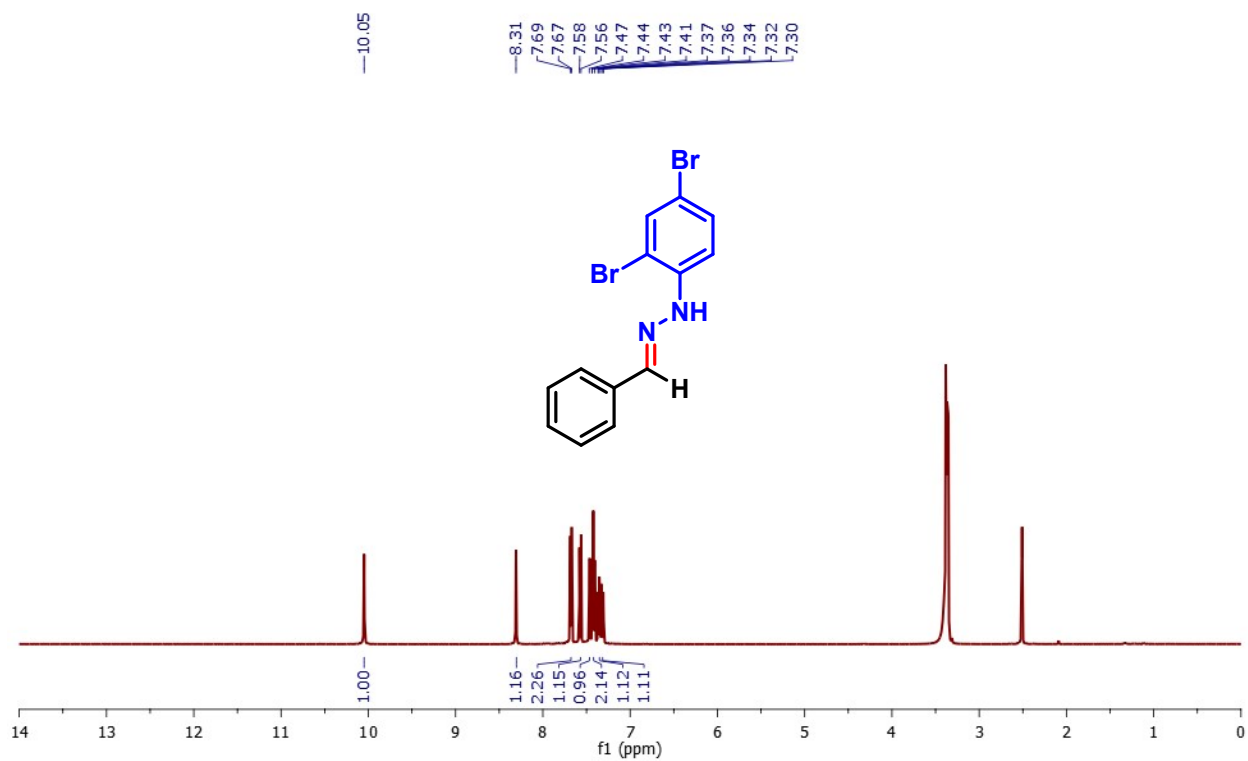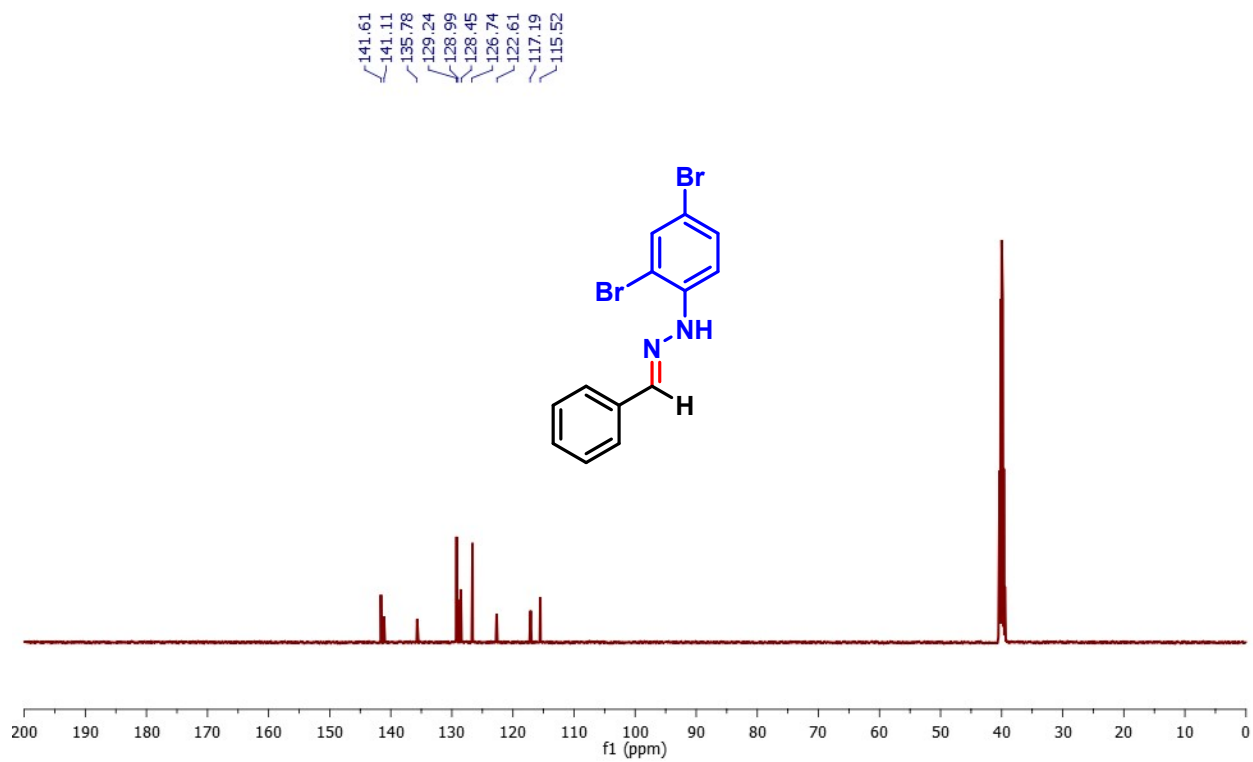

# 1-benzylidene-2-(2,4-dimethylphenyl)hydrazine (6s)

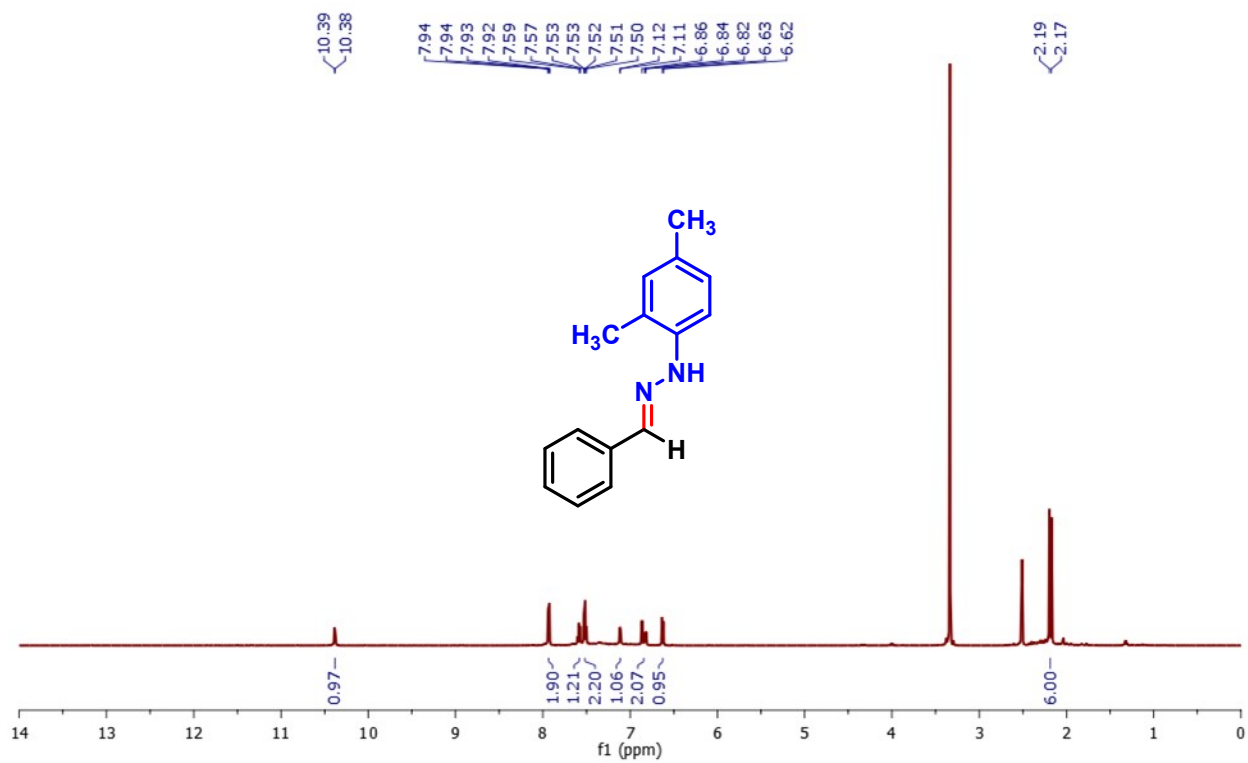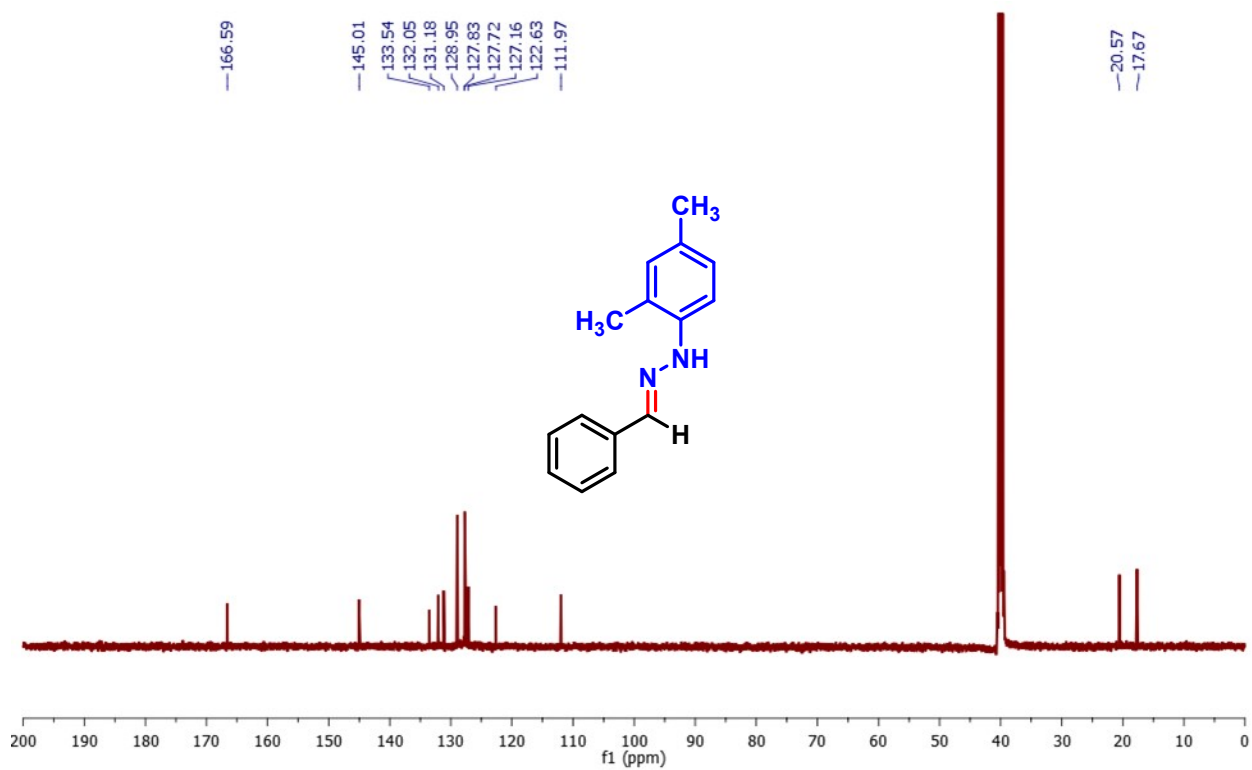

# 1-benzylidene-2-(4-fluorophenyl)hydrazine(6t)

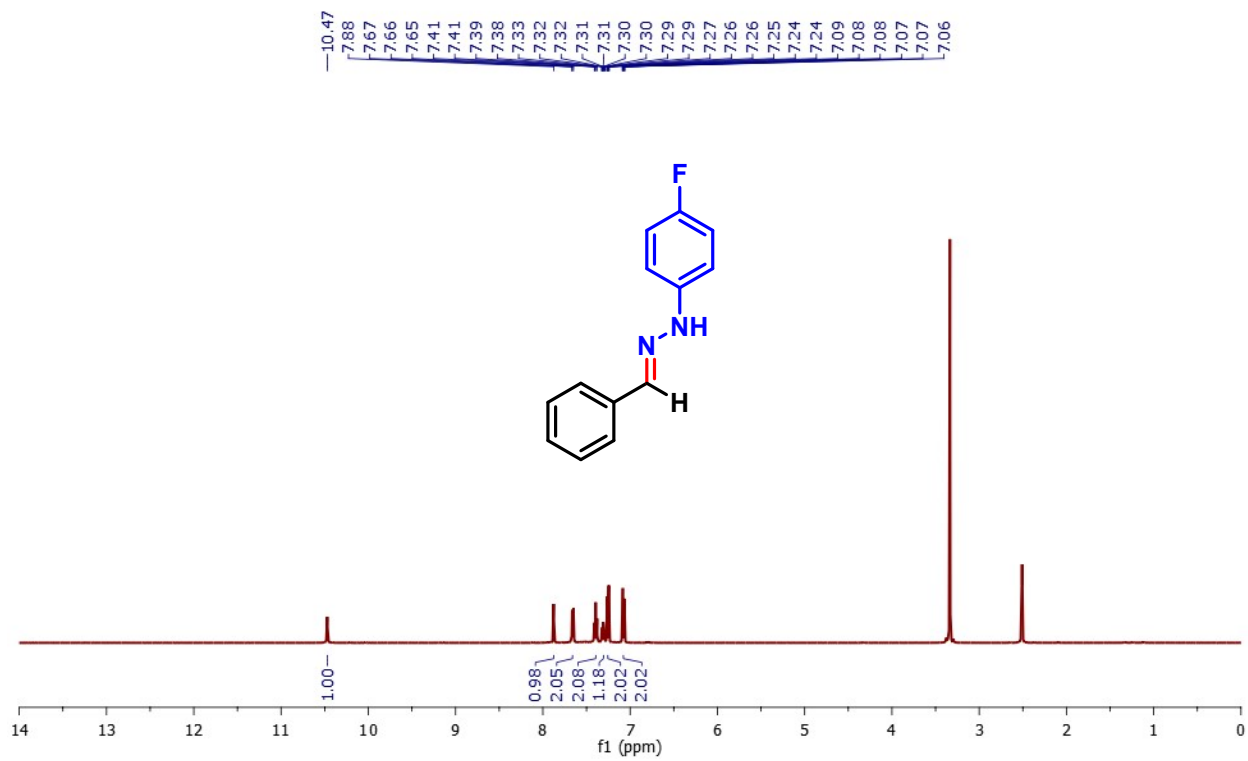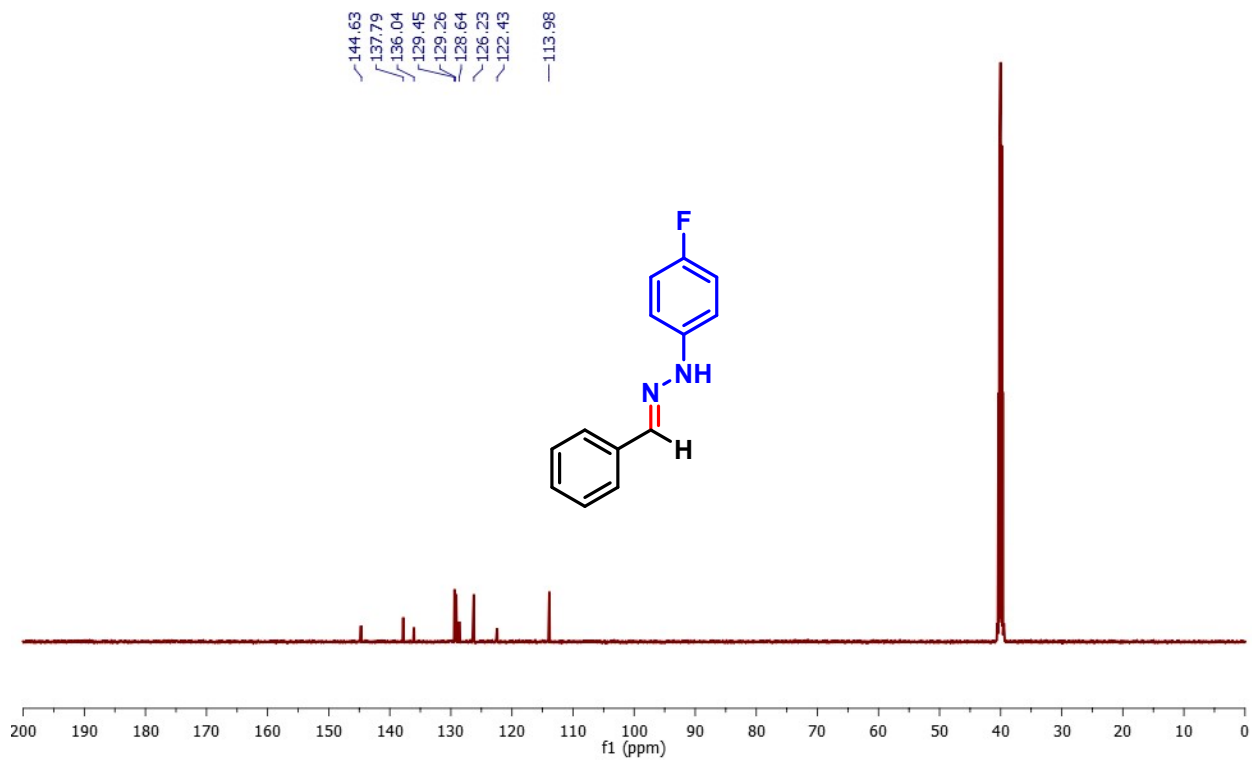

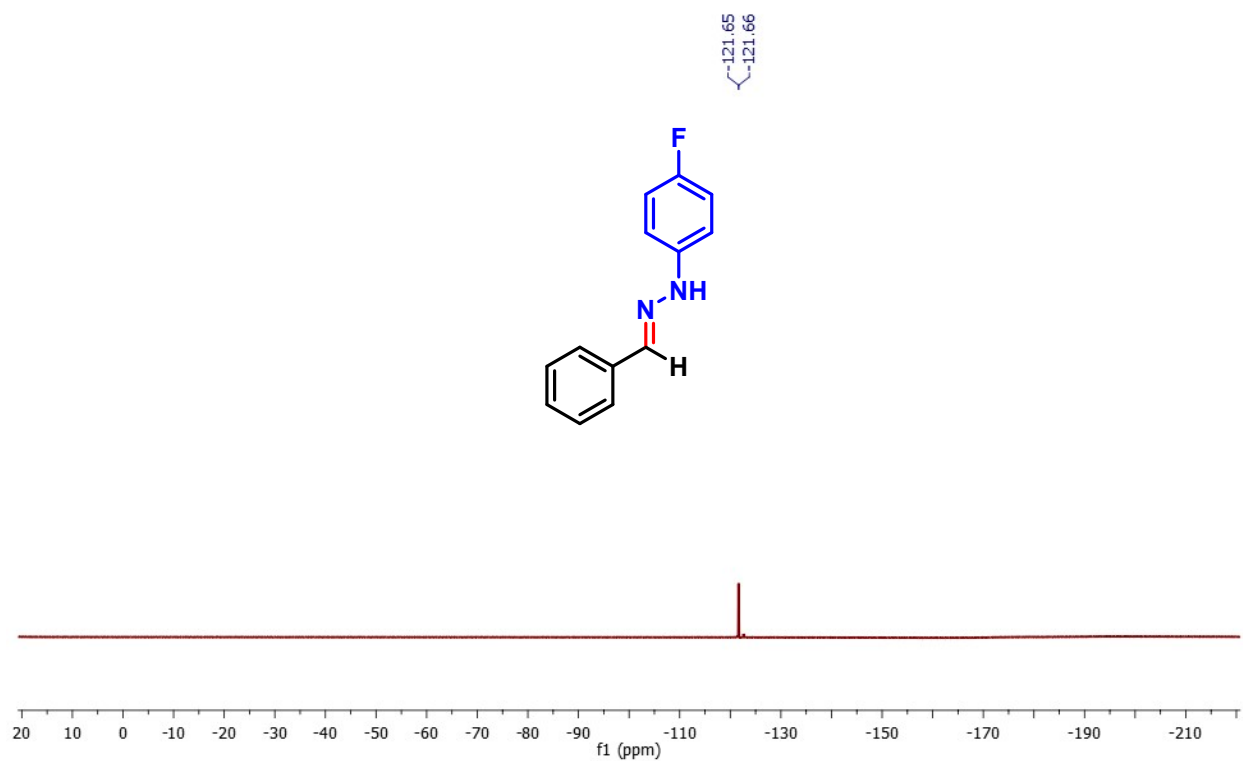

**1-(naphthalen-1-ylmethylene)-2-phenylhydrazine (6u)**

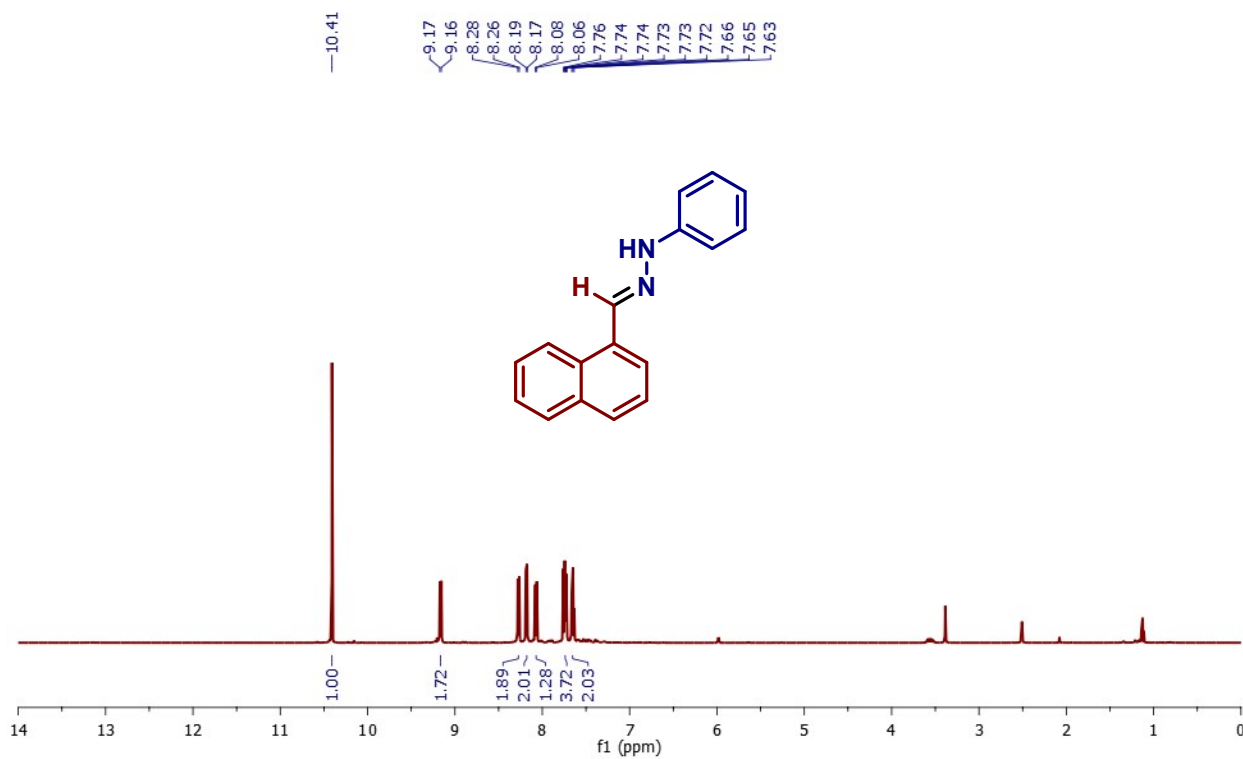

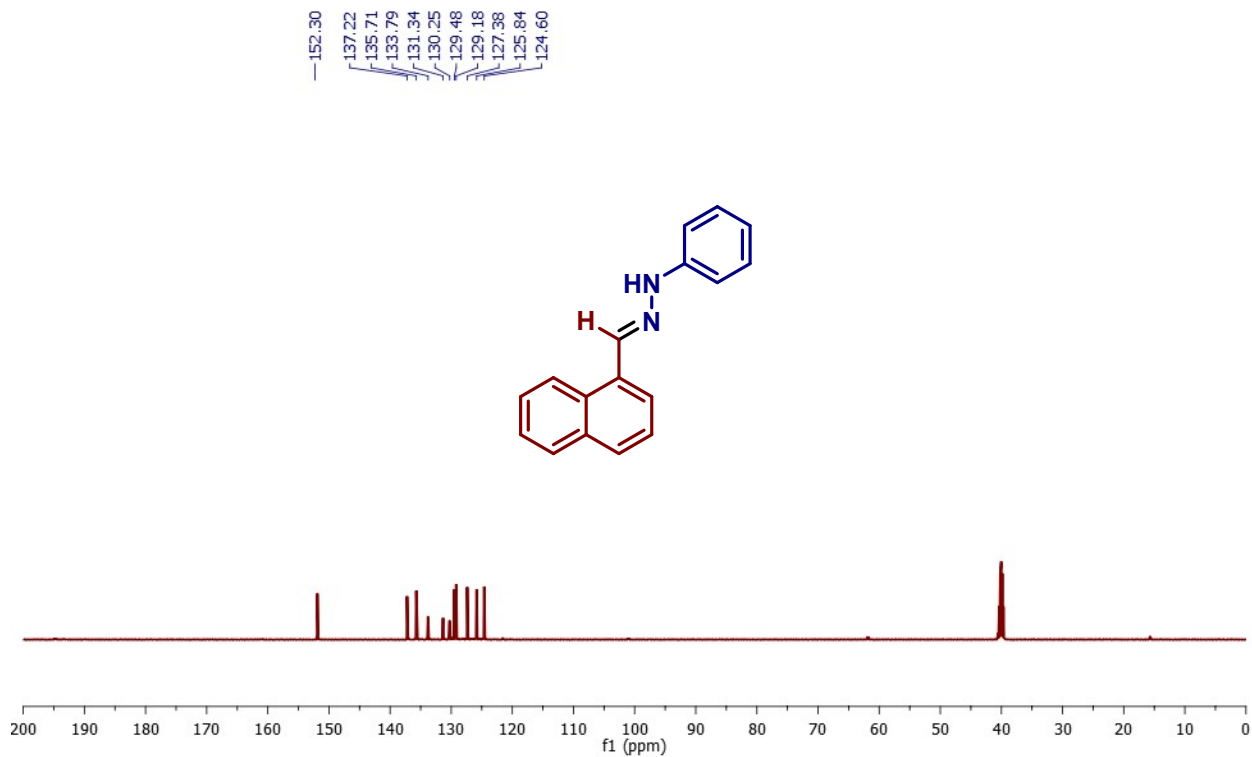

**1-phenyl-2-(thiophen-2-ylmethylene)hydrazine(6v)**

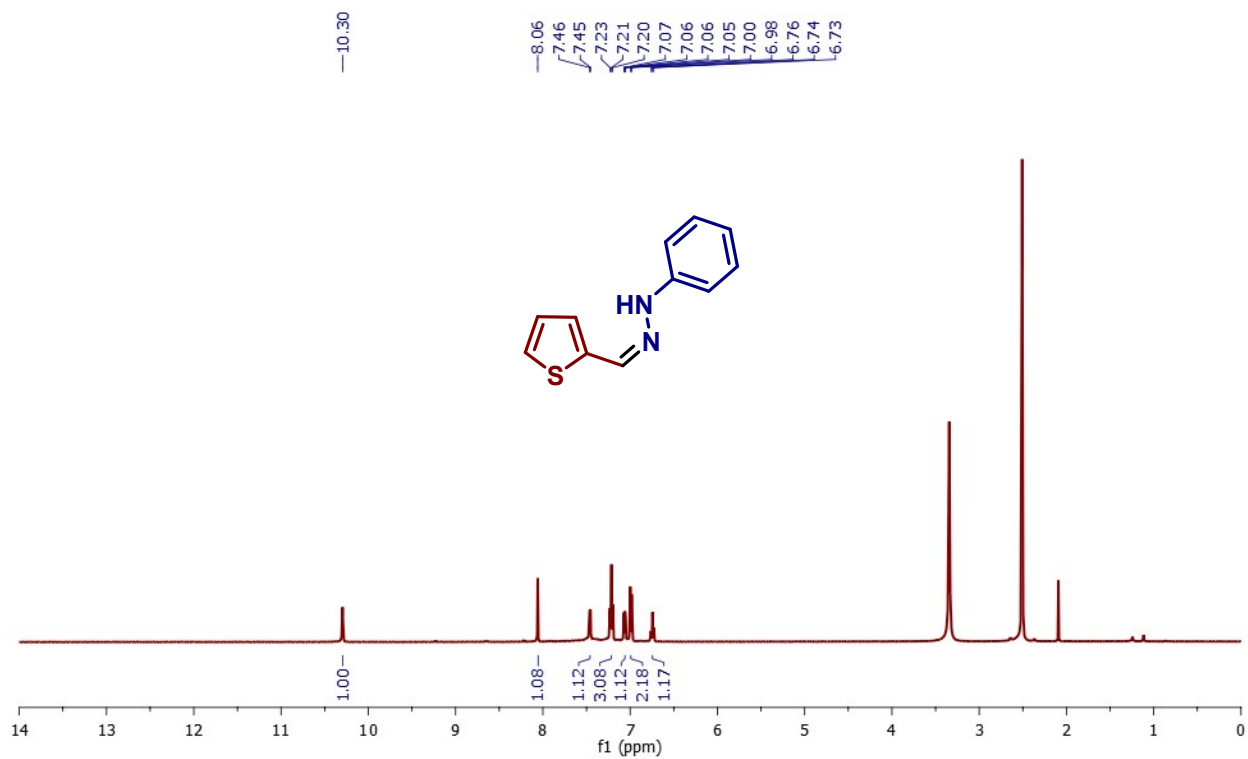



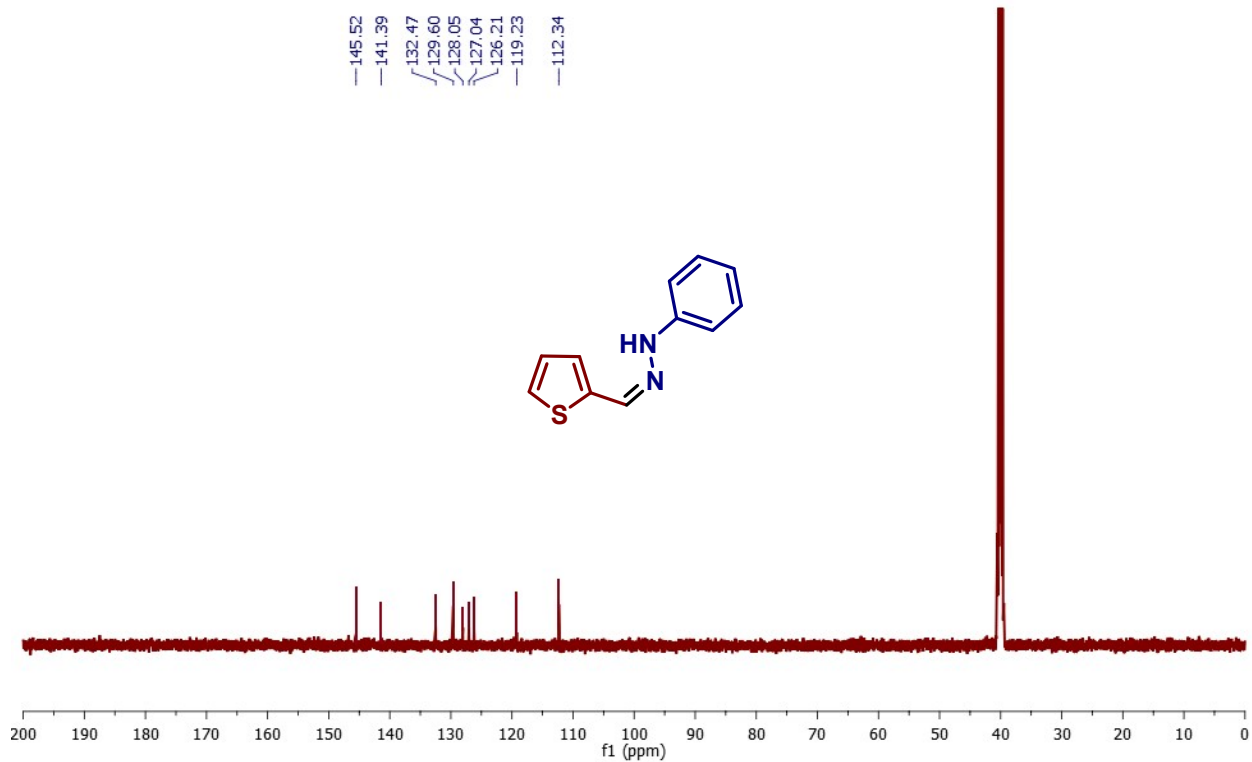

2-(2-benzylidenehydrazineyl)benzo[d]thiazole (6w)

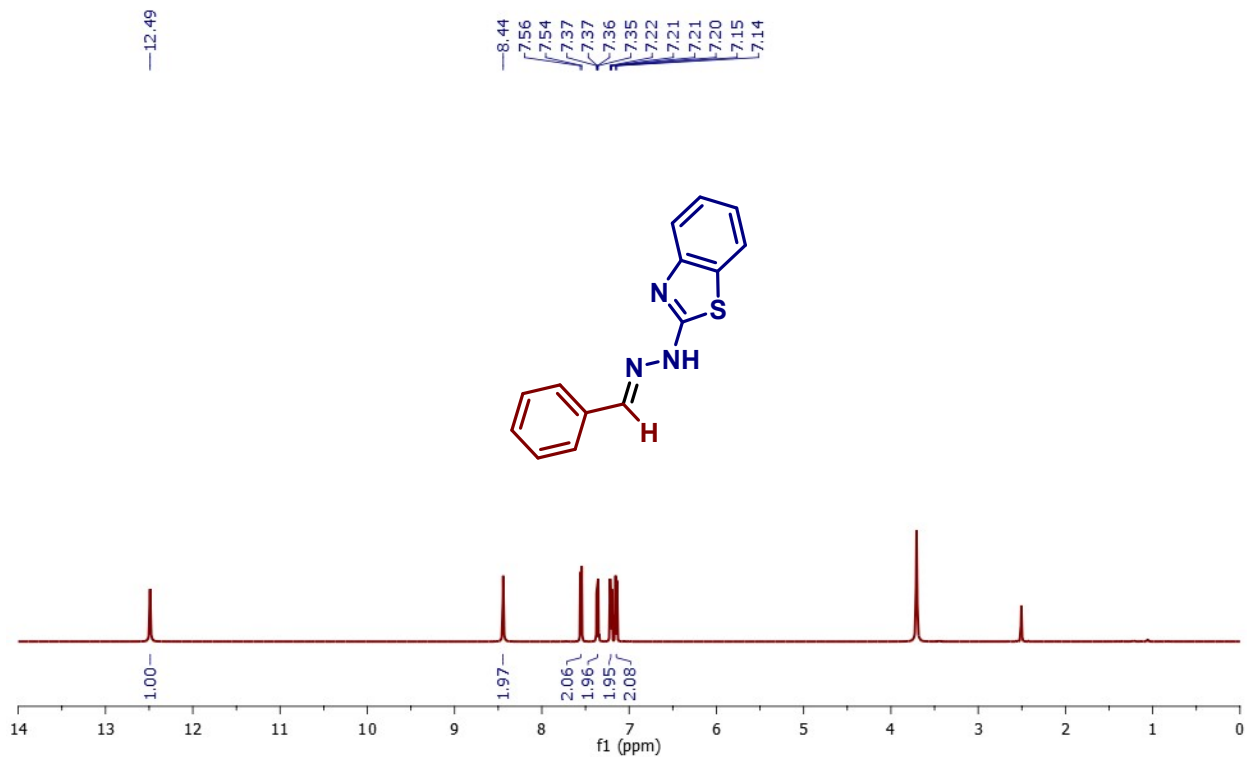

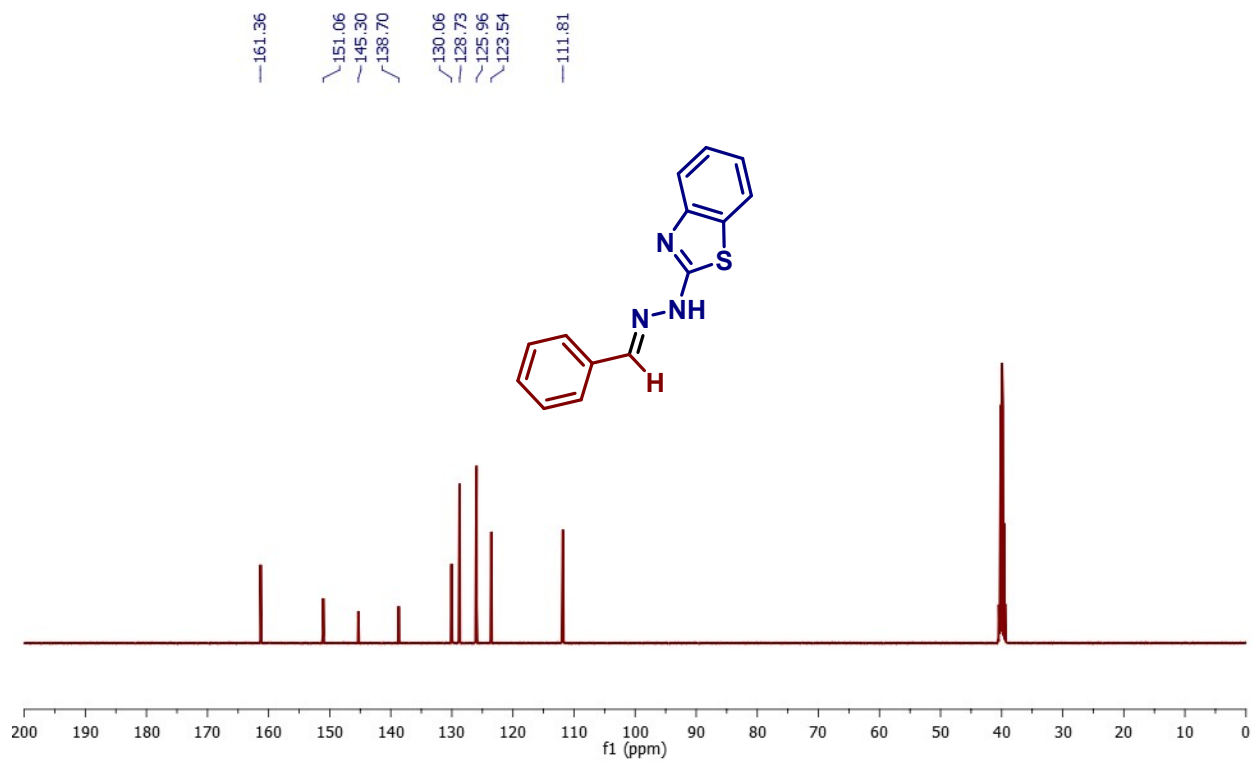

### Intermediate E (benzaldehyde)

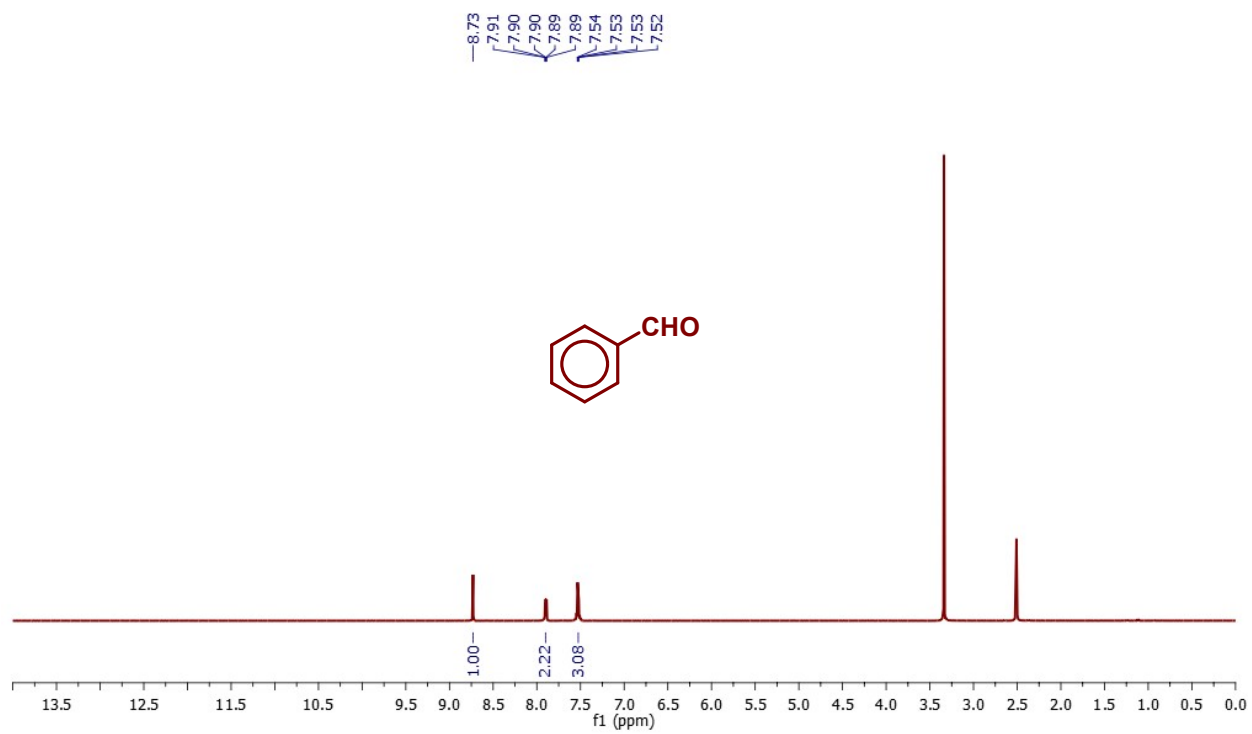

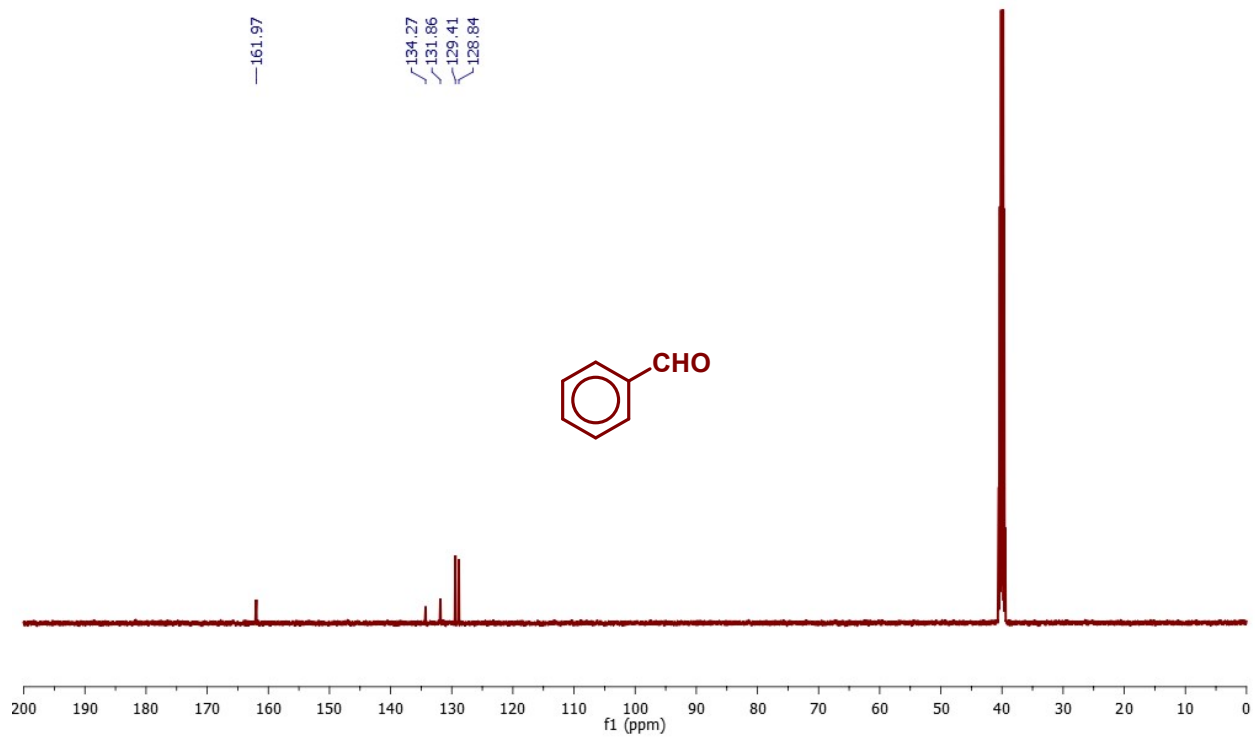

### Intermediate VI (indoline-2,3-dione)

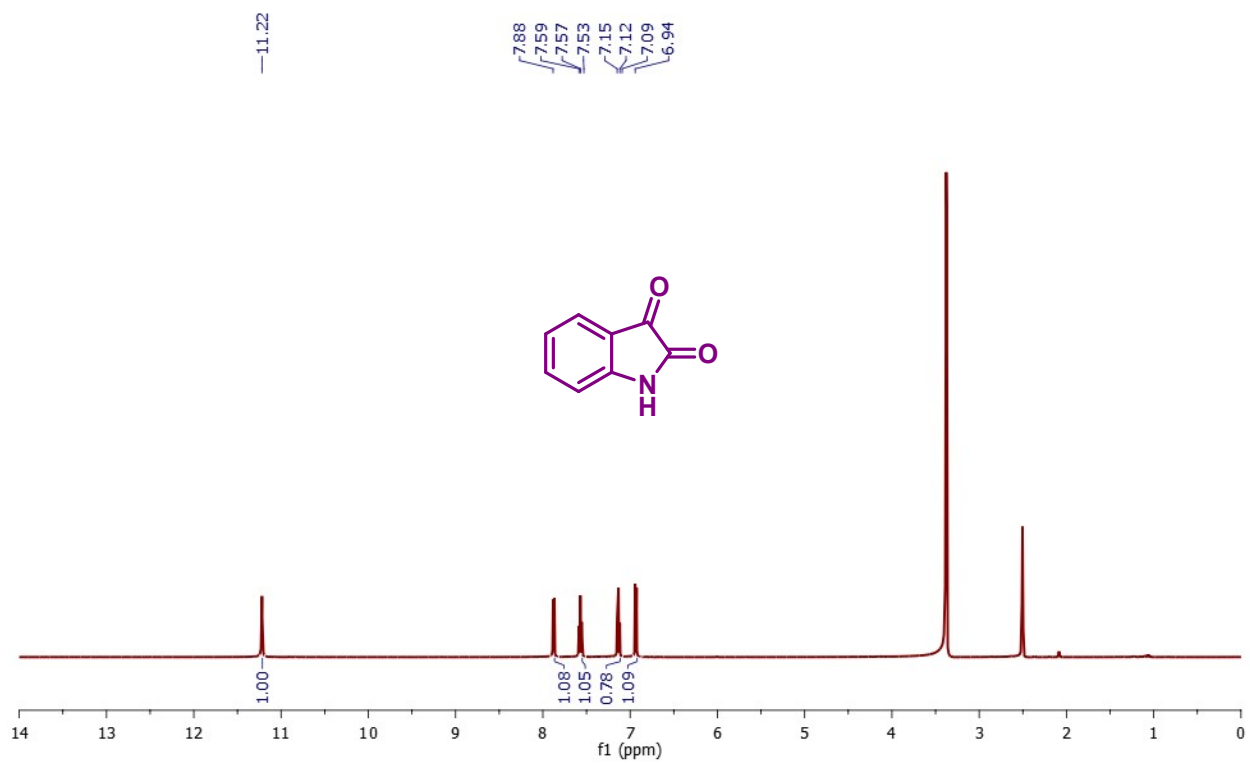

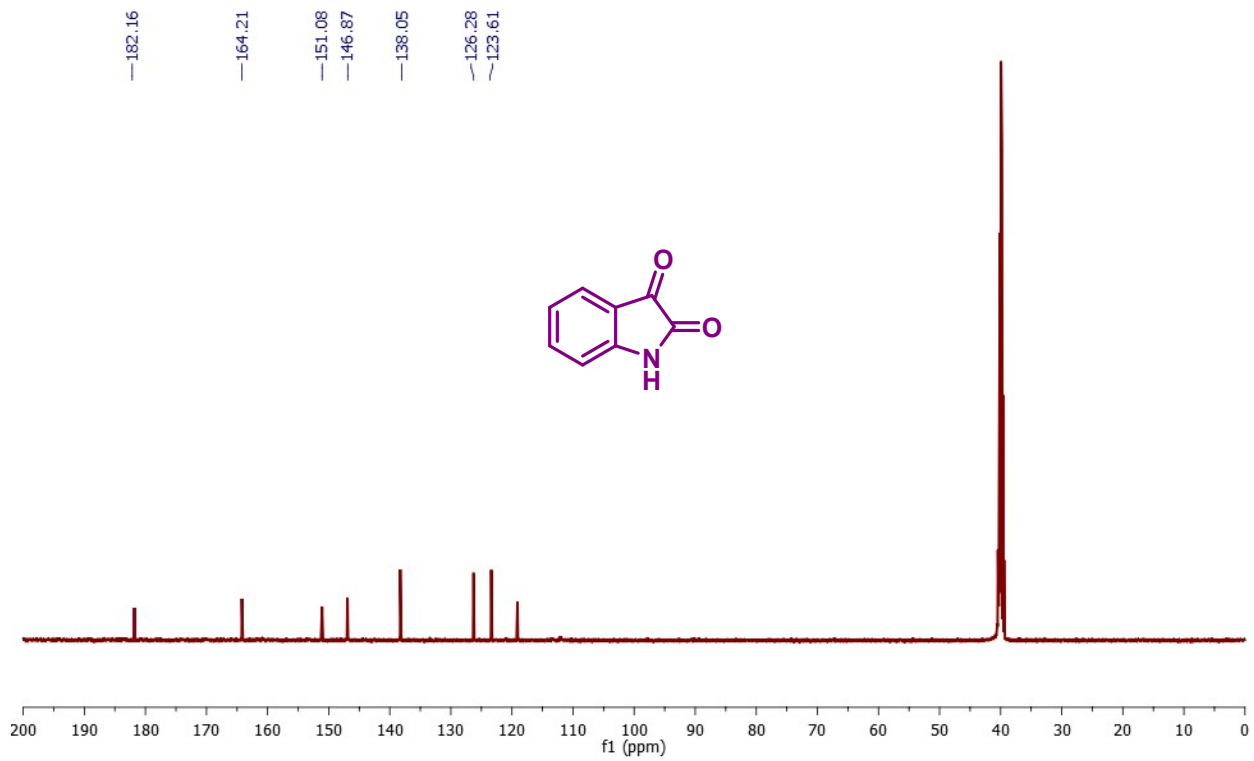

## 5. Optimization

In the initial investigation, the visible-light photoredox C(sp<sup>2</sup>)-H functionalization of Indole (1a) with Phenylhydrazine (2a) was selected as the model reactant to optimize the reaction conditions under blue LED irradiation in ambient air at room temperature (**Table 1**). Firstly we investigated the role of various photocatalysts (**Table 1, entries 1-4**) using ethanol as a solvent.

We found that Eosin Y was the most active catalyst giving product 3a in 42% yields (**Table 1, entry 4**). Next, a variety of solvents were optimized (**Table 1, entries 5-11**), and water gave a good yield of 45% (**Table 1, entry 11**). In our favor, the reaction yield was accelerated to 68% using a mixture of Ethanol and Water in a ratio of 1:1 (**Table 1, entry 12**). Encouraged by the finding, a different ratio of Ethanol and Water (**Table 1, entries 12-15**) was tried. We got the best result (88%) using a mixture in the ratio of 1:2 (**Table 1, entry 14**).

Further, we varied the loading of Eosin Y from 3 mol% to 1, 2, 4 mol% (**Table 1, entries 16-18**) and found a decrease in yield on increasing or decreasing the mol% of the photocatalyst. We tried extending or shortening the reaction time (**Table 1, entries 19-20**), but we failed to get a better yield of product 4a.

**Table 1-** Optimization of reaction parameters for oxidative coupling of Indole and Phenylhydrazine <sup>(a)</sup>

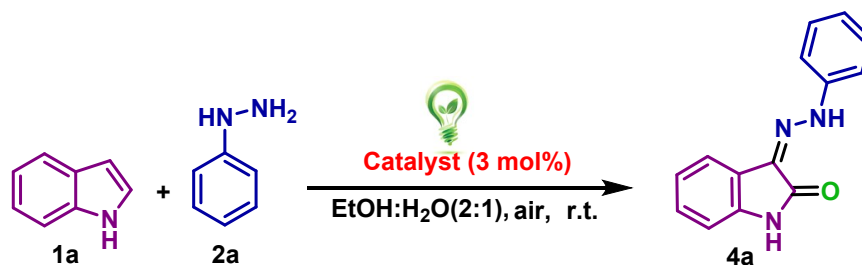

| Entry | Catalyst          | Solvent                          | Time (h)  | Yield <sup>(b)</sup> (%) |
|-------|-------------------|----------------------------------|-----------|--------------------------|
| 1     | Rhodamine B(3)    | EtOH                             | 24        | 4                        |
| 2     | Rose Bengal(3)    | EtOH                             | 24        | 8                        |
| 3     | Xanthone(3)       | EtOH                             | 24        | 5                        |
| 4     | Eosin Y(3)        | EtOH                             | 24        | 42                       |
| 5     | Eosin Y(3)        | DMF                              | 24        | 12                       |
| 6     | Eosin Y(3)        | Acetonitrile                     | 24        | 15                       |
| 7     | Eosin Y(3)        | Methanol                         | 24        | 22                       |
| 8     | Eosin Y(3)        | Toluene                          | 24        | 18                       |
| 9     | Eosin Y(3)        | DMSO                             | 24        | 10                       |
| 10    | Eosin Y(3)        | THF                              | 24        | 20                       |
| 11    | Eosin Y(3)        | H <sub>2</sub> O                 | 24        | 45                       |
| 12    | Eosin Y(3)        | EtOH:H <sub>2</sub> O (1:1)      | 24        | 68                       |
| 13    | Eosin Y(3)        | EtOH:H <sub>2</sub> O (2:1)      | 24        | 65                       |
| 14    | <b>Eosin Y(3)</b> | <b>EtOH:H<sub>2</sub>O (1:2)</b> | <b>24</b> | <b>88</b>                |
| 15    | Eosin Y(3)        | EtOH:H <sub>2</sub> O (1:4)      | 24        | 80                       |
| 16    | Eosin Y(1)        | EtOH:H <sub>2</sub> O (1:2)      | 24        | 75                       |
| 17    | Eosin Y(2)        | EtOH:H <sub>2</sub> O (1:2)      | 24        | 81                       |
| 18    | Eosin Y(4)        | EtOH:H <sub>2</sub> O (1:2)      | 24        | 85                       |
| 19    | Eosin Y(3)        | EtOH:H <sub>2</sub> O (1:2)      | 26        | 82                       |
| 20    | Eosin Y(3)        | EtOH:H <sub>2</sub> O (1:2)      | 20        | 78                       |

<sup>(a)</sup>Reaction Condition: Indole (0.25mmol), Phenylhydrazine (0.25mmol), catalyst (3 mol %), solvent (5mL), Blue LED (24 h) under open air at room temperature. <sup>(b)</sup>Isolated yield.

**Table 2** – Optimization of different colour LED <sup>(a)</sup>

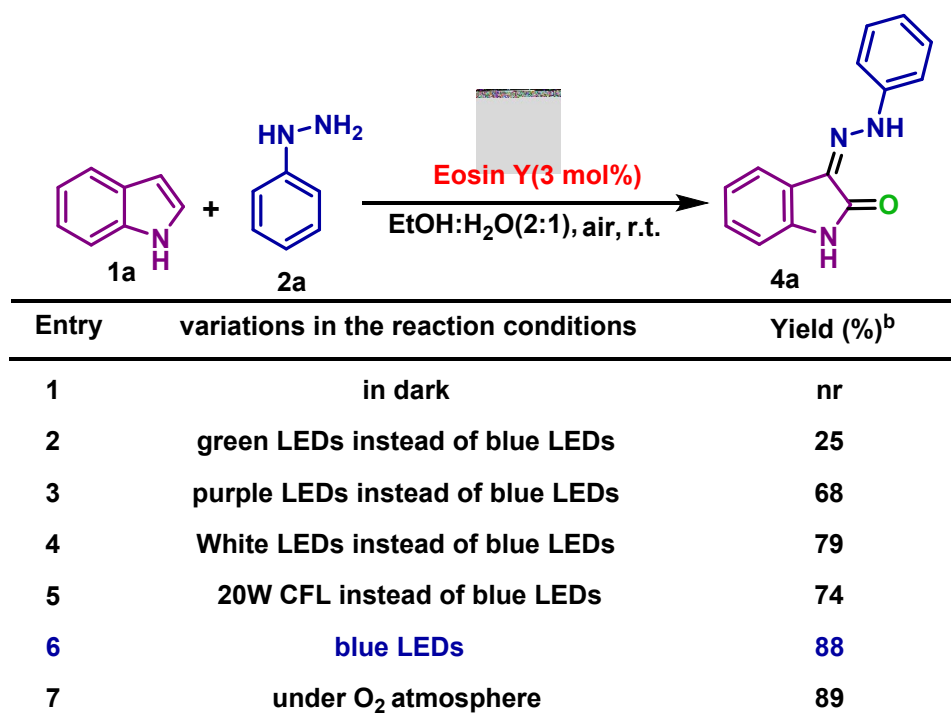

<sup>(a)</sup>Reaction Condition: Indole (0.25mmol), Phenylhydrazine (0.25mmol), catalyst (3 mol %), solvent (5mL), Blue LED (24 h) under open air at room temperature. <sup>(b)</sup>Isolated yield

## 6. Control experiment

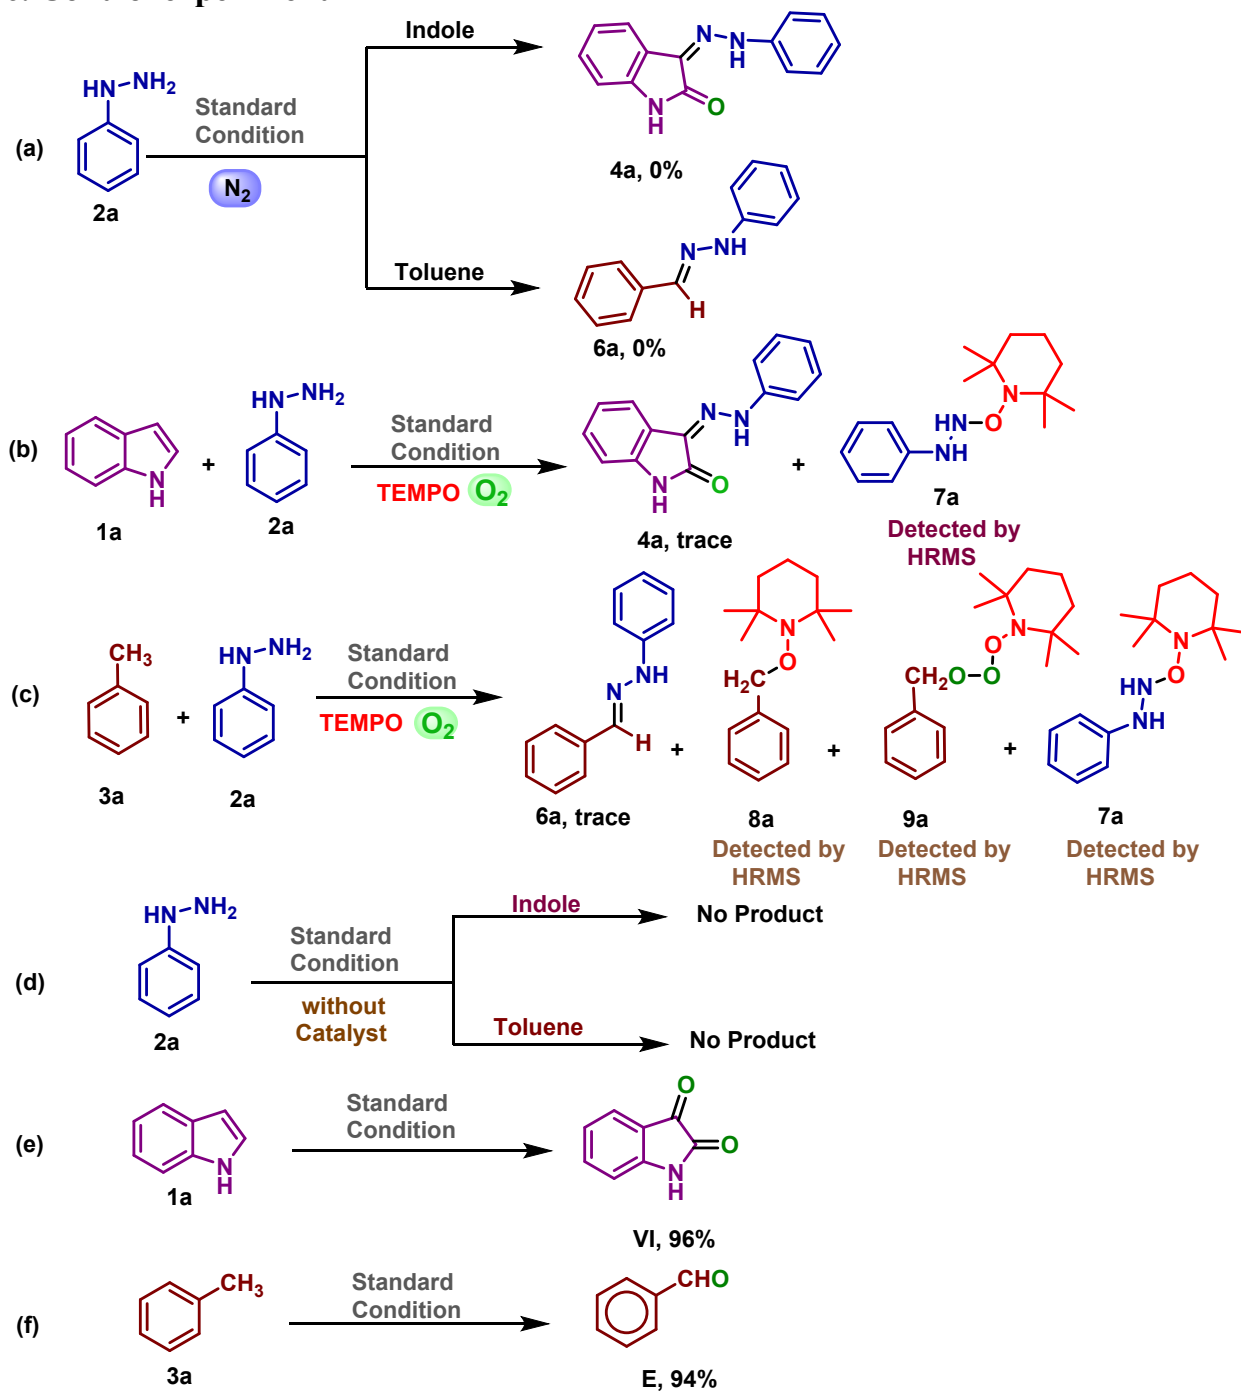

Fig 11: Control experiments for mechanistic investigation
